# Supplementary material for: Magmatic record of India-Asia collision
Source: PubMed Central journal article supplement (PMC4585790; doi:10.1038/srep14289), 2015-09-23
Supplement: srep14289-s1.pdf [file srep14289-s1.pdf]

# Online supplementary information

## Magmatic record of India-Asia collision

Di-Cheng Zhu<sup>\*</sup>, Qing Wang, Zhi-Dan Zhao, Sun-Lin Chung, Peter A. Cawood, Yaoling Niu, Sheng-Ao Liu, Fu-Yuan Wu, and Xuan-Xue Mo

Corresponding author, Email: [dchengzhu@163.com](mailto:dchengzhu@163.com)

### Includes the following materials:

1. **Figure S1** Distribution and field occurrences the Gangdese arc rocks in southern Tibet

2. Zircon U-Pb dating methods, data, and geochemical data

SIMS U-Pb dating

LA-ICPMS U-Pb dating

Concordia plots for single zircon analyzed by SIMS 1280 U-Pb dating

Concordia plots for single zircon analyzed by LA-ICPMS U-Pb dating

**Table S1** Zircon SIMS U-Pb age data reported in this study for the Linzizong volcanic rocks in Linzhou Basin

**Table S2** Zircon LA-ICPMS U-Pb age data reported in this study for the Linzizong volcanic rocks in Linzhou Basin

**Table S3** Zircon U-Pb age data of the 80–40 Ma intrusive rocks from the Gangdese Batholith (85–95°E) in southern Tibet

**Table S4** Geochemical data of the Linzizong volcanic rocks in Linzhou Basin

**Table S5** SiO<sub>2</sub> contents of the 80–40 Ma intrusive rocks from the Gangdese Batholith (85–95°E) in southern Tibet

**Table S6** Calculation for the timing of collision

3. References Cited in **Tables S3, S4, and S5**

# Magmatic record of India-Asia collision

Di-Cheng Zhu\*, Qing Wang, Zhi-Dan Zhao, Sun-Lin Chung, Peter A. Cawood, Yaoling Niu, Sheng-Ao Liu, Fu-Yuan Wu, and Xuan-Xue Mo

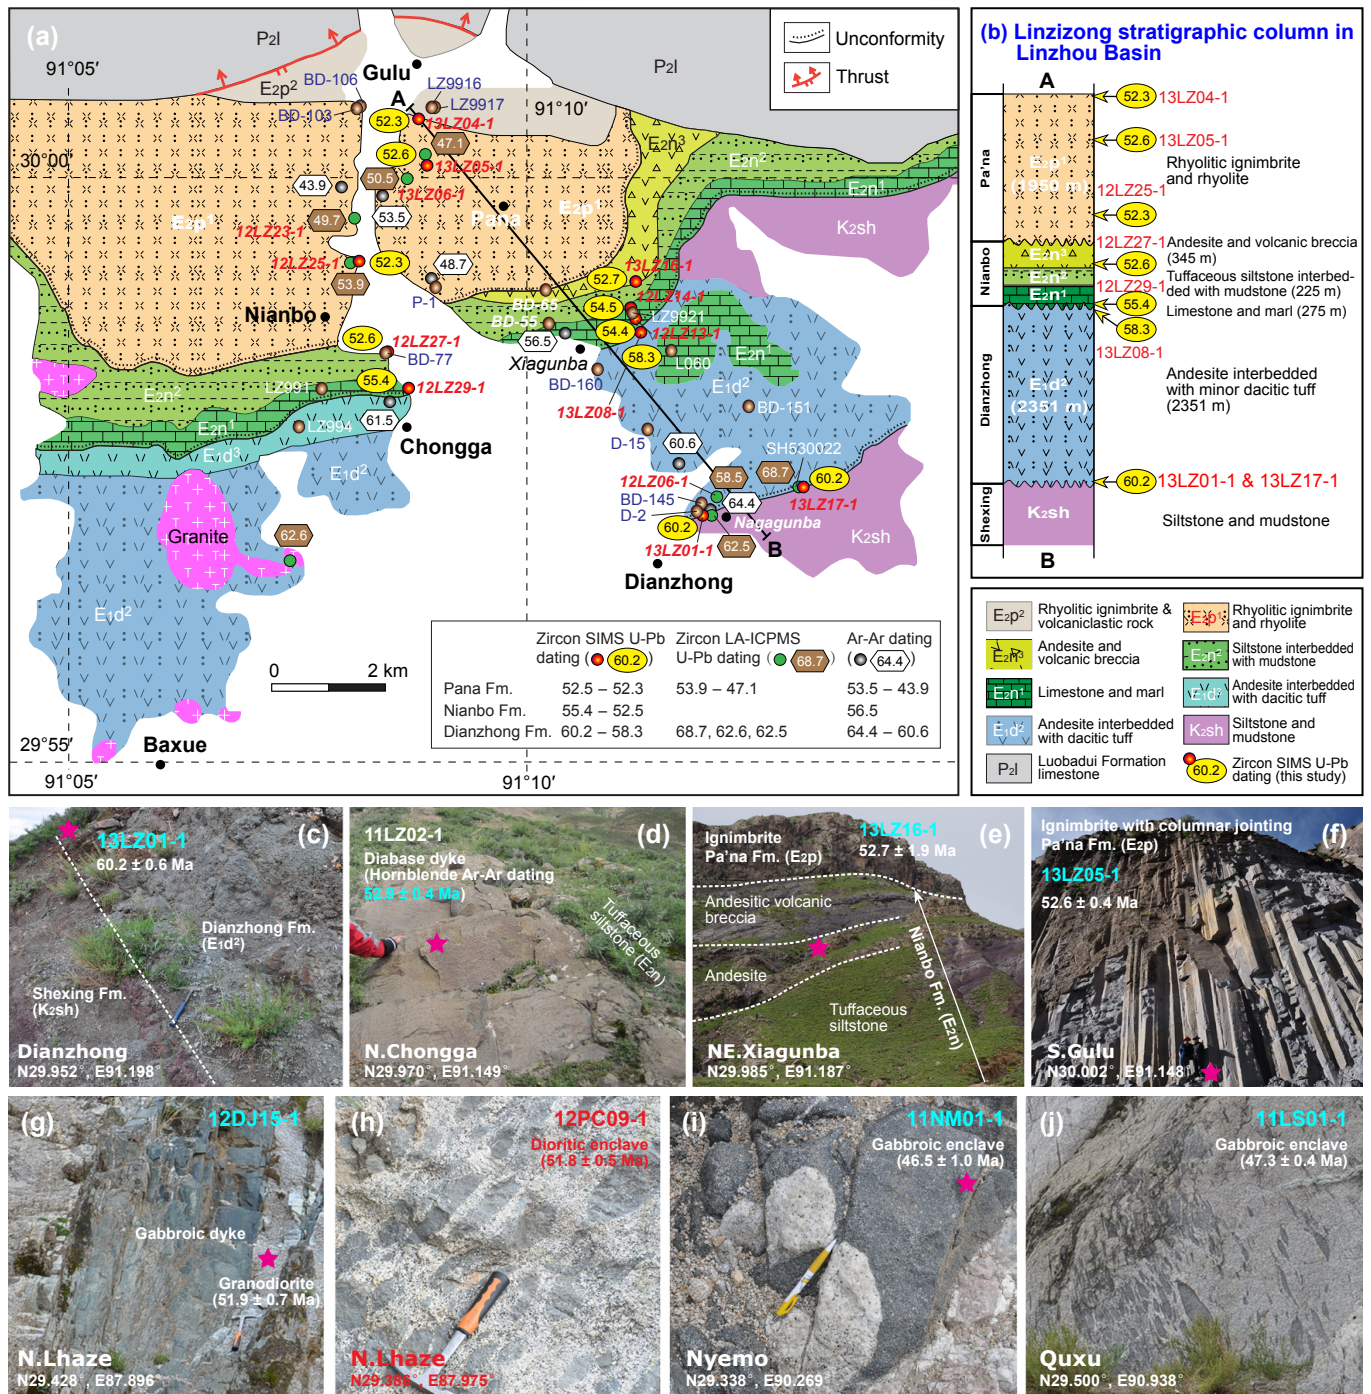

**Figure S1** Distributions and field occurrences of the Gangdese arc rocks in southern Tibet  
**a** - Distributions of the Linzizong volcanic rocks in Linzhou Basin (modified from Dong et al., 2005);  
**b** - The stratigraphic column of the Linzizong volcanic rocks in Linzhou Basin (modified from Mo et al., 2007);  
**c, d, e, and f** - Photos of the Linzizong volcanic rocks in Linzhou Basin taken by Di-Cheng Zhu (2011, 2013);  
**g, h, i, and j** - Photos of the granitoids in the Gangdese Batholith taken by Di-Cheng Zhu (2011, 2012). This figure is generated by Di-Cheng Zhu, using Adobe Illustrator CS4 created by the Adobe Illustrator Team under an open license.

## References:

Dong, G., Mo, X., Zhao, Z., Wang, L., Zhou, S. A new understanding of the stratigraphic successions of the Linzizong volcanics in the Linzhou Basin, northern Lhasa, Tibet, China. *Geol. Bull. China* 24, 549–557 (in Chinese with English abstract) (2005).  
 Mo, X.X. et al. Mantle contributions to crustal thickening in south Tibet in response to the India-Asia collision. *Lithos* 96, 225–242 (2007).

## 2. Zircon U-Pb dating methods, data, and Geochemical data

### SIMS U-Pb dating:

Samples for U-Pb analysis were processed by conventional magnetic and density techniques to concentrate non-magnetic, heavy fractions. Zircon grains, together with zircon standard 91500 were mounted in epoxy mounts which were then polished to section the crystals in half for analysis. All zircons were documented with transmitted and reflected light micrographs as well as cathodoluminescence (CL) images to reveal their internal structures, and the mount was vacuum-coated with high-purity gold prior to secondary ion mass spectrometry (SIMS) analysis.

Measurements of U, Th and Pb were conducted using the Cameca IMS-1280 SIMS at the Institute of Geology and Geophysics, Chinese Academy of Sciences in Beijing. U-Th-Pb ratios and absolute abundances were determined relative to the standard zircon 91500 (Wiedenbeck et al., 1995), analyses of which were interspersed with those of unknown grains, using operating and data processing procedures similar to those described by Li et al. (2009). A long-term uncertainty of 1.5% (1 RSD) for  $^{206}\text{Pb}/^{238}\text{U}$  measurements of the standard zircons was propagated to the unknowns (Li et al., 2010), despite that the measured  $^{206}\text{Pb}/^{238}\text{U}$  error in a specific session is generally around 1% (1 RSD) or less. Measured isotopic compositions were corrected using the  $^{207}\text{Pb}$ -based correction method and were shown as Tera-Wasserburg plots (Li et al., 2010). Uncertainties on individual analyses in data tables are reported at a 1 $\sigma$  level; mean ages for pooled U/Pb (and Pb/Pb) analyses are quoted with 95% confidence interval. Data reduction was carried out using the Isoplot/Ex v. 2.49 program (Ludwig, 2001). The lower intercept age in the Tera-Wasserburg plot of the Qinghu standard measured during the sample runs is  $160.22 \pm 0.86$  Ma (46 analyses,  $2\sigma$ ; MSWD = 1.4), identical to the result ( $159.5 \pm 0.7$  Ma) reported by Li et al. (2009).

### References:

- Li, Q.L., Li, X.H., Liu, Y., Tang, G.Q., Yang, J.H., Zhu, W.G., 2010. Precise U-Pb and Pb-Pb dating of Phanerozoic baddeleyite by SIMS with oxygen flooding technique. *Journal of Analytical Atomic Spectrometry* 25, 1107–1113.
- Li, X.H., Liu, Y., Li, Q.L., Guo, C.H., Chamberlain, K.R., 2009. Precise determination of Phanerozoic zircon Pb/Pb age by multicollector SIMS without external standardization, *Geochemistry, Geophysics, Geosystems* 10, Q04010, doi: 10.1029/2009GC002400.

- Ludwig, K.R., 2001. Users manual for Isoplot/Ex rev. 2.49. Berkeley Geochronology Centre Special Publication. No. 1a, 1–56 pp.
- Stacey, J.S., Kramers, J.D., 1975. Approximation of terrestrial lead isotope evolution by a two-stage model. *Earth and Planetary Science Letters* 26, 207–221.
- Wiedenbeck, M., Alle, P., Corfu, F., Griffin, W.L., Meier, M., Oberli, F., Vonquadt, A., Roddick, J.C., Spiegel, W., 1995. Three natural zircon standards for U-Th-Pb, Lu-Hf, trace-element and REE analyses. *Geostandards Newsletter* 19, 1–23.

### **LA-ICPMS U-Pb dating:**

The Zircon U-Pb isotopic analyses were performed using the LA-ICPMS housed at the State Key Laboratory of Geological Processes and Mineral Resources, China University of Geosciences (Wuhan). The detailed operating conditions for the laser ablation system, the ICP-MS instrument, and data reduction followed those described in [Liu et al. \(2010\)](#). ICPMSDataCal ([Liu et al., 2010](#)) was used for off-line selection and the integration of background and analyse signals, time-drift correction, U–Pb dating, and quantitative calibration for trace element analyses. The common Pb correction followed the ComPbCorr#3-151 procedure ([Andersen, 2002](#)). Age calculations and plotting of concordia diagrams were made using ISOPLOT (ver 3.0) ([Ludwig, 2003](#)). Uncertainties of individual analyses are reported as  $1\sigma$ ; mean ages for pooled  $^{206}\text{Pb}/^{238}\text{U}$  results are reported as  $2\sigma$ .

### **References:**

- Andersen, T., 2002. Correction of common lead in U–Pb analyses that do not report  $^{204}\text{Pb}$ . *Chemical Geology* 192, 59–79.
- Liu, Y.S., Gao, S., Hu, Z.C., Gao, C.G., Zong, K.Q., Wang, D.B., 2010. Continental and Oceanic Crust Recycling-induced Melt-Peridotite Interactions in the Trans-North China Orogen: U–Pb Dating, Hf Isotopes and Trace Elements in Zircons from Mantle Xenoliths. *Journal of Petrology* 51, 537–571.
- Ludwig, K.R., 2003. Isoplot 3.00: a geochronological toolkit for Microsoft Excel. Berkeley Geochronology Center, Special Publication No. 4, pp. 1–70.



### Magmatic record of India-Asia collision

Di-Cheng Zhu\*, Qing Wang, Zhi-Dan Zhao, Sun-Lin Chung, Peter A. Cawood, Yaoling Niu, Sheng-Ao Liu, Fu-Yuan Wu, and Xuan-Xue Mo

Concordia plots for single zircon analyzed by SIMS 1280 U–Pb dating

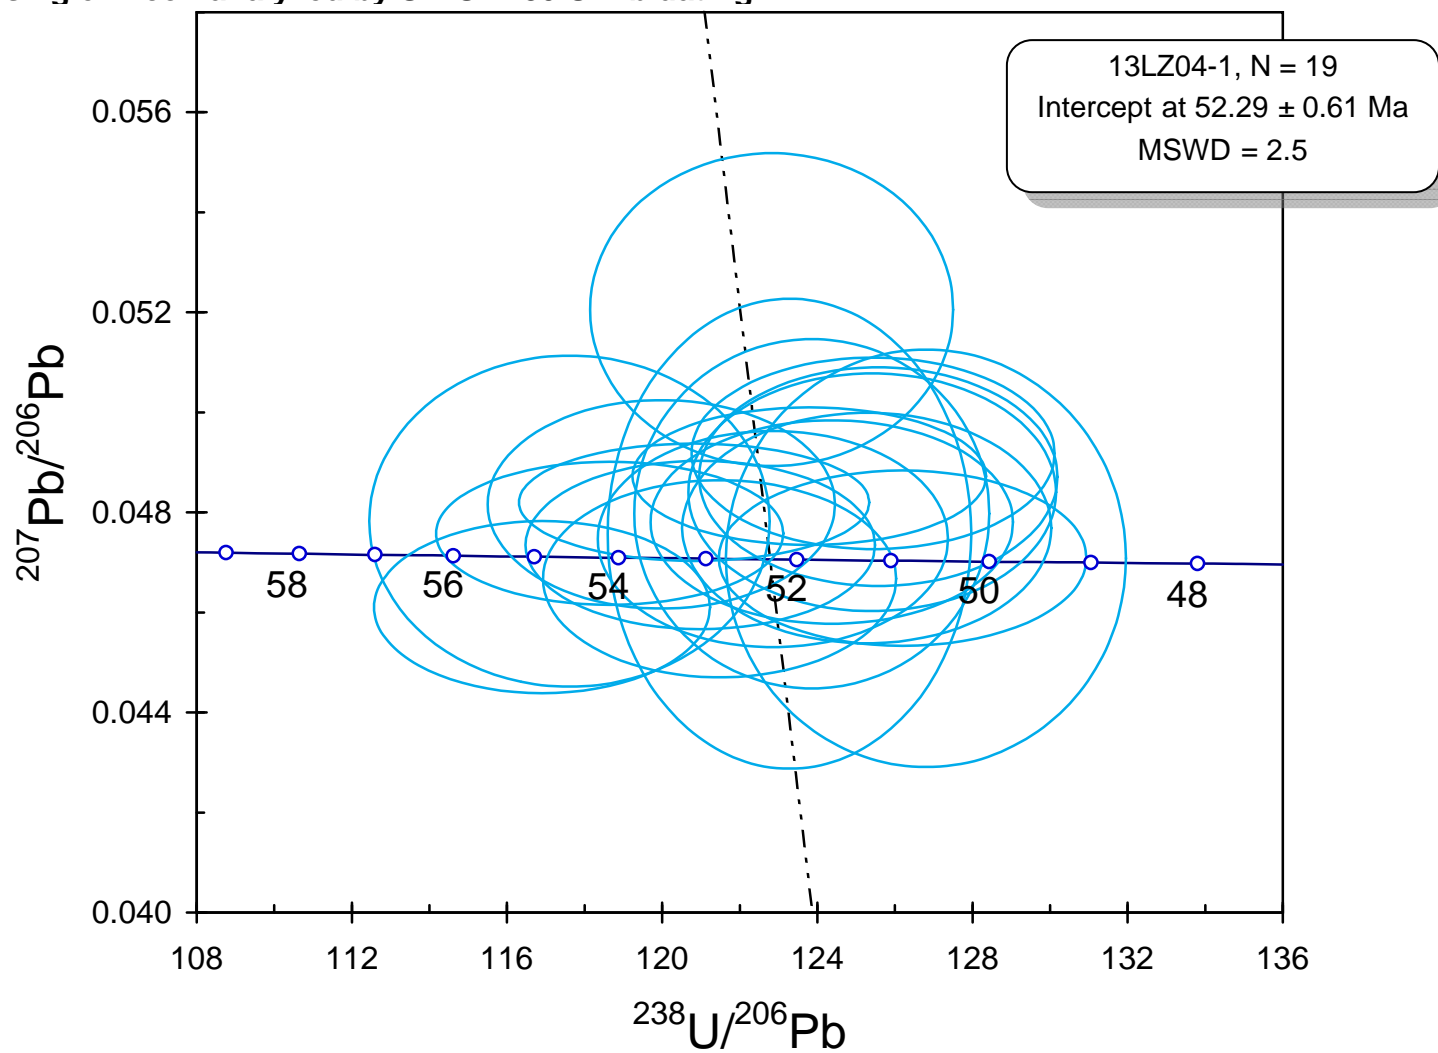

### Concordia plots for single zircon analyzed by SIMS 1280 U–Pb dating

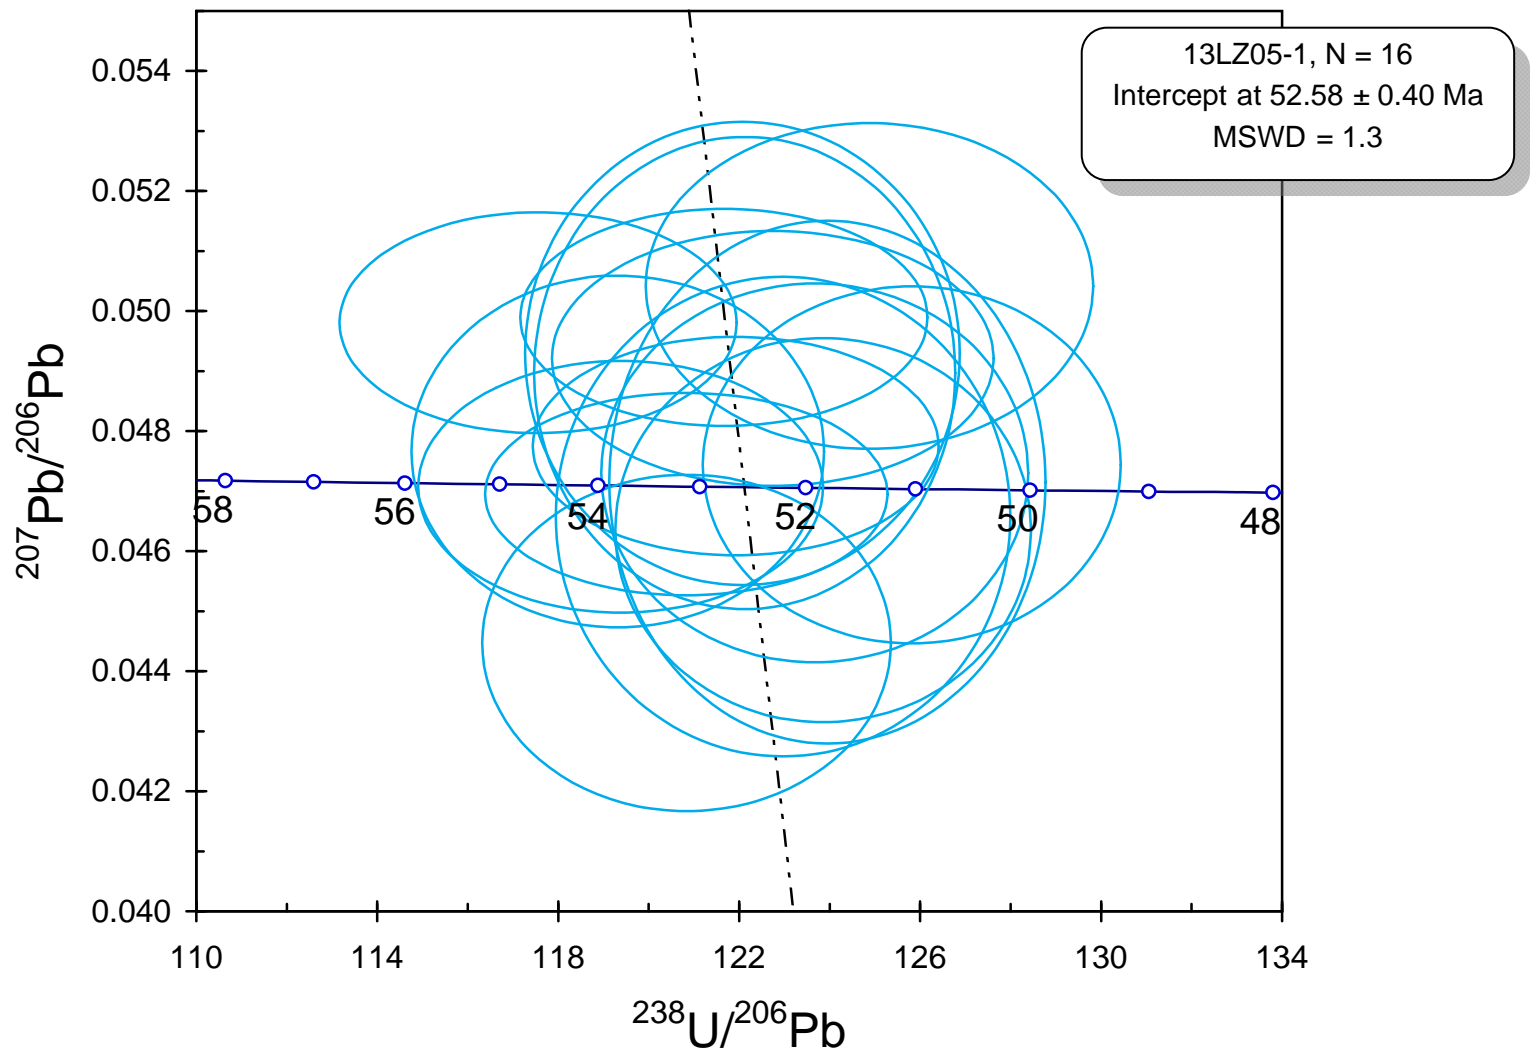

### Concordia plots for single zircon analyzed by LA-ICPMS U–Pb dating

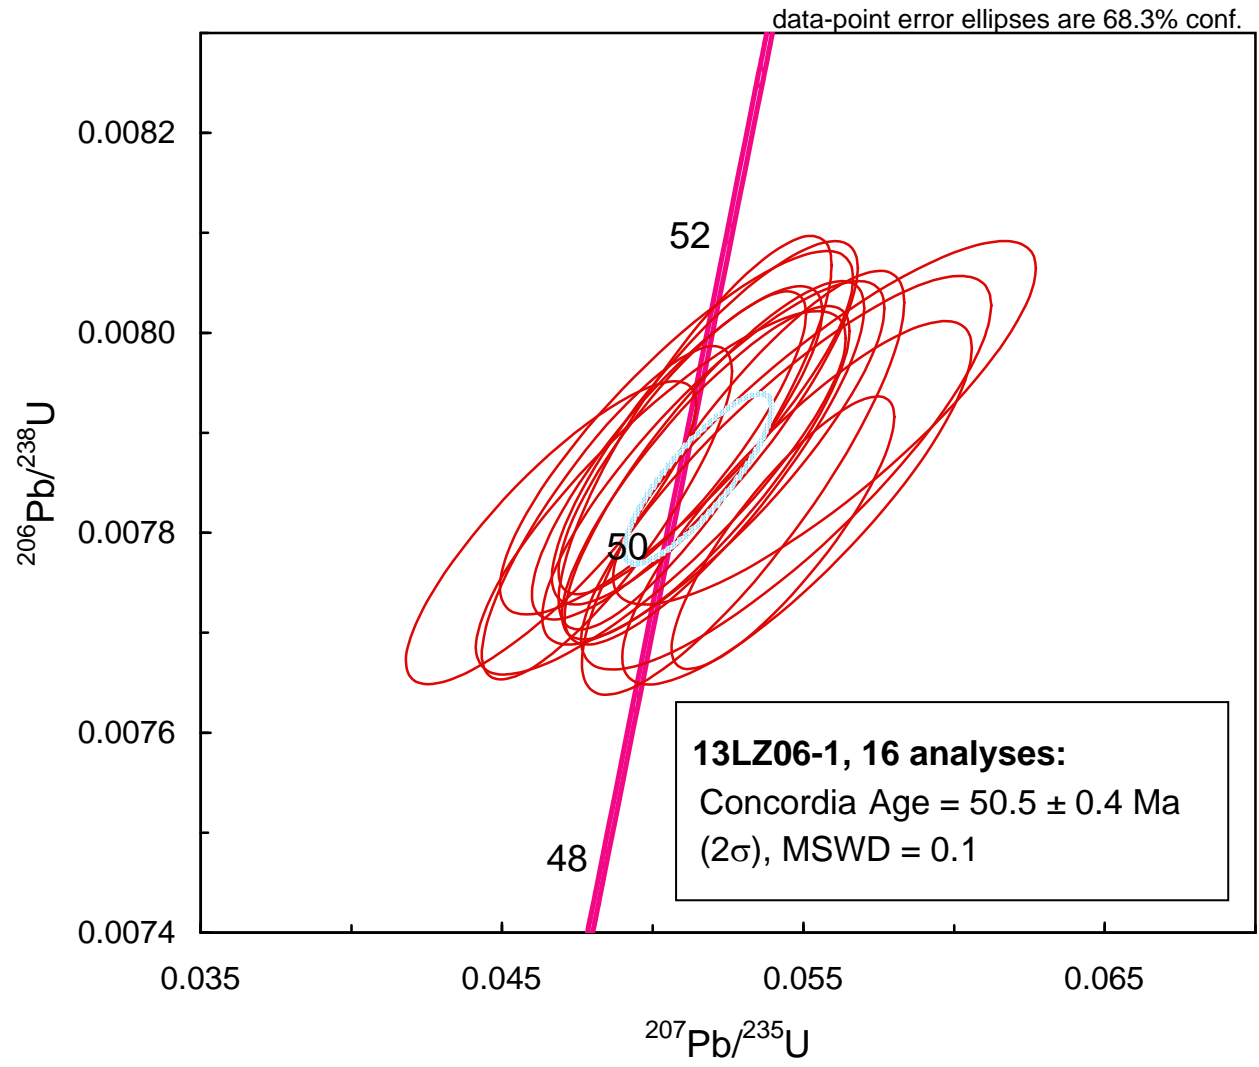

### Concordia plots for single zircon analyzed by LA-ICPMS U–Pb dating

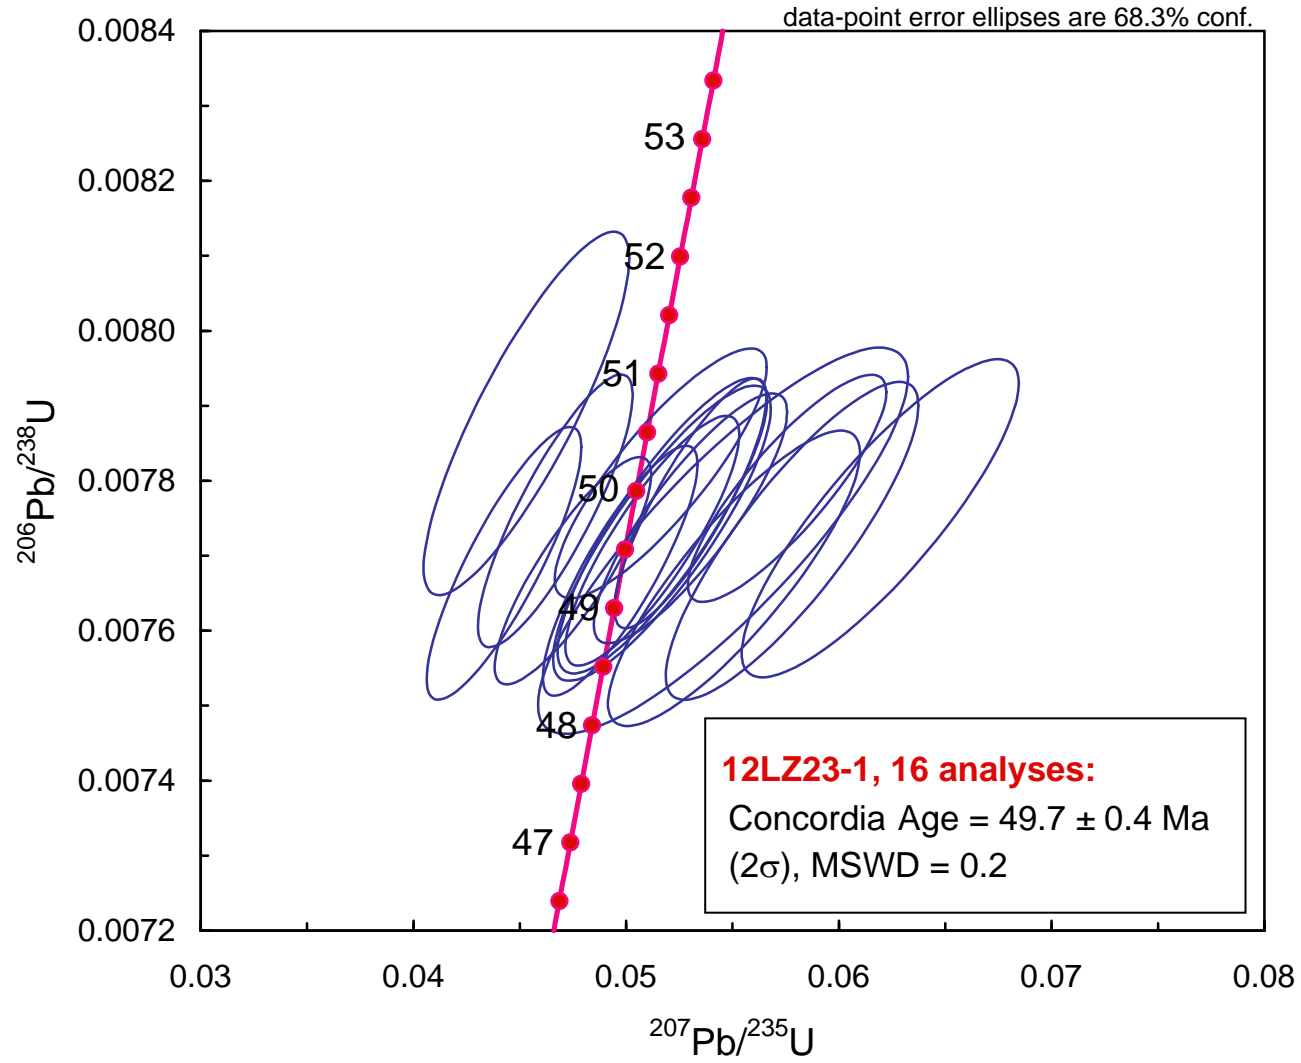



### Concordia plots for single zircon analyzed by SIMS 1280 U–Pb dating

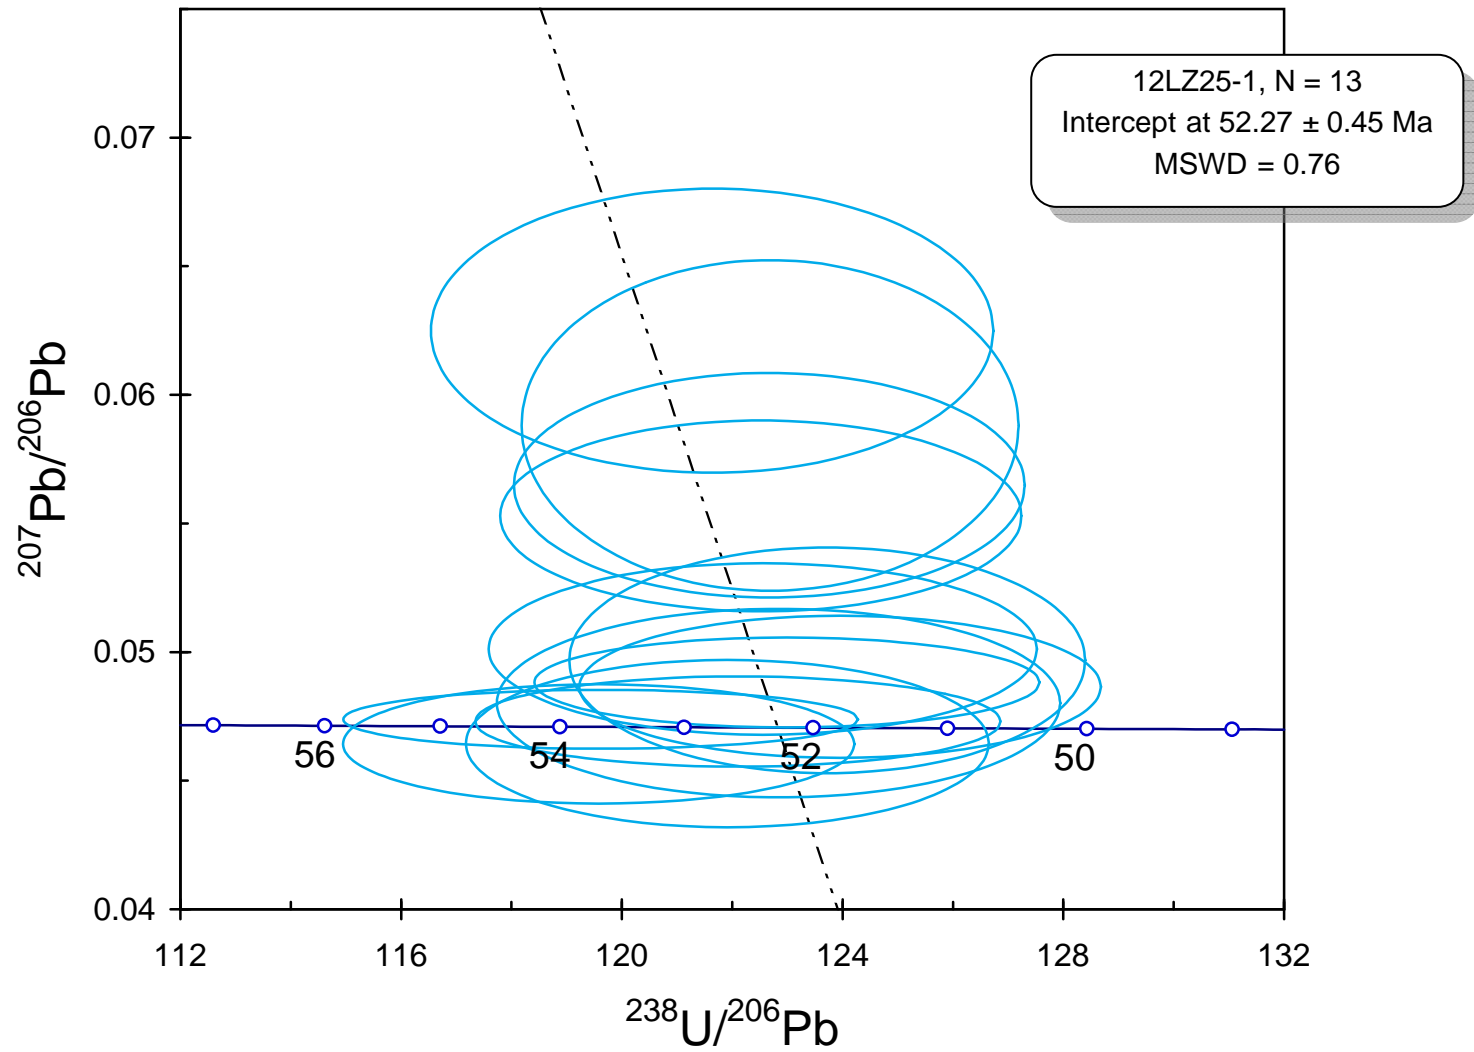

### Concordia plots for single zircon analyzed by SIMS 1280 U–Pb dating

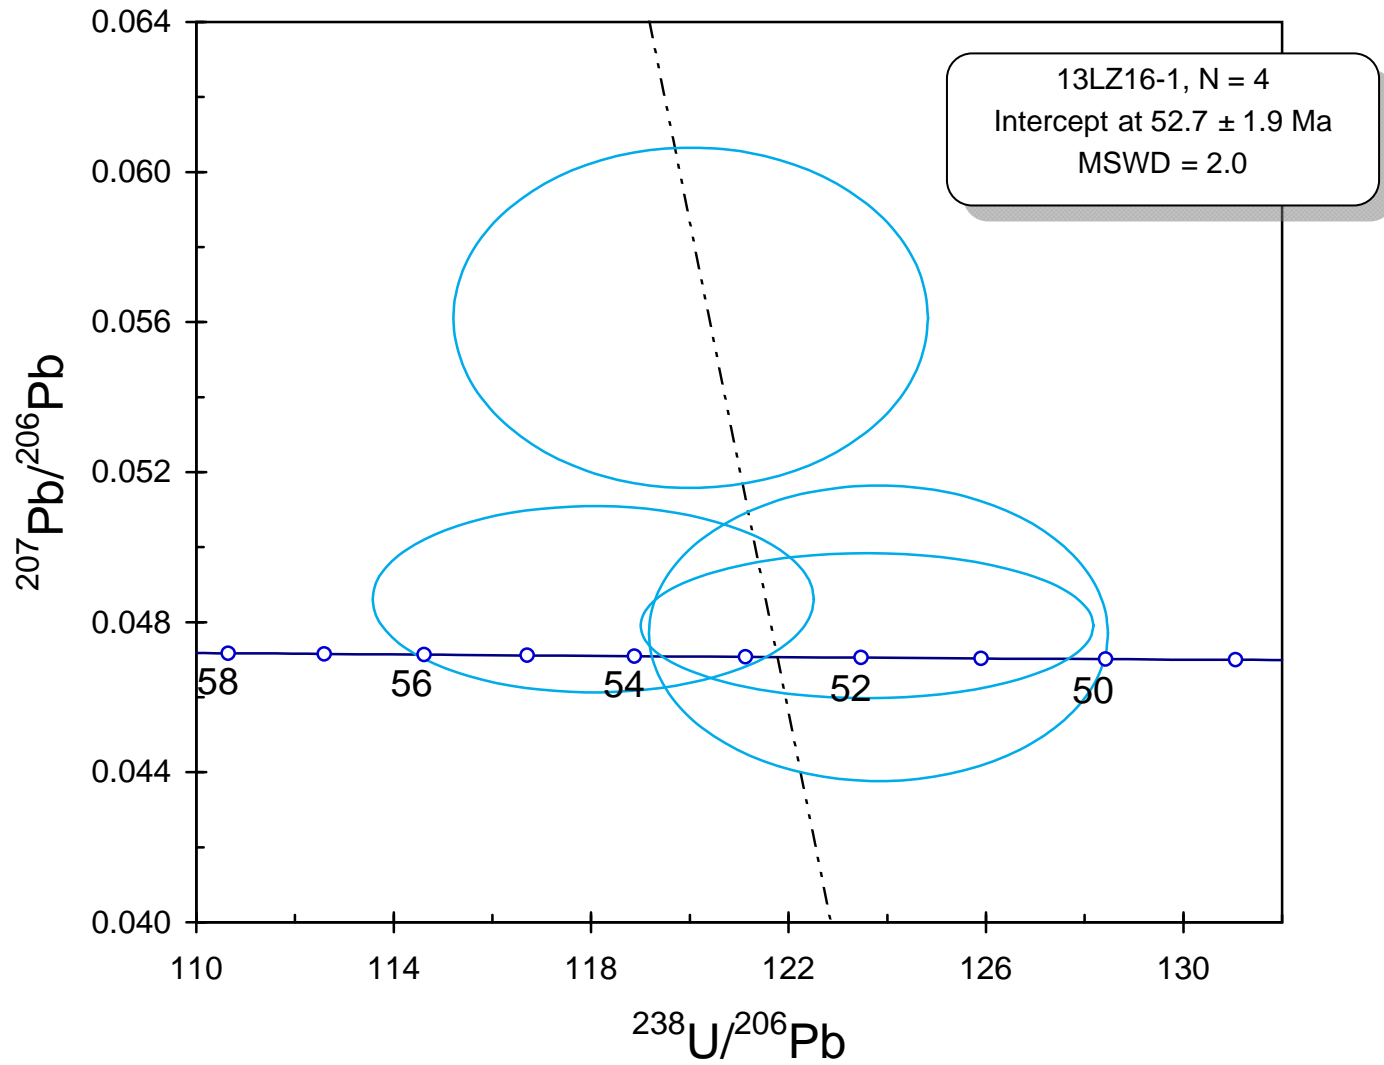

### Concordia plots for single zircon analyzed by SIMS 1280 U–Pb dating

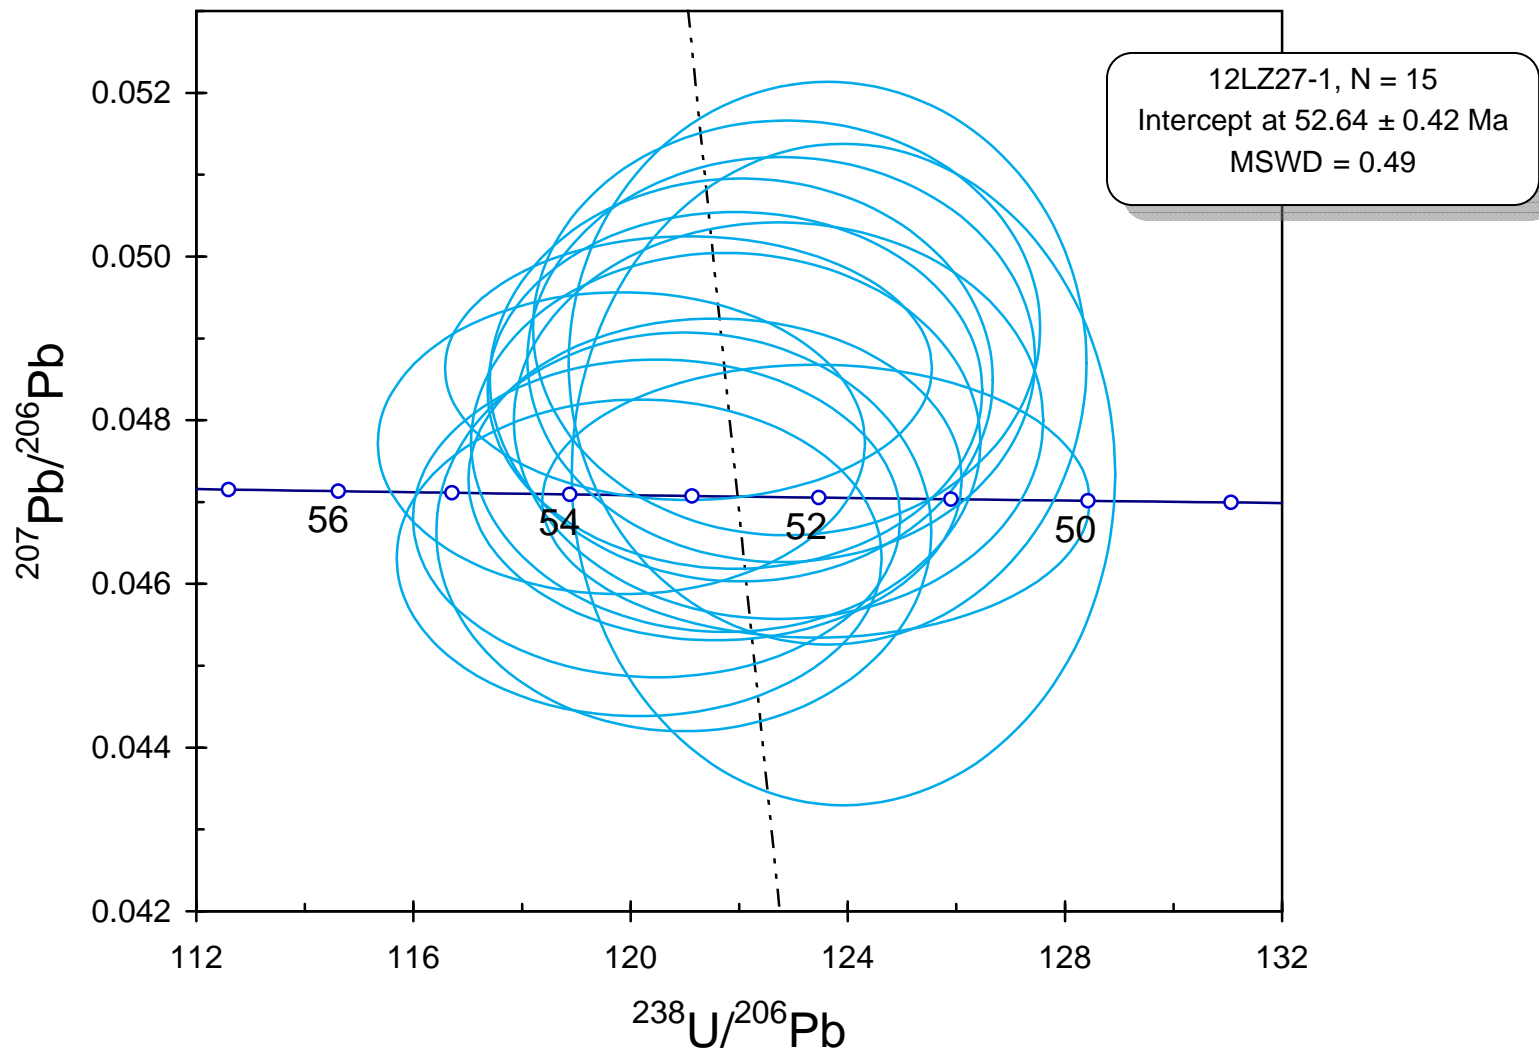

Concordia plots for single zircon analyzed by SIMS 1280 U–Pb dating

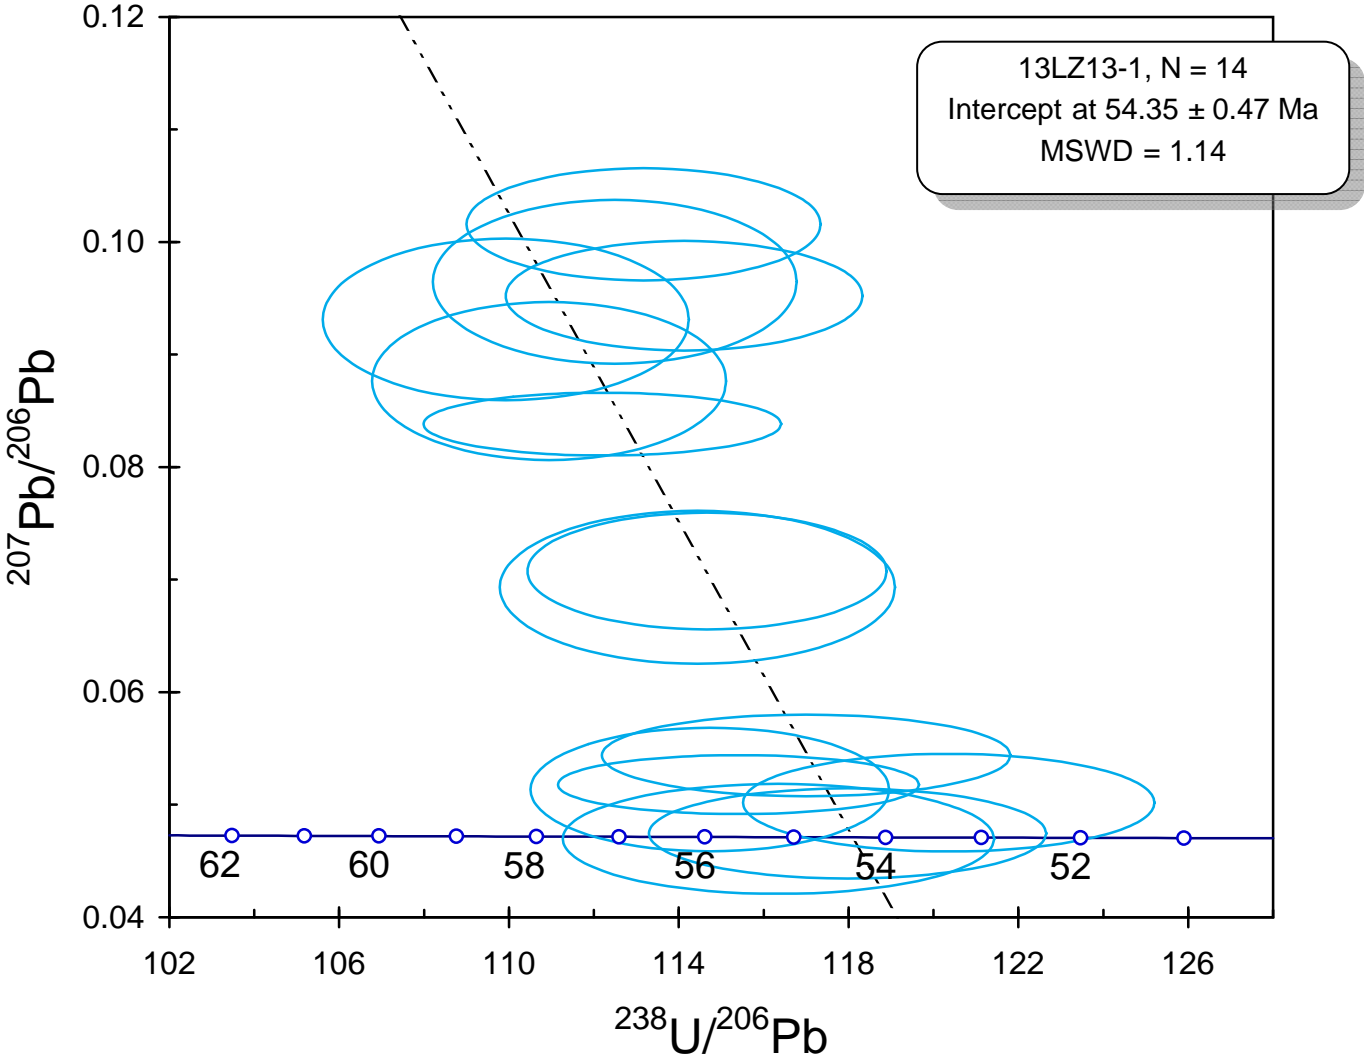

### Concordia plots for single zircon analyzed by SIMS 1280 U–Pb dating

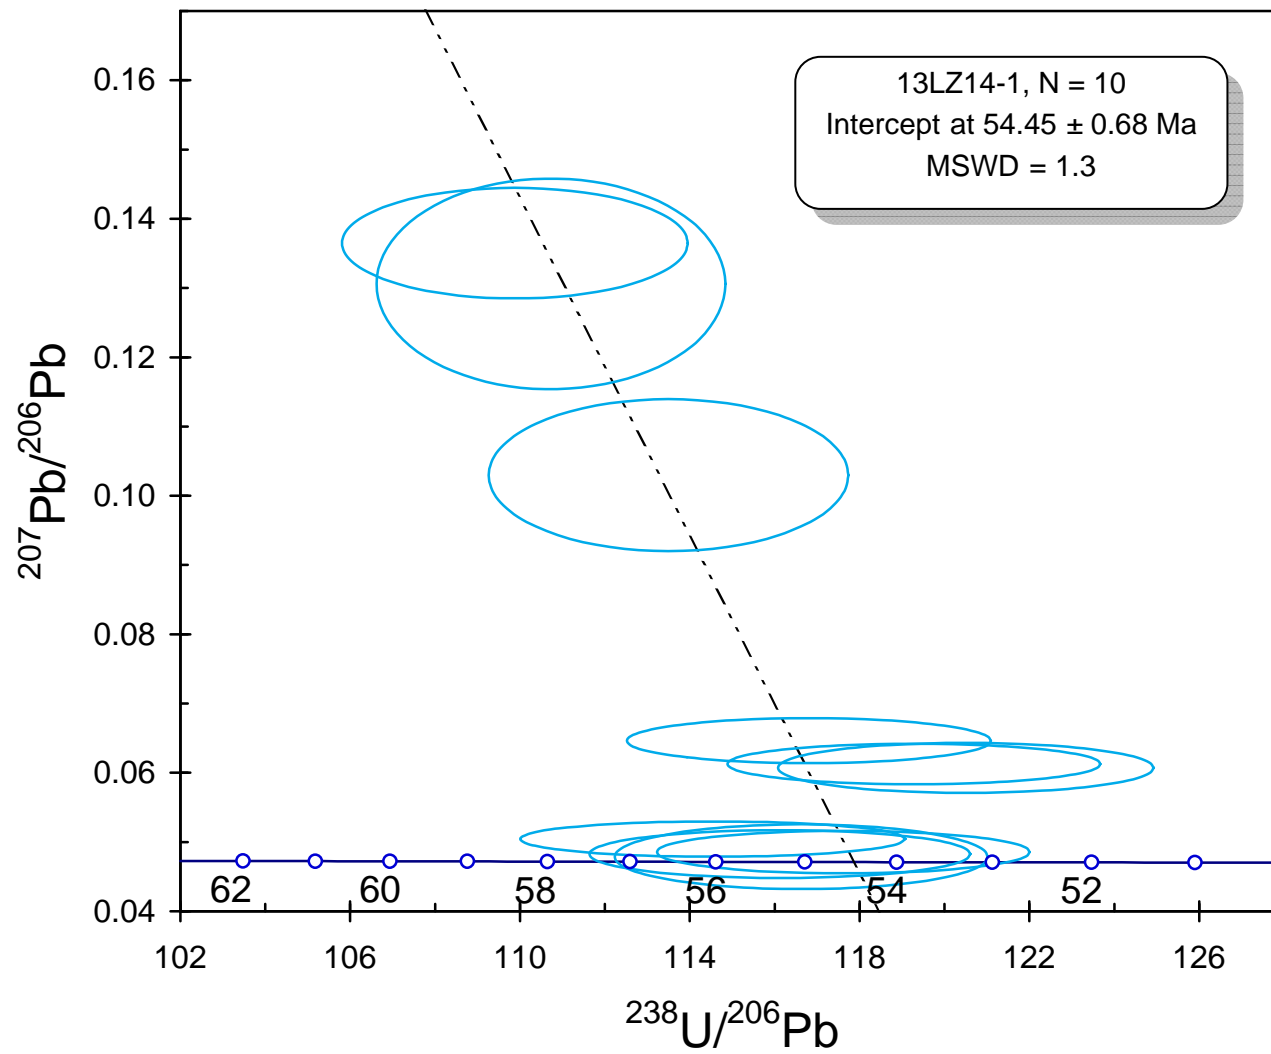

### Concordia plots for single zircon analyzed by SIMS 1280 U–Pb dating

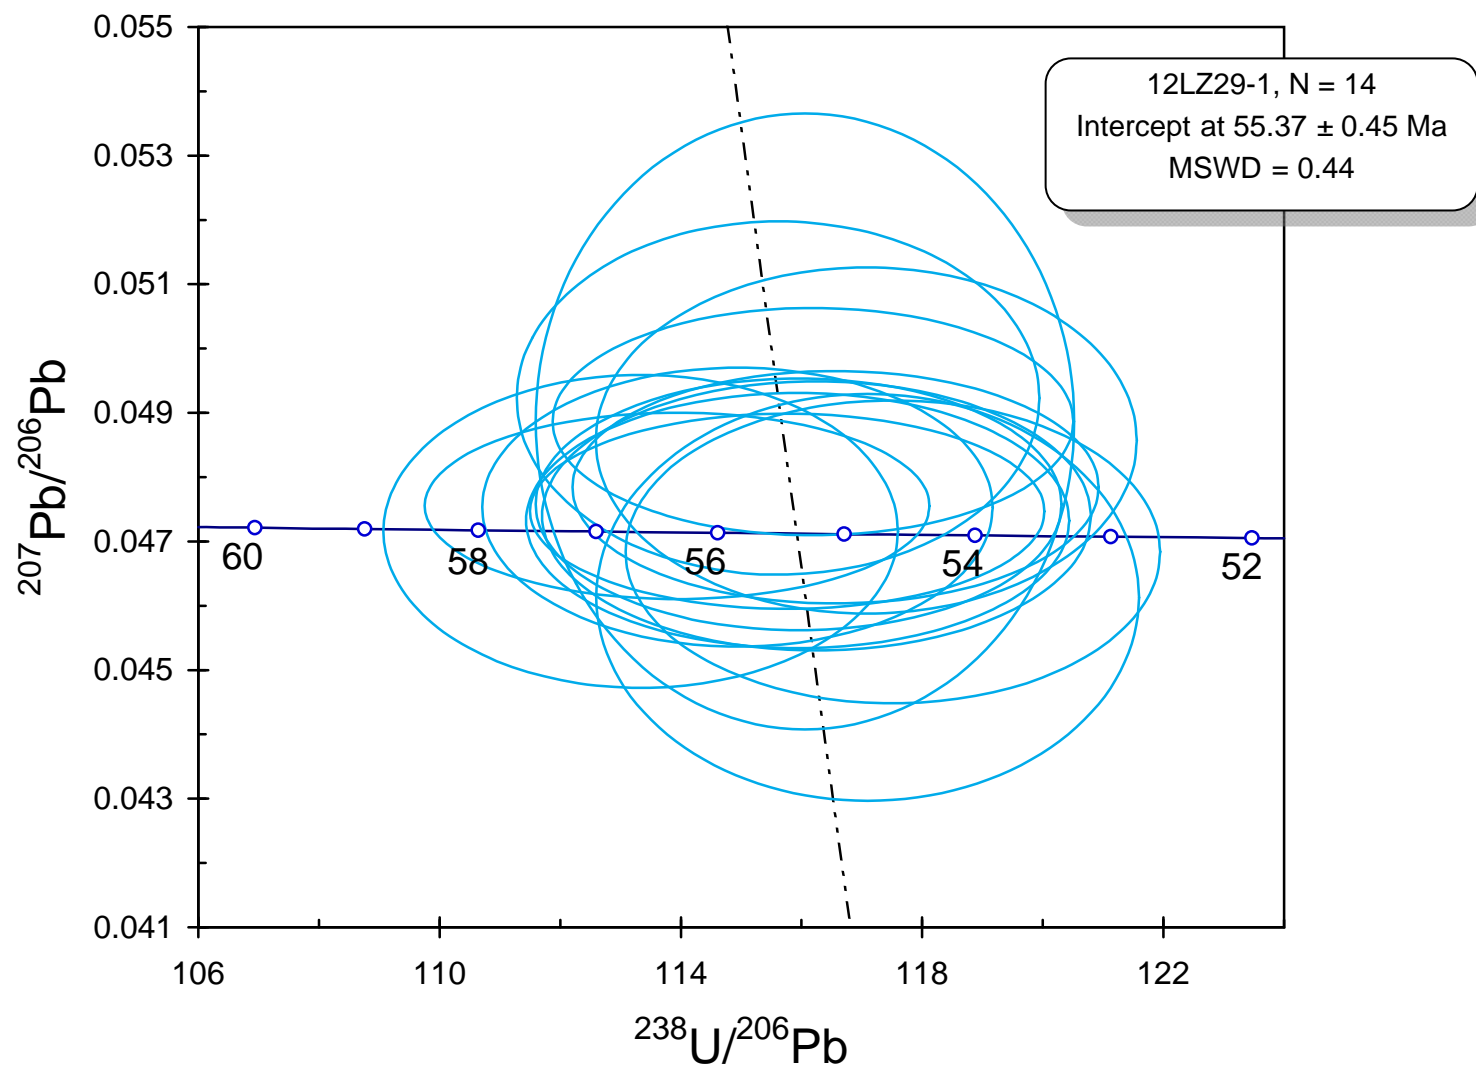



### Concordia plots for single zircon analyzed by SIMS 1280 U–Pb dating

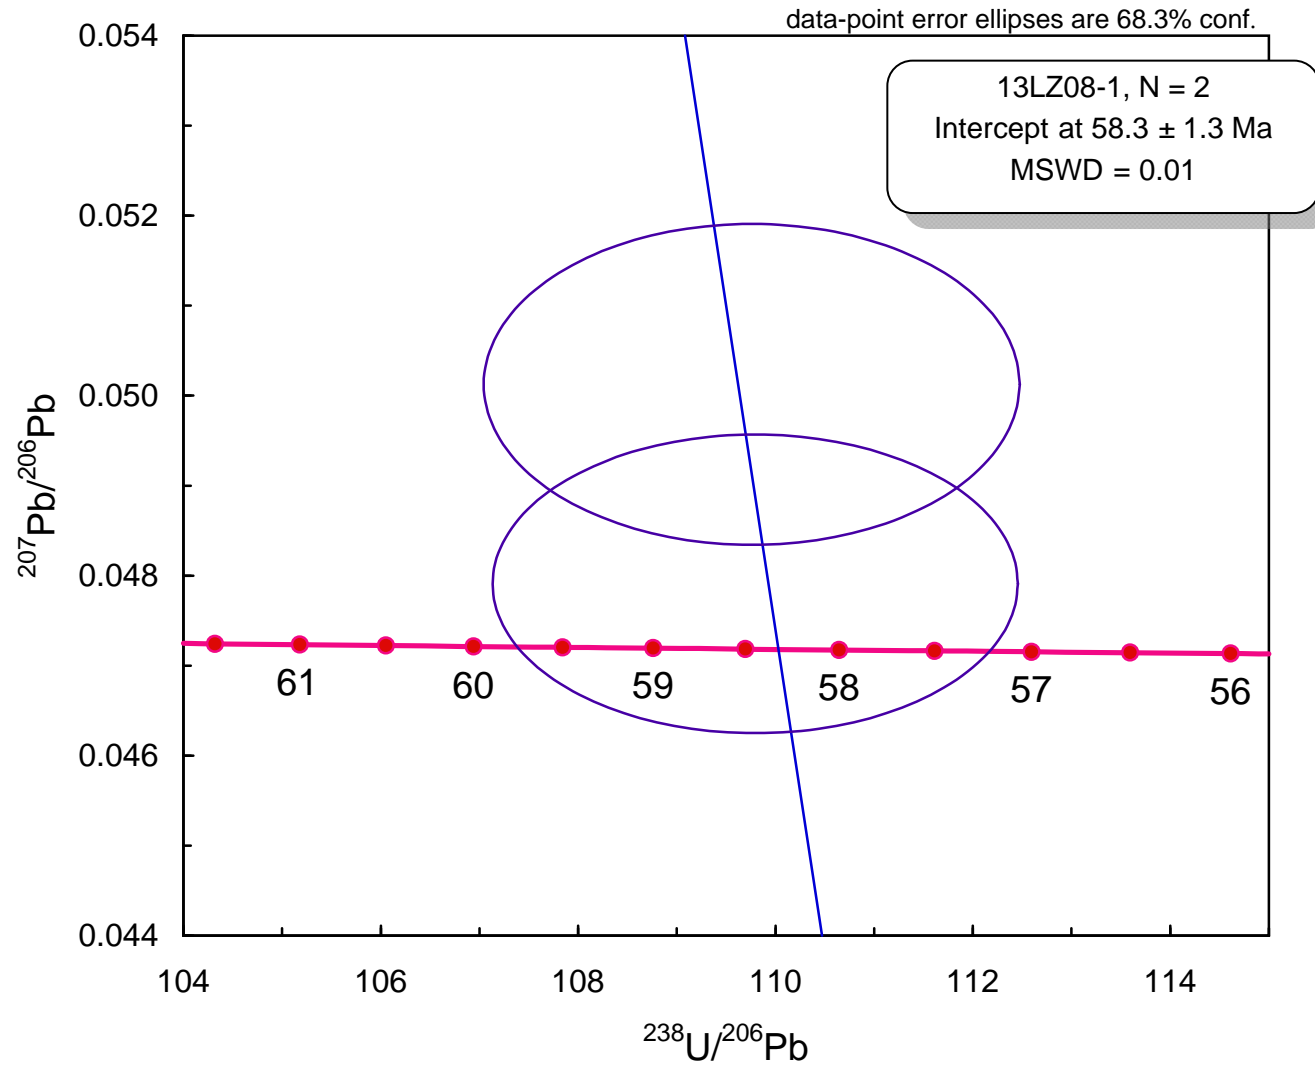

### Concordia plots for single zircon analyzed by LA-ICPMS U–Pb dating

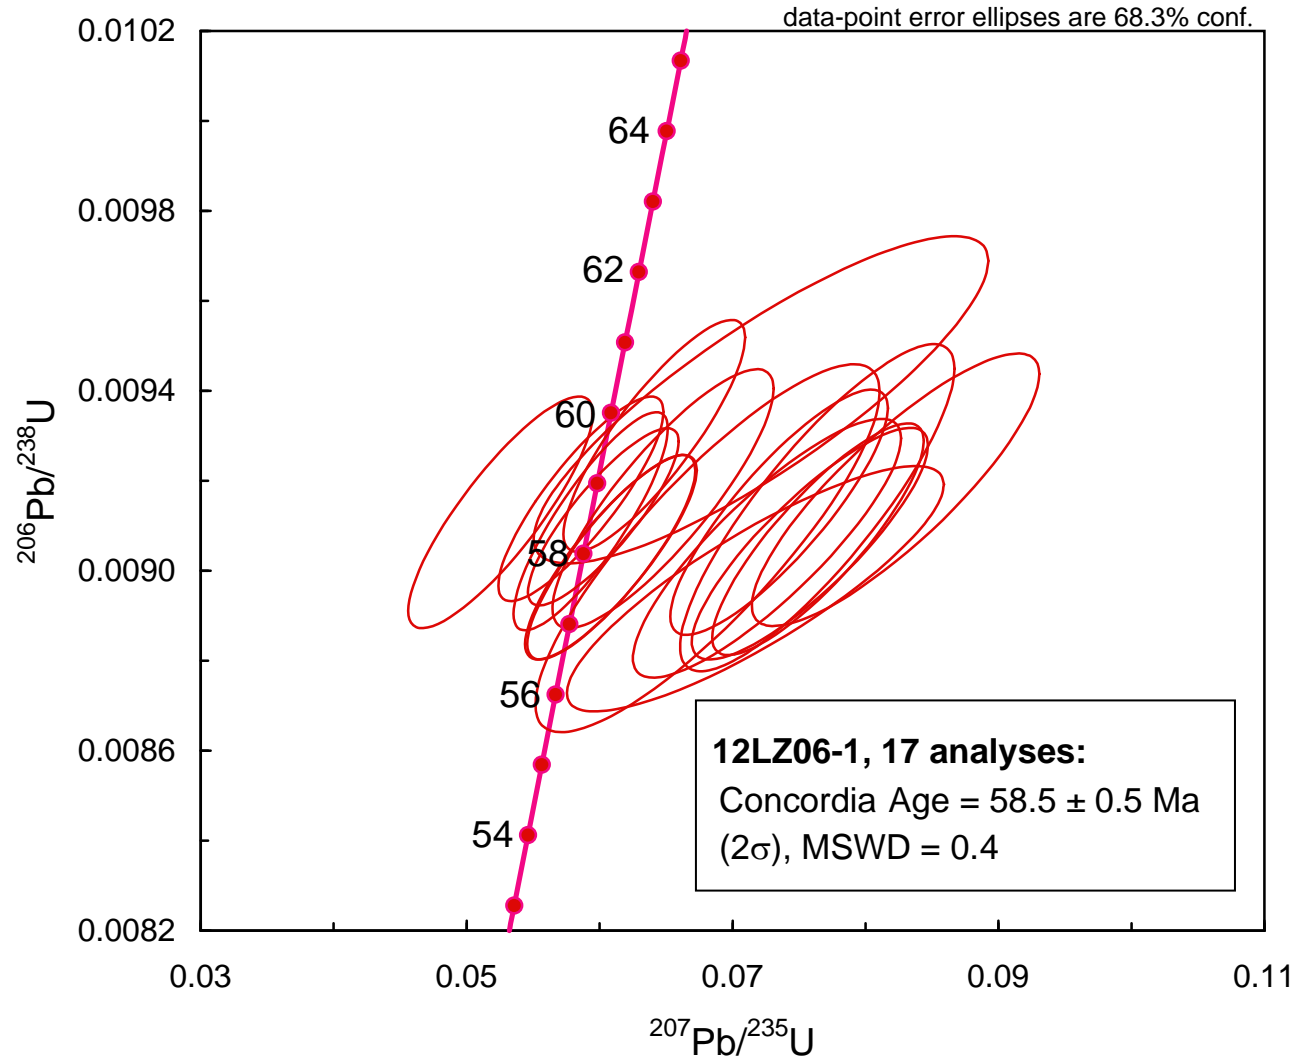

### Concordia plots for single zircon analyzed by SIMS 1280 U–Pb dating

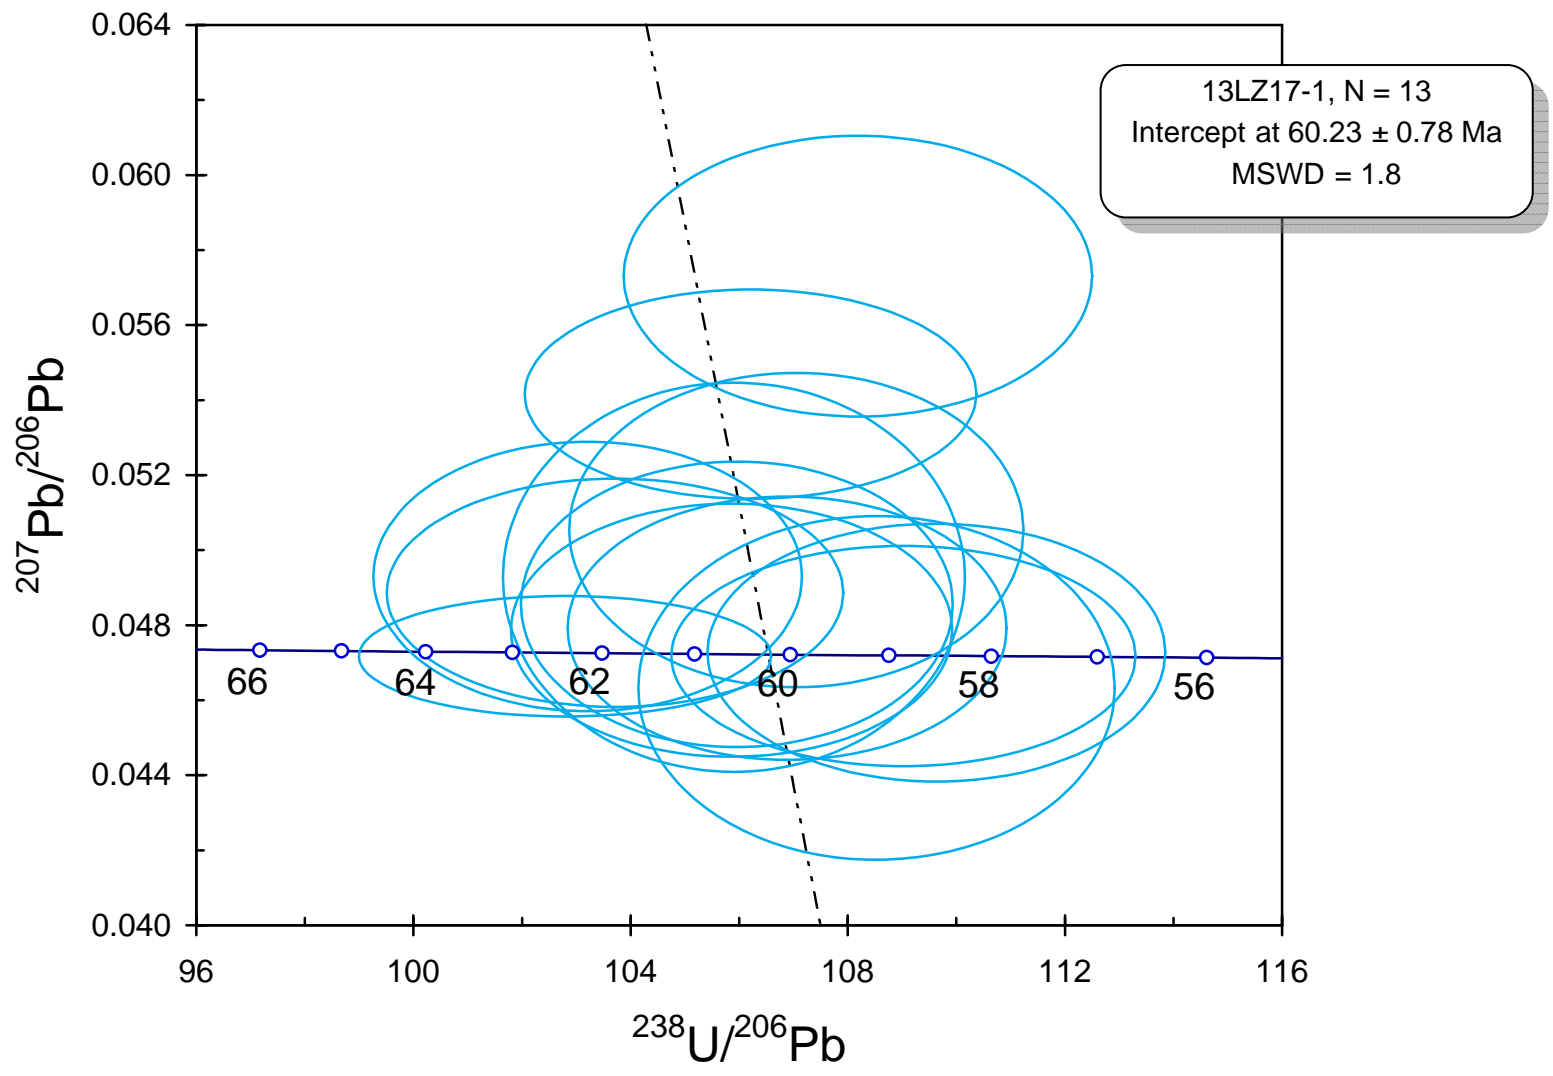

Concordia plots for single zircon analyzed by SIMS 1280 U–Pb dating

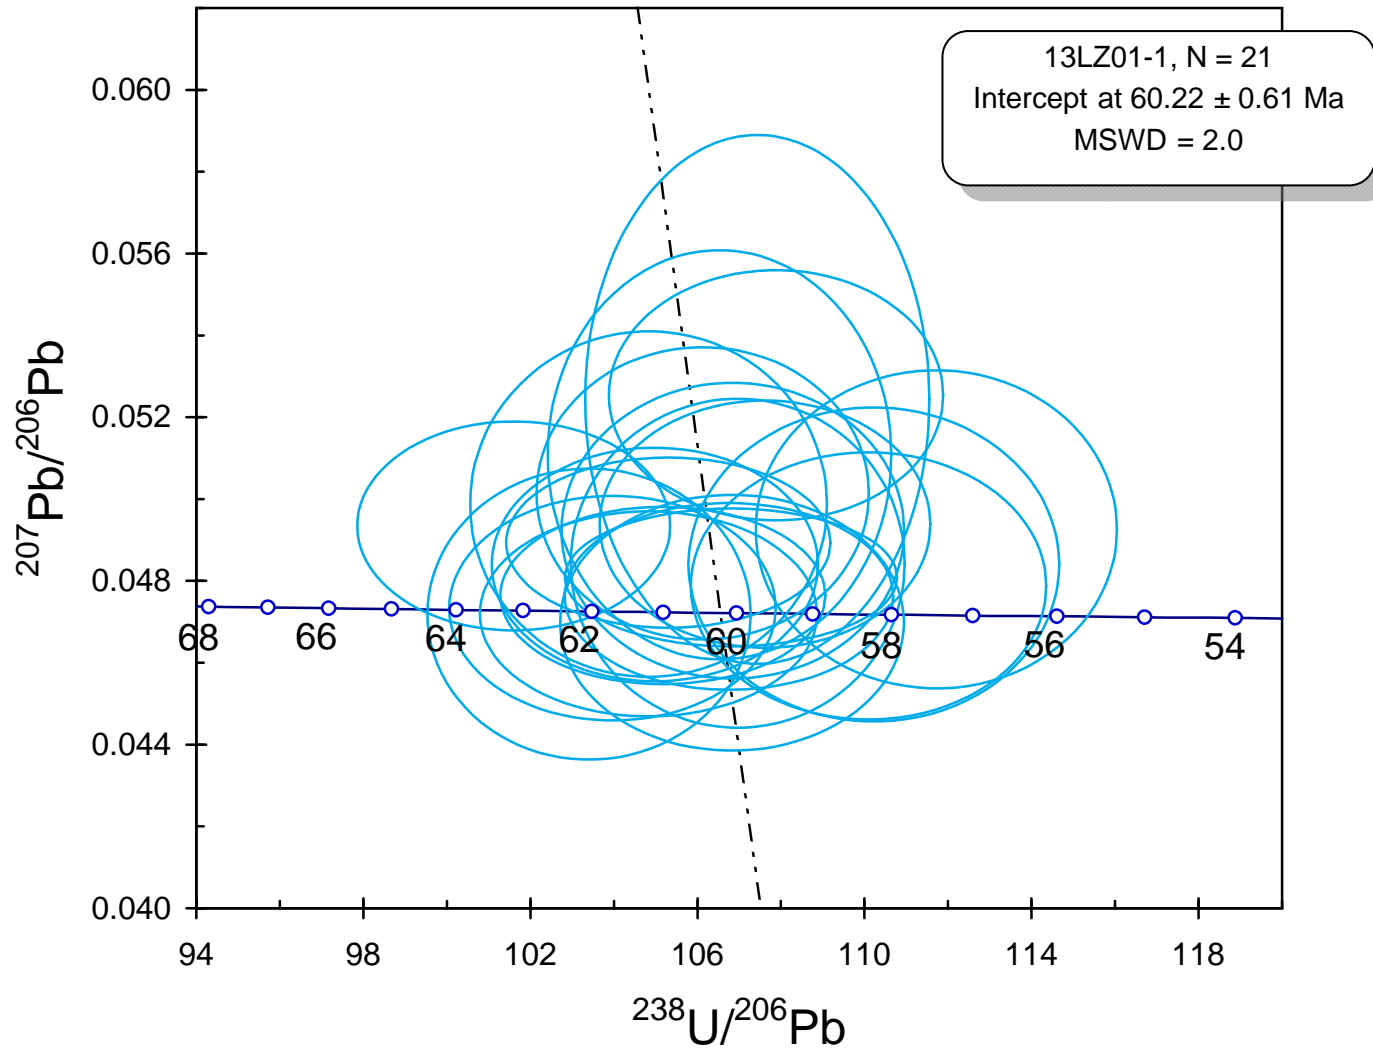

### Concordia plots for single zircon analyzed by SIMS 1280 U–Pb dating

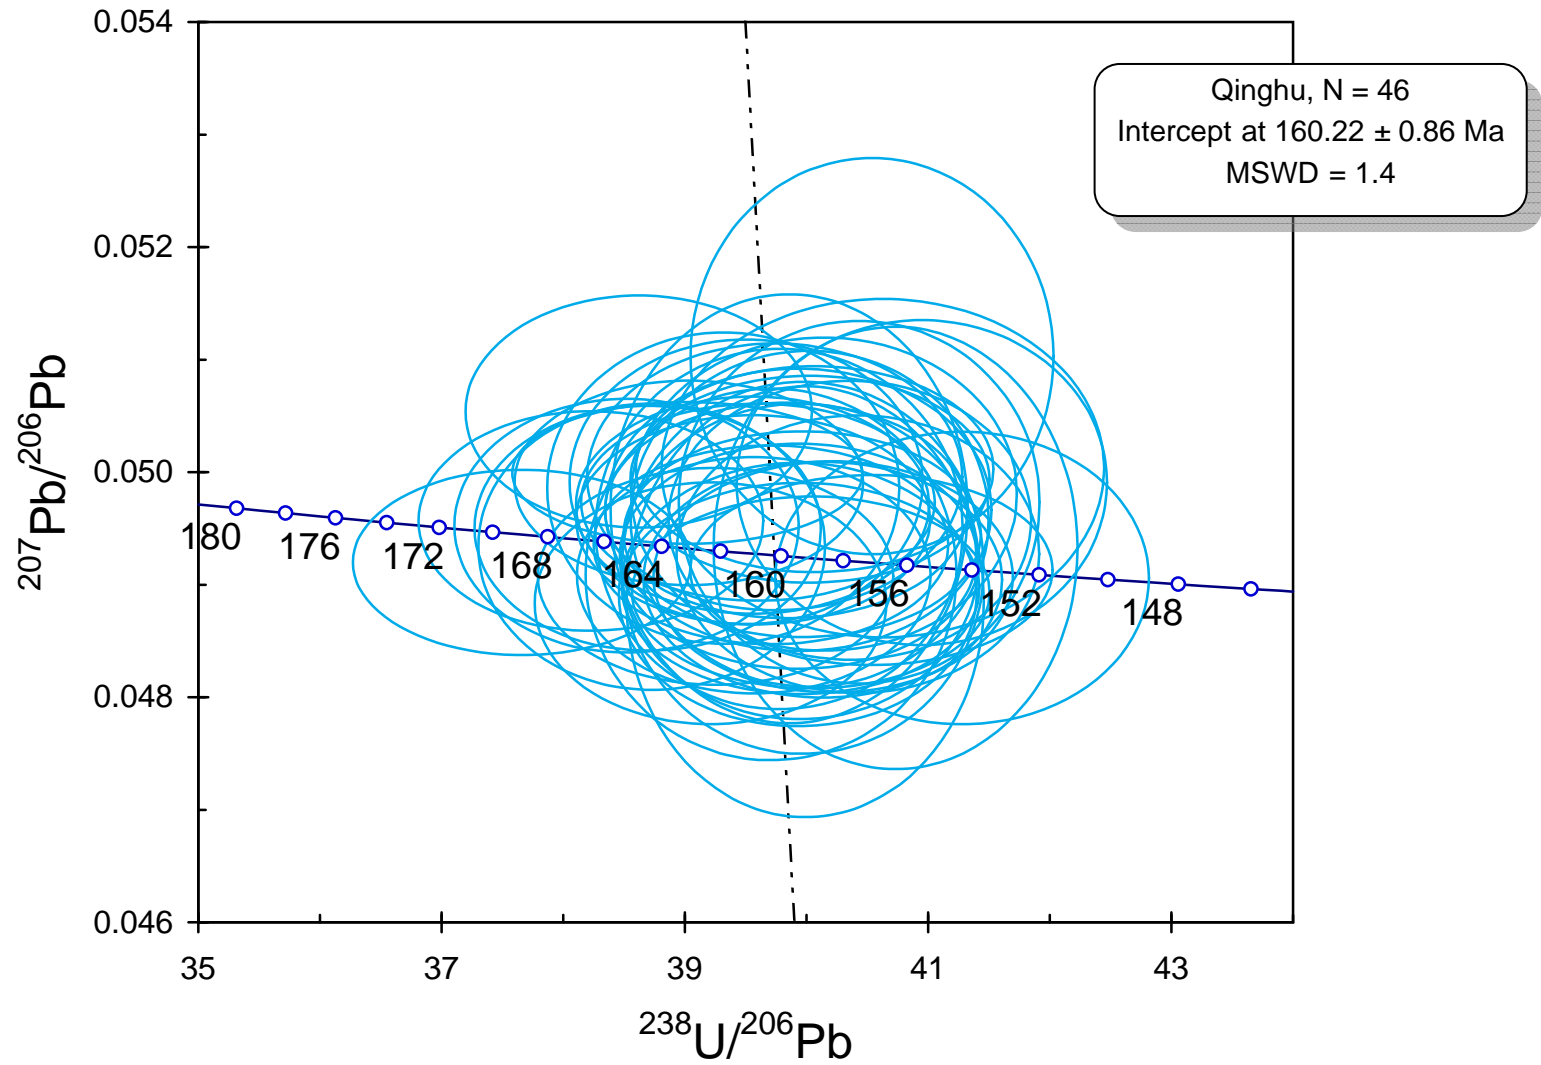

## Magmatic record of India-Asia collision

Di-Cheng Zhu\*, Qing Wang, Zhi-Dan Zhao, Sun-Lin Chung, Peter A. Cawood, Yaoling Niu, Sheng-Ao Liu, Fu-Yuan Wu, and Xuan-Xue Mo

**Table S1** Zircon SIMS U-Pb age data reported in this study for the Linzizong volcanic rocks in Linzhou Basin

| Sample/<br>spot # | [U]  | [Th] | [Pb] | Th/U | <i>TW concordia columns (Pbc uncorr.)</i> |                  | <i>TW concordia columns (Pbc uncorr.)</i> |                  | 207-corr | $\pm\sigma$ |
|-------------------|------|------|------|------|-------------------------------------------|------------------|-------------------------------------------|------------------|----------|-------------|
|                   | ppm  | ppm  | ppm  | meas | <sup>238</sup> U<br><sup>206</sup> Pb     | $\pm\sigma$<br>% | <sup>207</sup> Pb<br><sup>206</sup> Pb    | $\pm\sigma$<br>% | age (Ma) |             |
| 13LZ01-1@2        | 1717 | 1795 | 23   | 1.05 | 105.301                                   | 1.51             | 0.04894                                   | 1.74             | 60.8     | 0.9         |
| 13LZ01-1@4        | 475  | 324  | 6    | 0.68 | 107.433                                   | 1.57             | 0.05243                                   | 5.04             | 59.3     | 1.0         |
| 13LZ01-1@5        | 1268 | 1066 | 16   | 0.84 | 103.404                                   | 1.53             | 0.04719                                   | 3.08             | 62.0     | 1.0         |
| 13LZ01-1@6        | 1396 | 1487 | 19   | 1.06 | 103.966                                   | 1.54             | 0.04733                                   | 2.37             | 61.7     | 0.9         |
| 13LZ01-1@7        | 503  | 314  | 6    | 0.63 | 110.225                                   | 1.64             | 0.04840                                   | 3.24             | 58.1     | 1.0         |
| 13LZ01-1@8        | 812  | 715  | 10   | 0.88 | 107.618                                   | 1.50             | 0.04939                                   | 2.50             | 59.5     | 0.9         |
| 13LZ01-1@9        | 671  | 321  | 7    | 0.48 | 106.126                                   | 1.53             | 0.05014                                   | 2.91             | 60.2     | 0.9         |
| 13LZ01-1@10       | 695  | 491  | 8    | 0.71 | 110.097                                   | 1.58             | 0.04788                                   | 2.79             | 58.2     | 0.9         |
| 13LZ01-1@11       | 358  | 217  | 4    | 0.61 | 106.528                                   | 1.58             | 0.05108                                   | 4.00             | 59.9     | 1.0         |
| 13LZ01-1@12       | 906  | 918  | 12   | 1.01 | 106.829                                   | 1.57             | 0.04698                                   | 2.72             | 60.1     | 0.9         |
| 13LZ01-1@13       | 1076 | 1034 | 14   | 0.96 | 104.978                                   | 1.52             | 0.04840                                   | 2.41             | 61.0     | 0.9         |
| 13LZ01-1@15       | 889  | 1417 | 13   | 1.59 | 104.828                                   | 1.67             | 0.04988                                   | 3.46             | 61.0     | 1.0         |
| 13LZ01-1@16       | 1025 | 866  | 13   | 0.85 | 106.964                                   | 1.53             | 0.04843                                   | 3.39             | 59.9     | 0.9         |
| 13LZ01-1@17       | 925  | 1025 | 12   | 1.11 | 106.847                                   | 1.57             | 0.04923                                   | 3.00             | 59.9     | 0.9         |
| 13LZ01-1@18       | 2720 | 4708 | 41   | 1.73 | 106.807                                   | 1.52             | 0.04809                                   | 1.43             | 60.0     | 0.9         |
| 13LZ01-1@21       | 1643 | 2454 | 24   | 1.49 | 105.173                                   | 1.51             | 0.04765                                   | 1.86             | 61.0     | 0.9         |
| 13LZ01-1@22       | 1156 | 1387 | 15   | 1.20 | 107.880                                   | 1.52             | 0.05254                                   | 2.38             | 59.1     | 0.9         |
| 13LZ01-1@23       | 1347 | 1414 | 18   | 1.05 | 106.754                                   | 1.50             | 0.04762                                   | 1.96             | 60.1     | 0.9         |
| 13LZ01-1@24       | 1085 | 989  | 14   | 0.91 | 104.827                                   | 1.57             | 0.04719                                   | 2.17             | 61.2     | 1.0         |
| 13LZ01-1@1        | 644  | 366  | 7    | 0.57 | 111.719                                   | 1.58             | 0.04926                                   | 3.22             | 57.3     | 0.9         |
| 13LZ01-1@20       | 2663 | 4097 | 40   | 1.54 | 101.599                                   | 1.51             | 0.04934                                   | 2.11             | 63.0     | 0.9         |
| 13LZ01-1@14       | 1535 | 1750 | 18   | 1.14 | 114.101                                   | 6.37             | 0.05007                                   | 8.96             | 56.0     | 3.6         |
| 13LZ01-1@3        | 2194 | 1803 | 30   | 0.82 | 94.779                                    | 1.51             | 0.04766                                   | 1.48             | 67.6     | 1.0         |
| 13LZ01-1@19       | 3730 | 1639 | 210  | 0.44 | 21.015                                    | 1.50             | 0.05270                                   | 0.57             | 299.5    | 4.4         |
| 13LZ04-1@1        | 664  | 624  | 7    | 0.94 | 125.275                                   | 1.55             | 0.04769                                   | 1.97             | 51.2     | 0.8         |
| 13LZ04-1@2        | 814  | 811  | 9    | 1.00 | 125.571                                   | 1.50             | 0.04871                                   | 1.83             | 51.0     | 0.8         |
| 13LZ04-1@3        | 871  | 631  | 9    | 0.73 | 123.858                                   | 1.51             | 0.04797                                   | 2.97             | 51.8     | 0.8         |
| 13LZ04-1@4        | 1860 | 732  | 18   | 0.39 | 123.791                                   | 1.50             | 0.04872                                   | 1.15             | 51.8     | 0.8         |
| 13LZ04-1@5        | 1070 | 726  | 11   | 0.68 | 126.203                                   | 1.53             | 0.04709                                   | 1.52             | 50.9     | 0.8         |



|                        |                 |                 |               |                 |                    |                 |                    |                 |                 |                |
|------------------------|-----------------|-----------------|---------------|-----------------|--------------------|-----------------|--------------------|-----------------|-----------------|----------------|
| 13LZ04-1@6             | 868             | 710             | 9             | 0.82            | 122.853            | 1.50            | 0.04747            | 1.86            | 52.2            | 0.8            |
| <u>13LZ04-1@8</u>      | 2269            | 1981            | 25            | 0.87            | 120.824            | 1.53            | 0.04820            | 0.99            | 53.1            | 0.8            |
| 13LZ04-1@9             | 739             | 437             | 7             | 0.59            | 124.374            | 1.53            | 0.04781            | 1.74            | 51.6            | 0.8            |
| 13LZ04-1@10            | 1663            | 3474            | 24            | 2.09            | 120.983            | 1.52            | 0.04735            | 1.45            | 53.0            | 0.8            |
| 13LZ04-1@11            | 918             | 640             | 9             | 0.70            | 125.435            | 1.53            | 0.04918            | 1.59            | 51.0            | 0.8            |
| 13LZ04-1@13            | 654             | 368             | 6             | 0.56            | 125.413            | 1.54            | 0.04840            | 2.01            | 51.1            | 0.8            |
| 13LZ04-1@18            | 2337            | 1661            | 24            | 0.71            | 121.479            | 1.53            | 0.04667            | 1.73            | 52.9            | 0.8            |
| 13LZ04-1@22            | 895             | 675             | 9             | 0.75            | 126.802            | 1.66            | 0.04708            | 3.62            | 50.6            | 0.8            |
| 13LZ04-1@19            | 2012            | 3024            | 26            | 1.50            | 119.980            | 1.53            | 0.04816            | 1.77            | 53.4            | 0.8            |
| 13LZ04-1@20            | 993             | 1350            | 12            | 1.36            | 123.281            | 1.55            | 0.04757            | 4.03            | 52.0            | 0.8            |
| 13LZ04-1@21            | 1030            | 886             | 11            | 0.86            | 122.823            | 1.56            | 0.05205            | 2.46            | 51.9            | 0.8            |
| 13LZ04-1@12            | 1523            | 1019            | 16            | 0.67            | 118.649            | 1.54            | 0.04758            | 1.23            | 54.1            | 0.8            |
| 13LZ04-1@14            | 1468            | 984             | 16            | 0.67            | 116.904            | 1.51            | 0.04610            | 1.52            | 55.0            | 0.8            |
| 13LZ04-1@15            | 347             | 260             | 4             | 0.75            | 117.612            | 1.79            | 0.04783            | 2.83            | 54.5            | 1.0            |
| <del>13LZ04-1@17</del> | <del>808</del>  | <del>1065</del> | <del>9</del>  | <del>1.32</del> | <del>121.052</del> | <del>1.56</del> | <del>0.06374</del> | <del>3.61</del> | <del>51.9</del> | <del>0.8</del> |
| <del>13LZ04-1@7</del>  | <del>2258</del> | <del>3821</del> | <del>32</del> | <del>1.69</del> | <del>111.222</del> | <del>1.51</del> | <del>0.06321</del> | <del>1.81</del> | <del>56.5</del> | <del>0.9</del> |
| <del>13LZ04-1@16</del> | <del>3702</del> | <del>2849</del> | <del>35</del> | <del>0.77</del> | <del>126.016</del> | <del>1.50</del> | <del>0.07698</del> | <del>1.40</del> | <del>49.0</del> | <del>0.8</del> |
| 13LZ05-1@1             | 669             | 472             | 7             | 0.71            | 123.950            | 1.59            | 0.04715            | 3.78            | 51.8            | 0.8            |
| 13LZ05-1@2             | 3372            | 2482            | 35            | 0.74            | 121.663            | 1.51            | 0.04989            | 1.48            | 52.6            | 0.8            |
| 13LZ05-1@3             | 3570            | 6392            | 47            | 1.79            | 120.832            | 1.50            | 0.04695            | 1.47            | 53.1            | 0.8            |
| 13LZ05-1@4             | 1087            | 799             | 11            | 0.73            | 122.072            | 1.61            | 0.04930            | 3.20            | 52.4            | 0.8            |
| 13LZ05-1@5             | 2920            | 2191            | 32            | 0.75            | 117.553            | 1.53            | 0.04981            | 1.51            | 54.4            | 0.8            |
| 13LZ05-1@6             | 537             | 559             | 6             | 1.04            | 122.971            | 1.67            | 0.04658            | 3.50            | 52.2            | 0.9            |
| 13LZ05-1@7             | 1430            | 913             | 15            | 0.64            | 120.838            | 1.53            | 0.04447            | 2.57            | 53.3            | 0.8            |
| 13LZ05-1@8             | 1913            | 2980            | 25            | 1.56            | 119.378            | 1.53            | 0.04707            | 1.82            | 53.8            | 0.8            |
| 13LZ05-1@9             | 1116            | 766             | 11            | 0.69            | 122.124            | 1.56            | 0.04897            | 3.28            | 52.4            | 0.8            |
| 13LZ05-1@10            | 917             | 1318            | 11            | 1.44            | 123.856            | 1.52            | 0.04635            | 2.82            | 51.9            | 0.8            |
| 13LZ05-1@11            | 990             | 808             | 10            | 0.82            | 123.670            | 1.56            | 0.04731            | 2.73            | 51.9            | 0.8            |
| 13LZ05-1@12            | 4269            | 4381            | 48            | 1.03            | 121.921            | 1.50            | 0.04775            | 1.56            | 52.6            | 0.8            |
| 13LZ05-1@13            | 1188            | 948             | 13            | 0.80            | 119.315            | 1.56            | 0.04766            | 2.51            | 53.8            | 0.8            |
| 13LZ05-1@14            | 2508            | 1773            | 26            | 0.71            | 122.744            | 1.62            | 0.04921            | 1.76            | 52.2            | 0.8            |
| 13LZ05-1@17            | 1349            | 1271            | 14            | 0.94            | 124.881            | 1.62            | 0.05042            | 2.20            | 51.2            | 0.8            |
| 13LZ05-1@18            | 2333            | 2276            | 25            | 0.98            | 125.816            | 1.50            | 0.04744            | 2.56            | 51.0            | 0.8            |
| <del>13LZ05-1@15</del> | <del>1195</del> | <del>994</del>  | <del>12</del> | <del>0.83</del> | <del>122.167</del> | <del>1.56</del> | <del>0.05991</del> | <del>2.19</del> | <del>51.7</del> | <del>0.8</del> |
| <del>13LZ05-1@16</del> | <del>730</del>  | <del>505</del>  | <del>7</del>  | <del>0.69</del> | <del>126.497</del> | <del>1.60</del> | <del>0.06233</del> | <del>4.65</del> | <del>49.8</del> | <del>0.8</del> |

|             |      |      |         |      |         |      |         |      |      |     |
|-------------|------|------|---------|------|---------|------|---------|------|------|-----|
| 12LZ13-1@02 | 395  | 246  | no data | 0.62 | 112.493 | 1.56 | 0.09647 | 3.08 | 53.5 | 1.0 |
| 12LZ13-1@06 | 850  | 996  | 9       | 1.17 | 113.172 | 1.51 | 0.10158 | 2.00 | 52.8 | 1.0 |
| 12LZ13-1@16 | 829  | 636  | 8       | 0.77 | 114.128 | 1.51 | 0.09523 | 2.09 | 52.8 | 0.9 |
| 12LZ13-1@1  | 345  | 198  | no data | 0.57 | 114.440 | 1.66 | 0.06933 | 4.00 | 54.5 | 0.9 |
| 12LZ13-1@21 | 292  | 204  | 3       | 0.70 | 109.925 | 1.60 | 0.09313 | 3.15 | 55.0 | 1.0 |
| 12LZ13-1@23 | 895  | 616  | 10      | 0.69 | 112.201 | 1.53 | 0.08383 | 1.36 | 54.5 | 0.9 |
| 12LZ13-1@05 | 1272 | 1323 | 15      | 1.04 | 110.945 | 1.54 | 0.08766 | 3.27 | 54.9 | 0.9 |
| 12LZ13-1@14 | 497  | 351  | 5       | 0.71 | 114.666 | 1.51 | 0.07076 | 2.99 | 54.3 | 0.9 |
| 12LZ13-1@08 | 510  | 406  | 5       | 0.80 | 117.979 | 1.62 | 0.04745 | 3.44 | 54.4 | 0.9 |
| 12LZ13-1@17 | 318  | 251  | 4       | 0.79 | 117.003 | 1.68 | 0.05438 | 2.73 | 54.4 | 0.9 |
| 12LZ13-1@09 | 1319 | 1163 | 15      | 0.88 | 115.406 | 1.51 | 0.05179 | 2.07 | 55.3 | 0.8 |
| 12LZ13-1@15 | 526  | 427  | 6       | 0.81 | 114.732 | 1.50 | 0.05135 | 4.36 | 55.6 | 0.9 |
| 12LZ13-1@18 | 221  | 191  | 2       | 0.87 | 120.363 | 1.65 | 0.05019 | 3.54 | 53.1 | 0.9 |
| 12LZ13-1@20 | 209  | 159  | 2       | 0.76 | 116.348 | 1.78 | 0.04697 | 4.25 | 55.2 | 1.0 |
| 12LZ13-1@19 | 1304 | 1007 | 15      | 0.77 | 108.954 | 1.58 | 0.05203 | 1.37 | 58.5 | 0.9 |
| 12LZ13-1@07 | 3609 | 2187 | 40      | 0.61 | 110.109 | 1.51 | 0.04854 | 1.31 | 58.2 | 0.9 |
| 12LZ13-1@12 | 542  | 748  | [-5]    | 1.38 | 67.986  | 3.13 | 0.41662 | 4.29 | 49.9 | 6.3 |
| 12LZ13-1@11 | 628  | 466  | 6       | 0.74 | 68.966  | 4.92 | 0.37724 | 7.31 | 53.8 | 6.5 |
| 12LZ13-1@04 | 755  | 662  | no data | 0.88 | 91.045  | 1.64 | 0.26516 | 1.79 | 50.9 | 2.7 |
| 12LZ13-1@13 | 589  | 383  | [-5]    | 0.65 | 101.675 | 1.50 | 0.20308 | 1.65 | 50.6 | 1.8 |
| 12LZ13-1@22 | 799  | 604  | 14      | 0.75 | 73.219  | 1.53 | 0.05134 | 1.42 | 87.0 | 1.3 |
| 12LZ13-1@10 | 821  | 539  | 14      | 0.66 | 67.910  | 1.51 | 0.09360 | 2.80 | 88.8 | 1.5 |
| 12LZ13-1@03 | 587  | 878  | 13      | 1.50 | 68.491  | 1.52 | 0.05427 | 2.48 | 92.7 | 1.4 |
| 12LZ14-1@02 | 1011 | 333  | no data | 0.33 | 109.879 | 1.51 | 0.13648 | 2.39 | 51.8 | 1.2 |
| 12LZ14-1@07 | 798  | 526  | 8       | 0.66 | 110.730 | 1.52 | 0.13059 | 4.76 | 51.8 | 1.2 |
| 12LZ14-1@15 | 1475 | 805  | 14      | 0.55 | 120.503 | 1.50 | 0.06070 | 2.43 | 52.4 | 0.8 |
| 12LZ14-1@16 | 904  | 649  | 9       | 0.72 | 113.498 | 1.53 | 0.10297 | 4.35 | 52.5 | 1.0 |
| 12LZ14-1@13 | 1959 | 961  | 18      | 0.49 | 119.280 | 1.50 | 0.06127 | 1.95 | 52.8 | 0.8 |
| 12LZ14-1@10 | 1538 | 851  | 15      | 0.55 | 116.805 | 1.50 | 0.06463 | 2.06 | 53.7 | 0.8 |
| 12LZ14-1@12 | 1067 | 346  | 10      | 0.32 | 117.616 | 1.53 | 0.04854 | 2.58 | 54.5 | 0.8 |
| 12LZ14-1@1  | 828  | 423  | 9       | 0.51 | 116.628 | 1.54 | 0.04786 | 3.99 | 55.0 | 0.9 |
| 12LZ14-1@14 | 853  | 1460 | 11      | 1.71 | 116.127 | 1.58 | 0.04826 | 2.92 | 55.2 | 0.9 |
| 12LZ14-1@03 | 1844 | 1205 | 19      | 0.65 | 114.543 | 1.62 | 0.05044 | 2.07 | 55.8 | 0.9 |
| 12LZ14-1@11 | 420  | 227  | [-2]    | 0.54 | 92.538  | 4.46 | 0.55822 | 4.34 | 24.1 | 6.3 |
| 12LZ14-1@05 | 1592 | 1292 | [-12]   | 0.81 | 119.331 | 1.88 | 0.28164 | 1.68 | 37.7 | 2.2 |
| 12LZ14-1@08 | 885  | 362  | [-7]    | 0.41 | 100.858 | 2.42 | 0.29904 | 3.15 | 43.2 | 2.9 |
| 12LZ14-1@09 | 790  | 707  | no data | 0.89 | 113.755 | 1.50 | 0.20304 | 3.30 | 45.2 | 1.7 |

|                    |      |      |    |      |         |      |         |       |       |     |
|--------------------|------|------|----|------|---------|------|---------|-------|-------|-----|
| 12LZ14-1@04        | 1792 | 1497 | 16 | 0.84 | 95.384  | 1.60 | 0.26339 | 3.00  | 48.7  | 2.6 |
| 12LZ14-1@06        | 763  | 217  | 48 | 0.28 | 17.857  | 1.54 | 0.05584 | 1.26  | 350.2 | 5.3 |
| <b>13LZ16-1@1</b>  | 437  | 659  | 6  | 1.51 | 118.043 | 1.55 | 0.04861 | 2.09  | 54.3  | 0.8 |
| <b>13LZ16-1@15</b> | 705  | 776  | 8  | 1.10 | 123.590 | 1.52 | 0.04791 | 1.65  | 51.9  | 0.8 |
| <b>13LZ16-1@16</b> | 436  | 534  | 5  | 1.22 | 123.823 | 1.53 | 0.04770 | 3.37  | 51.8  | 0.8 |
| <b>13LZ16-1@17</b> | 205  | 156  | 2  | 0.76 | 120.018 | 1.64 | 0.05612 | 3.30  | 52.9  | 0.9 |
| 13LZ16-1@4         | 625  | 292  | 8  | 0.47 | 93.635  | 1.53 | 0.04849 | 1.55  | 68.4  | 1.0 |
| 13LZ16-1@5         | 233  | 295  | 4  | 1.27 | 92.295  | 1.62 | 0.04772 | 2.64  | 69.4  | 1.1 |
| 13LZ16-1@6         | 975  | 852  | 13 | 0.87 | 97.197  | 1.67 | 0.04870 | 1.31  | 65.9  | 1.1 |
| 13LZ16-1@7         | 489  | 194  | 6  | 0.40 | 92.893  | 1.51 | 0.04717 | 1.77  | 69.0  | 1.0 |
| 13LZ16-1@8         | 915  | 772  | 13 | 0.84 | 93.934  | 1.51 | 0.04711 | 1.95  | 68.3  | 1.0 |
| 13LZ16-1@10        | 1380 | 1471 | 20 | 1.07 | 93.985  | 1.51 | 0.04678 | 1.18  | 68.3  | 1.0 |
| 13LZ16-1@13        | 665  | 436  | 9  | 0.66 | 95.934  | 1.50 | 0.04764 | 2.65  | 66.8  | 1.0 |
| 13LZ16-1@14        | 725  | 342  | 9  | 0.47 | 95.731  | 1.51 | 0.04975 | 1.43  | 66.8  | 1.0 |
| 13LZ16-1@18        | 498  | 226  | 7  | 0.45 | 91.134  | 1.50 | 0.04751 | 1.73  | 70.3  | 1.1 |
| 13LZ16-1@3         | 346  | 201  | 4  | 0.58 | 97.425  | 1.59 | 0.05074 | 2.08  | 65.5  | 1.0 |
| 13LZ16-1@11        | 1258 | 1281 | 18 | 1.02 | 95.173  | 1.51 | 0.05073 | 1.48  | 67.1  | 1.0 |
| 13LZ16-1@2         | 1421 | 2137 | 23 | 1.50 | 88.800  | 1.74 | 0.06841 | 17.99 | 70.3  | 1.7 |
| 13LZ16-1@12        | 564  | 359  | 6  | 0.64 | 96.311  | 2.00 | 0.10216 | 4.62  | 61.9  | 1.4 |
| 13LZ16-1@9         | 435  | 861  | 8  | 1.98 | 58.047  | 5.33 | 0.32544 | 10.40 | 71.2  | 7.9 |
| 13LZ17-1@01        | 306  | 166  | 3  | 0.54 | 109.633 | 1.57 | 0.04727 | 2.97  | 58.5  | 0.9 |
| 13LZ17-1@04        | 298  | 168  | 3  | 0.56 | 108.188 | 1.63 | 0.05731 | 2.67  | 58.5  | 1.0 |
| 13LZ17-1@11        | 429  | 302  | 5  | 0.70 | 109.025 | 1.60 | 0.04718 | 2.54  | 58.9  | 0.9 |
| 13LZ17-1@07        | 176  | 83   | 2  | 0.47 | 108.529 | 1.65 | 0.04633 | 4.04  | 59.2  | 1.0 |
| 13LZ17-1@05        | 229  | 123  | 3  | 0.54 | 107.053 | 1.60 | 0.05054 | 3.39  | 59.7  | 1.0 |
| 13LZ17-1@16        | 600  | 443  | 7  | 0.74 | 106.210 | 1.60 | 0.05416 | 2.10  | 59.9  | 1.0 |
| 13LZ17-1@02        | 402  | 321  | 5  | 0.80 | 106.882 | 1.55 | 0.04792 | 2.99  | 60.0  | 0.9 |
| 13LZ17-1@13        | 198  | 134  | 2  | 0.68 | 105.902 | 1.64 | 0.04928 | 4.30  | 60.4  | 1.0 |
| 13LZ17-1@14        | 755  | 583  | 9  | 0.77 | 105.957 | 1.53 | 0.04856 | 3.20  | 60.5  | 0.9 |
| 13LZ17-1@09        | 407  | 173  | 5  | 0.42 | 105.860 | 1.57 | 0.04787 | 2.88  | 60.6  | 1.0 |
| 13LZ17-1@17        | 465  | 219  | 5  | 0.47 | 103.713 | 1.66 | 0.04886 | 2.54  | 61.7  | 1.0 |
| 13LZ17-1@20        | 324  | 135  | 4  | 0.42 | 103.210 | 1.56 | 0.04930 | 2.98  | 62.0  | 1.0 |
| 13LZ17-1@10        | 1418 | 1064 | 18 | 0.75 | 102.794 | 1.51 | 0.04717 | 1.39  | 62.4  | 0.9 |
| 13LZ17-1@19        | 100  | 66   | 2  | 0.66 | 61.630  | 1.62 | 0.04618 | 4.28  | 104.0 | 1.7 |
| 13LZ17-1@08        | 394  | 192  | 8  | 0.49 | 60.541  | 1.54 | 0.04885 | 2.11  | 105.5 | 1.6 |
| 13LZ17-1@12        | 121  | 168  | 4  | 1.39 | 51.491  | 1.56 | 0.04850 | 3.93  | 124.0 | 1.9 |

|                             |                 |                 |               |                 |                    |                 |                    |                 |                 |                |
|-----------------------------|-----------------|-----------------|---------------|-----------------|--------------------|-----------------|--------------------|-----------------|-----------------|----------------|
| 13LZ17-1@06                 | 375             | 213             | 9             | 0.57            | 49.593             | 1.52            | 0.05080            | 1.70            | 128.3           | 1.9            |
| 13LZ17-1@18                 | 196             | 131             | 6             | 0.67            | 40.695             | 1.53            | 0.04909            | 3.00            | 156.5           | 2.4            |
| 13LZ17-1@03                 | 349             | 133             | 20            | 0.38            | 20.901             | 1.50            | 0.05267            | 1.13            | 301.2           | 4.5            |
| 13LZ17-1@15                 | 1074            | 742             | 67            | 0.69            | 20.313             | 1.50            | 0.05213            | 0.71            | 310.0           | 4.6            |
| 12LZ25-1@16                 | 1255            | 1526            | 15            | 1.22            | 122.992            | 1.52            | 0.04882            | 1.46            | 52.1            | 0.8            |
| <a href="#">12LZ25-1@15</a> | 522             | 531             | 6             | 1.02            | 121.911            | 1.59            | 0.04644            | 2.86            | 52.7            | 0.8            |
| 12LZ25-1@14                 | 512             | 515             | 6             | 1.01            | 123.722            | 1.54            | 0.04968            | 3.61            | 51.7            | 0.8            |
| 12LZ25-1@13                 | 619             | 732             | 7             | 1.18            | 123.955            | 1.56            | 0.04865            | 2.31            | 51.7            | 0.8            |
| 12LZ25-1@08                 | 474             | 518             | 5             | 1.09            | 121.635            | 1.71            | 0.06249            | 3.61            | 51.7            | 0.9            |
| 12LZ25-1@11                 | 1361            | 2233            | 18            | 1.64            | 122.104            | 1.59            | 0.04730            | 1.51            | 52.6            | 0.8            |
| 12LZ25-1@10                 | 3176            | 870             | 30            | 0.27            | 119.616            | 1.59            | 0.04739            | 0.99            | 53.6            | 0.9            |
| 12LZ25-1@07                 | 348             | 315             | 4             | 0.91            | 122.554            | 1.66            | 0.05012            | 2.72            | 52.2            | 0.9            |
| 12LZ25-1@06                 | 857             | 863             | 10            | 1.01            | 119.582            | 1.58            | 0.04643            | 2.04            | 53.7            | 0.9            |
| 12LZ25-1@03                 | 928             | 1209            | 11            | 1.30            | 122.673            | 1.54            | 0.05649            | 3.16            | 51.7            | 0.8            |
| 12LZ25-1@05                 | 356             | 576             | 4             | 1.62            | 122.686            | 1.50            | 0.05881            | 4.46            | 51.5            | 0.8            |
| 12LZ25-1@04                 | 1290            | 1797            | 15            | 1.39            | 122.518            | 1.57            | 0.05530            | 2.74            | 51.9            | 0.8            |
| 12LZ25-1@1                  | 805             | 1206            | 9             | 1.50            | 122.838            | 1.70            | 0.04802            | 3.12            | 52.2            | 0.9            |
| <del>12LZ25-1@09</del>      | <del>1830</del> | <del>1943</del> | <del>22</del> | <del>1.06</del> | <del>115.528</del> | <del>1.60</del> | <del>0.06726</del> | <del>3.53</del> | <del>54.1</del> | <del>0.9</del> |
| <del>12LZ25-1@02</del>      | <del>687</del>  | <del>1052</del> | <del>8</del>  | <del>1.53</del> | <del>126.135</del> | <del>1.54</del> | <del>0.05114</del> | <del>3.32</del> | <del>50.6</del> | <del>0.8</del> |
| <del>12LZ25-1@12</del>      | <del>580</del>  | <del>767</del>  | <del>7</del>  | <del>1.32</del> | <del>119.202</del> | <del>1.58</del> | <del>0.06250</del> | <del>9.57</del> | <del>52.8</del> | <del>0.9</del> |
| 12LZ27-1@15                 | 648             | 532             | 7             | 0.82            | 122.775            | 1.56            | 0.04874            | 2.07            | 52.2            | 0.8            |
| 12LZ27-1@14                 | 346             | 396             | 4             | 1.15            | 123.629            | 1.58            | 0.04870            | 2.88            | 51.8            | 0.8            |
| 12LZ27-1@13                 | 1540            | 1124            | 17            | 0.73            | 120.481            | 1.52            | 0.04680            | 1.69            | 53.3            | 0.8            |
| 12LZ27-1@12                 | 1003            | 624             | 11            | 0.62            | 120.158            | 1.52            | 0.04632            | 1.71            | 53.5            | 0.8            |
| 12LZ27-1@11                 | 1547            | 1586            | 18            | 1.03            | 119.830            | 1.53            | 0.04772            | 1.58            | 53.5            | 0.8            |
| <a href="#">12LZ27-1@10</a> | 864             | 888             | 10            | 1.03            | 121.922            | 1.53            | 0.04837            | 1.84            | 52.6            | 0.8            |
| <a href="#">12LZ27-1@09</a> | 627             | 748             | 8             | 1.19            | 122.723            | 1.62            | 0.04799            | 2.06            | 52.3            | 0.8            |
| 12LZ27-1@08                 | 598             | 725             | 7             | 1.21            | 120.978            | 1.54            | 0.04664            | 2.13            | 53.1            | 0.8            |
| 12LZ27-1@07                 | 1318            | 947             | 14            | 0.72            | 123.416            | 1.67            | 0.04701            | 1.45            | 52.0            | 0.9            |
| 12LZ27-1@06                 | 683             | 525             | 7             | 0.77            | 121.753            | 1.57            | 0.04773            | 1.98            | 52.7            | 0.8            |
| 12LZ27-1@05                 | 610             | 677             | 7             | 1.11            | 122.872            | 1.55            | 0.04913            | 2.11            | 52.1            | 0.8            |
| 12LZ27-1@04                 | 643             | 802             | 8             | 1.25            | 122.039            | 1.55            | 0.04849            | 2.07            | 52.5            | 0.8            |
| 12LZ27-1@03                 | 1472            | 942             | 15            | 0.64            | 121.065            | 1.51            | 0.04864            | 1.35            | 52.9            | 0.8            |
| 12LZ27-1@02                 | 228             | 167             | 2             | 0.73            | 123.920            | 1.65            | 0.04734            | 3.49            | 51.8            | 0.9            |
| 12LZ27-1@1                  | 981             | 997             | 11            | 1.02            | 121.556            | 1.53            | 0.04728            | 1.70            | 52.8            | 0.8            |
| <del>12LZ27-1@17</del>      | <del>159</del>  | <del>114</del>  | <del>2</del>  | <del>0.72</del> | <del>126.116</del> | <del>1.73</del> | <del>0.04523</del> | <del>4.39</del> | <del>51.0</del> | <del>0.9</del> |

|                             |      |      |    |      |         |      |         |      |      |     |
|-----------------------------|------|------|----|------|---------|------|---------|------|------|-----|
| 12LZ27-1@16                 | 462  | 449  | 2  | 0.74 | 419.454 | 1.67 | 0.04604 | 4.71 | 53.8 | 0.9 |
| 12LZ29-1@07                 | 1926 | 982  | 21 | 0.51 | 113.334 | 1.54 | 0.04716 | 2.11 | 56.6 | 0.9 |
| 12LZ29-1@05                 | 2185 | 2082 | 26 | 0.95 | 113.938 | 1.50 | 0.04755 | 1.25 | 56.3 | 0.8 |
| 12LZ29-1@08                 | 1466 | 1067 | 16 | 0.73 | 114.938 | 1.50 | 0.04753 | 1.86 | 55.8 | 0.8 |
| 12LZ29-1@1                  | 1955 | 1656 | 22 | 0.85 | 115.763 | 1.50 | 0.04747 | 1.31 | 55.4 | 0.8 |
| 12LZ29-1@04                 | 1277 | 1822 | 17 | 1.43 | 115.611 | 1.53 | 0.04923 | 2.28 | 55.4 | 0.8 |
| 12LZ29-1@14                 | 887  | 576  | 10 | 0.65 | 115.937 | 1.59 | 0.04732 | 1.71 | 55.4 | 0.9 |
| <a href="#">12LZ29-1@13</a> | 934  | 538  | 10 | 0.58 | 115.953 | 1.54 | 0.04758 | 1.68 | 55.3 | 0.8 |
| 12LZ29-1@02                 | 1013 | 568  | 11 | 0.56 | 116.249 | 1.60 | 0.04740 | 1.80 | 55.2 | 0.9 |
| 12LZ29-1@10                 | 386  | 190  | 4  | 0.49 | 116.057 | 1.57 | 0.04887 | 4.00 | 55.2 | 0.9 |
| 12LZ29-1@06                 | 1369 | 1036 | 15 | 0.76 | 116.190 | 1.52 | 0.04886 | 1.48 | 55.1 | 0.8 |
| 12LZ29-1@11                 | 1131 | 741  | 12 | 0.66 | 116.566 | 1.53 | 0.04784 | 1.54 | 55.0 | 0.8 |
| 12LZ29-1@12                 | 500  | 334  | 5  | 0.67 | 117.096 | 1.57 | 0.04613 | 2.80 | 54.9 | 0.9 |
| 12LZ29-1@03                 | 621  | 364  | 7  | 0.59 | 117.074 | 1.56 | 0.04857 | 2.26 | 54.7 | 0.9 |
| 12LZ29-1@15                 | 840  | 785  | 10 | 0.94 | 117.515 | 1.54 | 0.04684 | 2.05 | 54.6 | 0.8 |
| 12LZ29-1@09                 | 830  | 844  | 12 | 1.02 | 97.539  | 1.51 | 0.04685 | 1.74 | 65.8 | 1.0 |

|             |      |      |     |       |         |      |         |      |        |      |
|-------------|------|------|-----|-------|---------|------|---------|------|--------|------|
| 13LZ08-1@1  | 525  | 391  | 6   | 0.74  | 109.796 | 1.60 | 0.04791 | 2.29 | 57.9   | 0.9  |
| 13LZ08-1@03 | 352  | 262  | 4   | 0.74  | 109.759 | 1.63 | 0.05012 | 2.35 | 57.7   | 0.9  |
| 13LZ08-1@04 | 1498 | 834  | 20  | 0.56  | 92.549  | 1.62 | 0.04959 | 1.02 | 68.5   | 1.1  |
| 13LZ08-1@12 | 1797 | 1518 | 25  | 0.85  | 93.967  | 1.57 | 0.05263 | 1.93 | 67.8   | 1.1  |
| 13LZ08-1@07 | 741  | 936  | 34  | 1.26  | 31.315  | 1.50 | 0.05109 | 1.02 | 200.6  | 3.0  |
| 13LZ08-1@06 | 2667 | 1033 | 100 | 0.39  | 30.949  | 1.50 | 0.05093 | 0.44 | 203.0  | 3.0  |
| 13LZ08-1@11 | 927  | 1094 | 42  | 1.18  | 31.127  | 1.50 | 0.05120 | 0.79 | 201.8  | 3.0  |
| 13LZ08-1@08 | 2573 | 1039 | 147 | 0.40  | 20.533  | 1.52 | 0.05248 | 0.37 | 303.9  | 4.6  |
| 13LZ08-1@10 | 935  | 468  | 221 | 0.501 | 5.236   | 1.59 | 0.08027 | 0.45 | 1112.7 | 17.1 |

*TW concordia columns (Pbc uncorr.)*

| Sample/<br>spot # | [U]<br>ppm | [Th]<br>ppm | [Pb]<br>ppm | Th/U<br>meas | <sup>238</sup> U<br><sup>206</sup> Pb | ±σ<br>% | <sup>207</sup> Pb<br><sup>206</sup> Pb | ±σ<br>% | 207-corr<br>age (Ma) | ±σ  |
|-------------------|------------|-------------|-------------|--------------|---------------------------------------|---------|----------------------------------------|---------|----------------------|-----|
| Qinghu@1          | 561        | 321         | 17          | 0.57         | 41.280                                | 1.52    | 0.04906                                | 1.08    | 154.3                | 2.3 |
| Qinghu@2          | 1065       | 389         | 31          | 0.37         | 39.561                                | 1.50    | 0.04958                                | 0.77    | 160.9                | 2.4 |
| Qinghu@3          | 1462       | 653         | 44          | 0.45         | 39.164                                | 1.50    | 0.05711                                | 0.67    | 160.9                | 2.4 |
| Qinghu@4          | 2587       | 1458        | 81          | 0.56         | 39.021                                | 1.51    | 0.04999                                | 0.51    | 163.0                | 2.4 |
| Qinghu@5          | 1132       | 320         | 32          | 0.28         | 39.600                                | 1.50    | 0.04973                                | 0.72    | 160.7                | 2.4 |
| Qinghu@11         | 1480       | 612         | 44          | 0.41         | 39.952                                | 1.50    | 0.04897                                | 0.78    | 159.4                | 2.4 |

|                     |                |                |               |                 |                   |                 |                    |                 |                  |                |
|---------------------|----------------|----------------|---------------|-----------------|-------------------|-----------------|--------------------|-----------------|------------------|----------------|
| Qinghu@10           | 1334           | 699            | 42            | 0.52            | 39.253            | 1.52            | 0.04907            | 0.80            | 162.2            | 2.4            |
| Qinghu@8            | 1344           | 536            | 40            | 0.40            | 39.556            | 1.50            | 0.04971            | 0.79            | 160.9            | 2.4            |
| Qinghu@7            | 1043           | 410            | 31            | 0.39            | 39.928            | 1.51            | 0.04891            | 0.98            | 159.5            | 2.4            |
| Qinghu@6            | 2441           | 1383           | 74            | 0.57            | 39.857            | 1.51            | 0.04967            | 1.57            | 159.7            | 2.4            |
| Qinghu@5            | 2309           | 1351           | 70            | 0.58            | 40.145            | 1.61            | 0.04981            | 1.14            | 158.5            | 2.5            |
| Qinghu@4            | 1733           | 837            | 52            | 0.48            | 39.708            | 1.57            | 0.04909            | 1.37            | 160.4            | 2.5            |
| Qinghu@3            | 1664           | 901            | 51            | 0.54            | 39.943            | 1.51            | 0.04921            | 1.16            | 159.4            | 2.4            |
| <u>Qinghu@2</u>     | 1139           | 673            | 34            | 0.59            | 40.539            | 1.50            | 0.05103            | 1.41            | 156.7            | 2.3            |
| Qinghu@1            | 1643           | 803            | 49            | 0.49            | 40.629            | 1.83            | 0.05004            | 1.23            | 156.6            | 2.8            |
| Qinghu@1            | 1836           | 1083           | 59            | 0.59            | 38.228            | 1.52            | 0.04957            | 0.80            | 166.4            | 2.5            |
| Qinghu@3            | 1743           | 757            | 53            | 0.43            | 39.032            | 1.50            | 0.04990            | 0.74            | 163.0            | 2.4            |
| <del>Qinghu@4</del> | <del>830</del> | <del>352</del> | <del>25</del> | <del>0.42</del> | <del>37.426</del> | <del>1.51</del> | <del>0.08969</del> | <del>1.30</del> | <del>161.3</del> | <del>2.7</del> |
| Qinghu@5            | 1543           | 575            | 45            | 0.37            | 39.566            | 1.50            | 0.04908            | 0.87            | 160.9            | 2.4            |
| Qinghu@6            | 1680           | 798            | 52            | 0.47            | 38.726            | 1.50            | 0.04934            | 1.05            | 164.3            | 2.5            |
| Qinghu@7            | 2310           | 1137           | 72            | 0.49            | 38.521            | 1.50            | 0.04952            | 0.93            | 165.2            | 2.5            |
| Qinghu@8            | 1751           | 770            | 53            | 0.44            | 38.694            | 1.50            | 0.04950            | 0.90            | 164.4            | 2.5            |
| Qinghu@18           | 1238           | 462            | 36            | 0.37            | 40.219            | 1.50            | 0.04907            | 0.86            | 158.4            | 2.4            |
| Qinghu@17           | 1447           | 587            | 42            | 0.41            | 40.534            | 1.50            | 0.04913            | 0.70            | 157.1            | 2.3            |
| Qinghu@16           | 1801           | 772            | 54            | 0.43            | 40.036            | 1.50            | 0.04893            | 0.71            | 159.1            | 2.4            |
| Qinghu@15           | 689            | 279            | 20            | 0.41            | 40.422            | 1.51            | 0.04927            | 1.02            | 157.5            | 2.4            |
| Qinghu@14           | 2473           | 1854           | 92            | 0.75            | 37.660            | 1.51            | 0.04920            | 0.68            | 169.0            | 2.5            |
| Qinghu@13           | 1764           | 613            | 52            | 0.35            | 39.708            | 1.50            | 0.04935            | 0.73            | 160.3            | 2.4            |
| Qinghu@12           | 1414           | 576            | 41            | 0.41            | 40.067            | 1.50            | 0.05003            | 0.75            | 158.8            | 2.4            |
| Qinghu@11           | 1880           | 962            | 57            | 0.51            | 39.965            | 1.50            | 0.04945            | 0.76            | 159.3            | 2.4            |
| <u>Qinghu@10</u>    | 1320           | 500            | 39            | 0.38            | 39.931            | 1.50            | 0.04925            | 0.83            | 159.4            | 2.4            |
| Qinghu@9            | 1500           | 704            | 45            | 0.47            | 40.028            | 1.51            | 0.04994            | 0.75            | 158.9            | 2.4            |
| Qinghu@8            | 1228           | 494            | 36            | 0.40            | 40.134            | 1.50            | 0.04904            | 0.87            | 158.7            | 2.4            |
| Qinghu@7            | 1676           | 826            | 51            | 0.49            | 39.834            | 1.53            | 0.04966            | 0.79            | 159.8            | 2.4            |
| Qinghu@6            | 1206           | 743            | 38            | 0.62            | 39.739            | 1.59            | 0.04996            | 0.97            | 160.1            | 2.5            |
| Qinghu@5            | 1727           | 971            | 54            | 0.56            | 39.211            | 1.51            | 0.04884            | 0.90            | 162.4            | 2.4            |
| Qinghu@4            | 1094           | 590            | 33            | 0.54            | 40.356            | 1.51            | 0.04957            | 1.02            | 157.7            | 2.4            |
| Qinghu@3            | 1068           | 454            | 31            | 0.42            | 40.432            | 1.50            | 0.04973            | 1.32            | 157.4            | 2.3            |
| Qinghu@2            | 1285           | 679            | 40            | 0.53            | 39.316            | 1.50            | 0.04986            | 1.13            | 161.8            | 2.4            |
| Qinghu@1            | 1164           | 548            | 35            | 0.47            | 40.026            | 1.50            | 0.04959            | 1.23            | 159.0            | 2.4            |
| Qinghu@1            | 1139           | 609            | 35            | 0.54            | 39.934            | 1.62            | 0.04966            | 1.03            | 159.4            | 2.6            |
| Qinghu@2            | 2065           | 905            | 62            | 0.44            | 39.775            | 1.55            | 0.04949            | 1.32            | 159.6            | 2.5            |
| Qinghu@3            | 1948           | 908            | 58            | 0.47            | 39.989            | 1.50            | 0.04885            | 1.60            | 158.9            | 2.4            |
| Qinghu@4            | 1790           | 887            | 52            | 0.50            | 40.947            | 1.52            | 0.04991            | 1.18            | 155.0            | 2.3            |



|          |                |                |               |                 |                   |                 |                    |                 |                  |                |
|----------|----------------|----------------|---------------|-----------------|-------------------|-----------------|--------------------|-----------------|------------------|----------------|
| Qinghu@5 | 736            | 398            | 22            | 0.54            | 40.732            | 1.50            | 0.04933            | 1.63            | 155.9            | 2.3            |
| Qinghu@6 | 1831           | 887            | 55            | 0.48            | 39.504            | 1.50            | 0.04991            | 1.04            | 160.6            | 2.4            |
| Qinghu@7 | 2494           | 1238           | 78            | 0.50            | 38.620            | 1.51            | 0.05054            | 0.83            | 164.1            | 2.5            |
| Qinghu@8 | <del>735</del> | <del>332</del> | <del>22</del> | <del>0.45</del> | <del>39.949</del> | <del>1.53</del> | <del>0.05475</del> | <del>1.83</del> | <del>157.8</del> | <del>2.4</del> |
| Qinghu@9 | 1088           | 356            | 31            | 0.33            | 39.969            | 1.52            | 0.04915            | 1.37            | 158.9            | 2.4            |

Note: Qinghu represents external standardization ([Li et al., 2009](#)) during zircon SIMS U-Pb dating

Li, X.H. et al. Precise determination of Phanerozoic zircon Pb/Pb age by multicollector SIMS without external standardization. *Geochem. Geophys. Geosyst.* 10, Q04010, doi: 10.1029/2009GC002400 (2009).

## Magmatic record of India-Asia collision

Di-Cheng Zhu\*, Qing Wang, Zhi-Dan Zhao, Sun-Lin Chung, Peter A. Cawood, Yaoling Niu, Sheng-Ao Liu, Fu-Yuan Wu, and Xuan-Xue Mo

**Table S2 Zircon LA-ICPMS U-Pb age data reported in this study for the Linzizong volcanic rocks in Linzhou Basin**

| Analyses    | CORRECTED RATIOS                  |           |                                  |           |                                  |           |                                   |           | CORRECTED AGES (Ma)              |           |                                   |           |                                  |           |                                  |           |                                   |           |
|-------------|-----------------------------------|-----------|----------------------------------|-----------|----------------------------------|-----------|-----------------------------------|-----------|----------------------------------|-----------|-----------------------------------|-----------|----------------------------------|-----------|----------------------------------|-----------|-----------------------------------|-----------|
|             | $^{207}\text{Pb}/^{206}\text{Pb}$ | $1\sigma$ | $^{207}\text{Pb}/^{235}\text{U}$ | $1\sigma$ | $^{206}\text{Pb}/^{238}\text{U}$ | $1\sigma$ | $^{208}\text{Pb}/^{232}\text{Th}$ | $1\sigma$ | $^{238}\text{U}/^{232}\text{Th}$ | $1\sigma$ | $^{207}\text{Pb}/^{206}\text{Pb}$ | $1\sigma$ | $^{207}\text{Pb}/^{235}\text{U}$ | $1\sigma$ | $^{206}\text{Pb}/^{238}\text{U}$ | $1\sigma$ | $^{208}\text{Pb}/^{232}\text{Th}$ | $1\sigma$ |
| 12LZ06-1-01 | 0.04161                           | 0.00341   | 0.05255                          | 0.00458   | 0.00913                          | 0.00017   | 0.00289                           | 0.00010   | 1.03                             | 0.01      | -198                              | 142       | 52                               | 4         | 59                               | 1         | 58                                | 2         |
| 12LZ06-1-02 | 0.05038                           | 0.00365   | 0.06085                          | 0.00426   | 0.00903                          | 0.00015   | 0.00281                           | 0.00009   | 0.91                             | 0.01      | 213                               | 128       | 60                               | 4         | 58                               | 1         | 57                                | 2         |
| 12LZ06-1-03 | 0.05813                           | 0.00441   | 0.07350                          | 0.00540   | 0.00913                          | 0.00018   | 0.00271                           | 0.00012   | 1.19                             | 0.01      | 535                               | 128       | 72                               | 5         | 59                               | 1         | 55                                | 2         |
| 12LZ06-1-04 | 0.06786                           | 0.00693   | 0.08227                          | 0.00714   | 0.00918                          | 0.00020   | 0.00290                           | 0.00013   | 1.07                             | 0.01      | 864                               | 145       | 80                               | 7         | 59                               | 1         | 58                                | 3         |
| 12LZ06-1-05 | 0.06452                           | 0.00681   | 0.07259                          | 0.00666   | 0.00905                          | 0.00019   | 0.00271                           | 0.00015   | 1.43                             | 0.01      | 759                               | 160       | 71                               | 6         | 58                               | 1         | 55                                | 3         |
| 12LZ06-1-06 | 0.05575                           | 0.00884   | 0.07214                          | 0.01129   | 0.00938                          | 0.00024   | 0.00292                           | 0.00006   | 1.22                             | 0.01      | 442                               | 348       | 71                               | 11        | 60                               | 2         | 59                                | 1         |
| 12LZ06-1-07 | 0.05250                           | 0.00563   | 0.06812                          | 0.00855   | 0.00905                          | 0.00027   | 0.00325                           | 0.00022   | 0.92                             | 0.01      | 307                               | 228       | 67                               | 8         | 58                               | 2         | 66                                | 5         |
| 12LZ06-1-08 | 0.05209                           | 0.00448   | 0.06477                          | 0.00549   | 0.00916                          | 0.00019   | 0.00287                           | 0.00013   | 1.18                             | 0.01      | 289                               | 155       | 64                               | 5         | 59                               | 1         | 58                                | 3         |
| 12LZ06-1-09 | 0.05129                           | 0.00414   | 0.06088                          | 0.00417   | 0.00903                          | 0.00015   | 0.00286                           | 0.00011   | 1.14                             | 0.01      | 254                               | 127       | 60                               | 4         | 58                               | 0.9       | 58                                | 2         |
| 12LZ06-1-10 | 0.06441                           | 0.00580   | 0.07637                          | 0.00681   | 0.00914                          | 0.00024   | 0.00300                           | 0.00020   | 1.8                              | 0.02      | 755                               | 145       | 75                               | 6         | 59                               | 2         | 61                                | 4         |
| 12LZ06-1-11 | 0.04709                           | 0.00336   | 0.05859                          | 0.00410   | 0.00916                          | 0.00015   | 0.00271                           | 0.00011   | 1.25                             | 0.01      | 54                                | 122       | 58                               | 4         | 58.8                             | 1         | 55                                | 2         |
| 12LZ06-1-12 | 0.04732                           | 0.00281   | 0.06028                          | 0.00374   | 0.00912                          | 0.00013   | 0.00278                           | 0.00010   | 1.45                             | 0.01      | 65                                | 109       | 59                               | 4         | 58.5                             | 0.8       | 56                                | 2         |
| 12LZ06-1-13 | 0.05215                           | 0.00389   | 0.06412                          | 0.00451   | 0.00930                          | 0.00017   | 0.00308                           | 0.00012   | 1.18                             | 0.01      | 292                               | 128       | 63                               | 4         | 60                               | 1         | 62                                | 2         |
| 12LZ06-1-14 | 0.04850                           | 0.00173   | 0.32266                          | 0.01139   | 0.04792                          | 0.00052   | 0.01439                           | 0.00044   | 2.97                             | 0.03      | 424                               | 62        | 284                              | 9         | 302                              | 3         | 289                               | 9         |
| 12LZ06-1-15 | 0.04830                           | 0.00323   | 0.05933                          | 0.00383   | 0.00911                          | 0.00016   | 0.00277                           | 0.00010   | 1.04                             | 0.01      | 114                               | 112       | 59                               | 4         | 58                               | 1         | 56                                | 2         |
| 12LZ06-1-16 | 0.06358                           | 0.00547   | 0.07582                          | 0.00586   | 0.00906                          | 0.00017   | 0.00290                           | 0.00012   | 0.99                             | 0.01      | 728                               | 133       | 74                               | 6         | 58                               | 1         | 59                                | 2         |
| 12LZ06-1-17 | 0.06301                           | 0.00442   | 0.07642                          | 0.00525   | 0.00907                          | 0.00017   | 0.00285                           | 0.00013   | 1.09                             | 0.01      | 708                               | 115       | 75                               | 5         | 58                               | 1         | 57                                | 3         |
| 12LZ06-1-18 | 0.05802                           | 0.00767   | 0.07171                          | 0.00936   | 0.00896                          | 0.00018   | 0.00278                           | 0.00004   | 1.62                             | 0.02      | 531                               | 301       | 70                               | 9         | 58                               | 1         | 56.1                              | 0.9       |
| 12LZ23-1-01 | 0.04719                           | 0.00508   | 0.04100                          | 0.00438   | 0.00630                          | 0.00009   | 0.00200                           | 0.00009   | 4.41                             | 0.04      | 59                                | 226       | 41                               | 4         | 40.5                             | 0.5       | 40                                | 2         |
| 12LZ23-1-02 | 0.05175                           | 0.00591   | 0.05455                          | 0.00574   | 0.00772                          | 0.00017   | 0.00199                           | 0.00013   | 1.6                              | 0.02      | 275                               | 196       | 54                               | 6         | 50                               | 1         | 40                                | 3         |
| 12LZ23-1-03 | 0.04463                           | 0.00226   | 0.04750                          | 0.00243   | 0.00768                          | 0.00010   | 0.00242                           | 0.00007   | 1.51                             | 0.02      | -38                               | 82        | 47                               | 2         | 49.3                             | 0.7       | 49                                | 2         |
| 12LZ23-1-04 | 0.04795                           | 0.00303   | 0.05162                          | 0.00329   | 0.00781                          | 0.00011   | 0.00267                           | 0.00010   | 1.91                             | 0.02      | 97                                | 114       | 51                               | 3         | 50.1                             | 0.7       | 54                                | 2         |
| 12LZ23-1-05 | 0.04927                           | 0.00337   | 0.05168                          | 0.00338   | 0.00773                          | 0.00013   | 0.00258                           | 0.00012   | 1.95                             | 0.02      | 161                               | 116       | 51                               | 3         | 49.7                             | 0.8       | 52                                | 2         |
| 12LZ23-1-06 | 0.05853                           | 0.00415   | 0.06194                          | 0.00430   | 0.00775                          | 0.00014   | 0.00241                           | 0.00011   | 1.26                             | 0.01      | 550                               | 122       | 61                               | 4         | 49.7                             | 0.9       | 49                                | 2         |
| 12LZ23-1-07 | 0.04249                           | 0.00297   | 0.04531                          | 0.00319   | 0.00789                          | 0.00016   | 0.00235                           | 0.00011   | 1.68                             | 0.02      | -150                              | 118       | 45                               | 3         | 51                               | 1         | 48                                | 2         |
| 12LZ23-1-08 | 0.04917                           | 0.00283   | 0.05123                          | 0.00270   | 0.00772                          | 0.00011   | 0.00227                           | 0.00008   | 1.18                             | 0.01      | 156                               | 94        | 51                               | 3         | 49.6                             | 0.7       | 46                                | 2         |
| 12LZ23-1-09 | 0.06359                           | 0.00657   | 0.06958                          | 0.00724   | 0.00790                          | 0.00022   | 0.00223                           | 0.00015   | 4.71                             | 0.02      | 728                               | 474       | 68                               | 7         | 54                               | 4         | 45                                | 3         |
| 12LZ23-1-10 | 0.05340                           | 0.00288   | 0.05756                          | 0.00308   | 0.00779                          | 0.00010   | 0.00240                           | 0.00007   | 1.34                             | 0.01      | 346                               | 98        | 57                               | 3         | 50                               | 0.6       | 48                                | 1         |
| 12LZ23-1-11 | 0.05575                           | 0.00388   | 0.05780                          | 0.00392   | 0.00772                          | 0.00014   | 0.00238                           | 0.00010   | 1.26                             | 0.01      | 442                               | 120       | 57                               | 4         | 49.6                             | 0.9       | 48                                | 2         |
| 12LZ23-1-12 | 0.05323                           | 0.00382   | 0.05507                          | 0.00391   | 0.00767                          | 0.00013   | 0.00234                           | 0.00010   | 1.23                             | 0.01      | 339                               | 130       | 54                               | 4         | 49.3                             | 0.9       | 47                                | 2         |
| 12LZ23-1-13 | 0.04400                           | 0.00231   | 0.04667                          | 0.00240   | 0.00776                          | 0.00012   | 0.00223                           | 0.00007   | 1.32                             | 0.01      | -71                               | 81        | 46                               | 2         | 49.8                             | 0.8       | 45                                | 1         |

|                        |                    |                    |                    |                    |                    |                    |                    |                    |                 |                 |                |                |               |              |                 |                |                 |                |
|------------------------|--------------------|--------------------|--------------------|--------------------|--------------------|--------------------|--------------------|--------------------|-----------------|-----------------|----------------|----------------|---------------|--------------|-----------------|----------------|-----------------|----------------|
| 12LZ23-1-14            | 0.04633            | 0.00211            | 0.04972            | 0.00240            | 0.00768            | 0.00011            | 0.00227            | 0.00008            | 1.45            | 0.01            | 15             | 76             | 49            | 2            | 49.3            | 0.7            | 46              | 2              |
| 12LZ23-1-15            | 0.04942            | 0.00222            | 0.05302            | 0.00236            | 0.00777            | 0.00011            | 0.00223            | 0.00006            | 1.05            | 0.01            | 168            | 78             | 52            | 2            | 49.9            | 0.7            | 45              | 1              |
| 12LZ23-1-16            | 0.04168            | 0.00220            | 0.04426            | 0.00240            | 0.00769            | 0.00012            | 0.00208            | 0.00007            | 1.23            | 0.01            | -194           | 95             | 44            | 2            | 49.4            | 0.8            | 42              | 1              |
| 12LZ23-1-17            | 0.04982            | 0.00344            | 0.05170            | 0.00325            | 0.00774            | 0.00013            | 0.00227            | 0.00007            | 1.07            | 0.01            | 187            | 113            | 51            | 3            | 49.7            | 0.8            | 46              | 1              |
| 12LZ23-1-18            | 0.04987            | 0.00292            | 0.05302            | 0.00300            | 0.00775            | 0.00011            | 0.00224            | 0.00007            | 1.03            | 0.01            | 189            | 104            | 52            | 3            | 49.8            | 0.7            | 45              | 1              |
| 13LZ06-1-01            | 0.04654            | 0.00363            | 0.05079            | 0.00387            | 0.00790            | 0.00012            | 0.00265            | 0.00009            | 1.64            | 0.02            | 26             | 140            | 50            | 4            | 50.8            | 0.7            | 54              | 2              |
| 13LZ06-1-02            | 0.05084            | 0.00230            | 0.05432            | 0.00244            | 0.00780            | 0.00009            | 0.00243            | 0.00006            | 0.99            | 0.01            | 234            | 83             | 54            | 2            | 50.1            | 0.6            | 49              | 1              |
| 13LZ06-1-03            | 0.04989            | 0.00344            | 0.05300            | 0.00353            | 0.00785            | 0.00014            | 0.00233            | 0.00009            | 1.32            | 0.01            | 190            | 119            | 52            | 3            | 50.4            | 0.9            | 47              | 2              |
| 13LZ06-1-04            | 0.04688            | 0.00239            | 0.05098            | 0.00271            | 0.00789            | 0.00010            | 0.00247            | 0.00007            | 0.99            | 0.01            | 43             | 92             | 50            | 3            | 50.7            | 0.6            | 50              | 1              |
| <del>13LZ06-1-05</del> | <del>0.04390</del> | <del>0.00398</del> | <del>0.05186</del> | <del>0.00467</del> | <del>0.00869</del> | <del>0.00012</del> | <del>0.00298</del> | <del>0.00009</del> | <del>1.18</del> | <del>0.01</del> | <del>-76</del> | <del>160</del> | <del>51</del> | <del>5</del> | <del>55.8</del> | <del>0.8</del> | <del>60</del>   | <del>2</del>   |
| 13LZ06-1-06            | 0.04805            | 0.00351            | 0.05201            | 0.00375            | 0.00787            | 0.00012            | 0.00264            | 0.00009            | 1.57            | 0.02            | 102            | 131            | 51            | 4            | 50.5            | 0.8            | 53              | 2              |
| 13LZ06-1-07            | 0.04455            | 0.00246            | 0.04848            | 0.00274            | 0.00782            | 0.00011            | 0.00251            | 0.00007            | 1.47            | 0.01            | -42            | 94             | 48            | 3            | 50.2            | 0.7            | 51              | 2              |
| 13LZ06-1-08            | 0.04756            | 0.00316            | 0.05173            | 0.00335            | 0.00791            | 0.00012            | 0.00257            | 0.00009            | 1.37            | 0.01            | 77             | 115            | 51            | 3            | 50.8            | 0.7            | 52              | 2              |
| 13LZ06-1-09            | 0.04728            | 0.00388            | 0.05027            | 0.00405            | 0.00784            | 0.00012            | 0.00239            | 0.00007            | 0.86            | 0.01            | 63             | 148            | 50            | 4            | 50.3            | 0.8            | 48              | 1              |
| 13LZ06-1-10            | 0.04332            | 0.00297            | 0.04663            | 0.00318            | 0.00780            | 0.00010            | 0.00244            | 0.00006            | 0.66            | 0.01            | -106           | 126            | 46            | 3            | 50.1            | 0.6            | 49              | 1              |
| <del>13LZ06-1-11</del> | <del>0.05666</del> | <del>0.00694</del> | <del>0.06053</del> | <del>0.00734</del> | <del>0.00775</del> | <del>0.00016</del> | <del>0.00241</del> | <del>0.00003</del> | <del>1.2</del>  | <del>0.01</del> | <del>478</del> | <del>279</del> | <del>60</del> | <del>7</del> | <del>50</del>   | <del>4</del>   | <del>48.6</del> | <del>0.7</del> |
| 13LZ06-1-12            | 0.04852            | 0.00308            | 0.05205            | 0.00328            | 0.00787            | 0.00012            | 0.00257            | 0.00009            | 1.2             | 0.01            | 125            | 114            | 52            | 3            | 50.6            | 0.8            | 52              | 2              |
| 13LZ06-1-13            | 0.05220            | 0.00448            | 0.05443            | 0.00449            | 0.00786            | 0.00013            | 0.00244            | 0.00009            | 1.16            | 0.01            | 294            | 157            | 54            | 4            | 50.4            | 0.8            | 49              | 2              |
| 13LZ06-1-14            | 0.05118            | 0.00426            | 0.05570            | 0.00463            | 0.00791            | 0.00012            | 0.00242            | 0.00008            | 1.11            | 0.01            | 249            | 161            | 55            | 4            | 50.8            | 0.8            | 49              | 2              |
| 13LZ06-1-15            | 0.04663            | 0.00253            | 0.05141            | 0.00299            | 0.00790            | 0.00013            | 0.00275            | 0.00010            | 1.52            | 0.02            | 30             | 96             | 51            | 3            | 50.7            | 0.8            | 55              | 2              |
| 13LZ06-1-16            | 0.05049            | 0.00359            | 0.05479            | 0.00383            | 0.00783            | 0.00012            | 0.00258            | 0.00009            | 0.98            | 0.01            | 218            | 130            | 54            | 4            | 50.3            | 0.8            | 52              | 2              |
| 13LZ06-1-17            | 0.04805            | 0.00290            | 0.05176            | 0.00315            | 0.00786            | 0.00011            | 0.00256            | 0.00008            | 1.43            | 0.01            | 102            | 109            | 51            | 3            | 50.5            | 0.7            | 52              | 2              |
| 13LZ06-1-18            | 0.04763            | 0.00311            | 0.05081            | 0.00318            | 0.00788            | 0.00011            | 0.00251            | 0.00007            | 0.95            | 0.01            | 81             | 112            | 50            | 3            | 50.6            | 0.7            | 51              | 1              |

## Magmatic record of India-Asia collision

Di-Cheng Zhu\*, Qing Wang, Zhi-Dan Zhao, Sun-Lin Chung, Peter A. Cawood, Yaoling Niu, Sheng-Ao Liu, Fu-Yuan Wu, and Xuan-Xue Mo

**Table S3** Zircon U-Pb age data of the 80-40 Ma intrusive rocks from the Gangdese Batholith (85–95°E) in southern Tibet

| No. | Sample    | Longitude | Latitude | Rock Type       | SiO <sub>2</sub><br>(wt%) | Zircon U-Pb<br>age (Ma) | ± 2σ | References                                                 |
|-----|-----------|-----------|----------|-----------------|---------------------------|-------------------------|------|------------------------------------------------------------|
| 1   | 06FW101   | 91.11     | 29.69    | Monzogranite    | 72.29                     | 64.7                    | 1.1  | Ji et al., 2012, Journal of Asian Earth Sciences 53, 82–95 |
| 2   | 06FW104   | 91.08     | 29.68    | Monzogranite    | 71.71                     | 64.4                    | 0.9  | Ji et al., 2012, Journal of Asian Earth Sciences 53, 82–95 |
| 3   | 06FW105   | 90.93     | 29.68    | Granodiorite    | 67.62                     | 55.2                    | 1.5  | Ji et al., 2012, Journal of Asian Earth Sciences 53, 82–95 |
| 4   | 06FW108   | 90.78     | 29.76    | Diorite         | 62.25                     | 56.8                    | 0.7  | Ji et al., 2012, Journal of Asian Earth Sciences 53, 82–95 |
| 5   | 06FW110   | 90.83     | 29.74    | Monzogranite    | 73.45                     | 54.3                    | 0.9  | Ji et al., 2012, Journal of Asian Earth Sciences 53, 82–95 |
| 6   | 06FW111   | 90.96     | 29.44    | Monzogranite    | 66.49                     | 50.6                    | 0.7  | Ji et al., 2012, Journal of Asian Earth Sciences 53, 82–95 |
| 7   | 06FW112   | 90.96     | 29.49    | Granodiorite    | 60.23                     | 53.4                    | 1.0  | Ji et al., 2012, Journal of Asian Earth Sciences 53, 82–95 |
| 8   | 06FW119   | 90.94     | 29.50    | Granodiorite    | 63.91                     | 51.2                    | 0.7  | Ji et al., 2012, Journal of Asian Earth Sciences 53, 82–95 |
| 9   | 06FW126   | 90.87     | 29.48    | Diorite         | 56.62                     | 55.3                    | 1.0  | Ji et al., 2012, Journal of Asian Earth Sciences 53, 82–95 |
| 10  | 06FW127   | 90.87     | 29.48    | Granitic dike   | 77.16                     | 49.5                    | 0.6  | Ji et al., 2012, Journal of Asian Earth Sciences 53, 82–95 |
| 11  | 06FW129   | 90.90     | 29.46    | Diorite         | 57.43                     | 52.9                    | 0.7  | Ji et al., 2012, Journal of Asian Earth Sciences 53, 82–95 |
| 12  | 06FW131   | 90.91     | 29.41    | Granodiorite    | 69.90                     | 44.0                    | 0.8  | Ji et al., 2012, Journal of Asian Earth Sciences 53, 82–95 |
| 13  | 06FW133   | 90.87     | 29.33    | Monzonite       | 67.45                     | 47.1                    | 1.0  | Ji et al., 2012, Journal of Asian Earth Sciences 53, 82–95 |
| 14  | 06FW134   | 90.88     | 29.36    | Monzogranite    | 70.57                     | 41.9                    | 0.6  | Ji et al., 2012, Journal of Asian Earth Sciences 53, 82–95 |
| 15  | 06FW139   | 90.72     | 29.38    | Diorite         | 61.01                     | 41.5                    | 0.7  | Ji et al., 2012, Journal of Asian Earth Sciences 53, 82–95 |
| 16  | 06FW140   | 90.72     | 29.47    | Monzogranite    | 70.99                     | 43.7                    | 0.9  | Ji et al., 2012, Journal of Asian Earth Sciences 53, 82–95 |
| 17  | 06FW146   | 90.72     | 29.40    | Gabbro          | 52.88                     | 56.9                    | 1.4  | Ji et al., 2012, Journal of Asian Earth Sciences 53, 82–95 |
| 18  | 06FW148   | 90.72     | 29.37    | Monzogranite    | 71.69                     | 51.3                    | 0.6  | Ji et al., 2012, Journal of Asian Earth Sciences 53, 82–95 |
| 19  | 06FW151   | 90.72     | 29.36    | Diorite         | 56.09                     | 55.5                    | 1.2  | Ji et al., 2012, Journal of Asian Earth Sciences 53, 82–95 |
| 20  | 06FW152-2 | 90.18     | 29.40    | Diorite         | 53.49                     | 57.3                    | 0.9  | Ji et al., 2012, Journal of Asian Earth Sciences 53, 82–95 |
| 21  | 06FW154   | 90.27     | 29.58    | Monzogranite    | 75.43                     | 51.3                    | 0.7  | Ji et al., 2012, Journal of Asian Earth Sciences 53, 82–95 |
| 22  | 06FW155   | 90.18     | 29.54    | Bi-monzogranite | 70.33                     | 61.1                    | 1.2  | Ji et al., 2012, Journal of Asian Earth Sciences 53, 82–95 |
| 23  | 06FW156   | 90.27     | 29.50    | Granodiorite    | 67.99                     | 55.4                    | 0.8  | Ji et al., 2012, Journal of Asian Earth Sciences 53, 82–95 |
| 24  | 06FW162   | 89.62     | 29.54    | Diorite         | 60.29                     | 50.9                    | 0.8  | Ji et al., 2012, Journal of Asian Earth Sciences 53, 82–95 |
| 25  | 06FW174   | 90.10     | 29.35    | Diorite         | 56.45                     | 50.2                    | 1.5  | Ji et al., 2012, Journal of Asian Earth Sciences 53, 82–95 |
| 26  | 06FW175   | 90.07     | 29.35    | Diorite         | 57.57                     | 52.6                    | 1.2  | Ji et al., 2012, Journal of Asian Earth Sciences 53, 82–95 |

|    |          |       |       |                       |       |      |     |                                                                             |
|----|----------|-------|-------|-----------------------|-------|------|-----|-----------------------------------------------------------------------------|
| 27 | 06FW176  | 90.25 | 29.33 | Diorite               | 54.48 | 53.6 | 1.0 | Ji et al., 2012, Journal of Asian Earth Sciences 53, 82–95                  |
| 28 | 08CQ02   | 85.74 | 29.63 | Monzogranite          | 78.07 | 43.9 | 0.3 | Zhu et al., 2011, Earth and Planetary Science Letters 301, 241–255          |
| 29 | 08CQ03   | 85.76 | 29.78 | Monzogranite          | 67.92 | 51.9 | 0.4 | Zhu et al., 2011, Earth and Planetary Science Letters 301, 241–255          |
| 30 | 08CQ09   | 85.74 | 29.90 | Monzogranite          | 68.52 | 50.0 | 0.4 | Zhu et al., 2011, Earth and Planetary Science Letters 301, 241–255          |
| 31 | 08DX01   | 90.57 | 30.01 | Diorite               | 55.57 | 69.8 | 0.7 | Zhu et al., unpublished data                                                |
| 32 | 08FW50   | 91.18 | 29.64 | Granodiorite          | 68.13 | 67.1 | 4.1 | Ji, W.Q., 2010, Ph.D thesis, p. 1–146                                       |
| 33 | 08FW54   | 91.99 | 29.73 | Diorite               | 54.83 | 65.6 | 1.4 | Ji, W.Q., 2010, Ph.D thesis, p. 1–146                                       |
| 34 | 08FW56   | 92.20 | 29.71 | Monzogranite          | 65.58 | 70.5 | 2.1 | Ji, W.Q., 2010, Ph.D thesis, p. 1–146                                       |
| 35 | 08FW60   | 93.78 | 29.81 | Monzogranite          | 77.24 | 47.6 | 2.5 | Ji, W.Q., 2010, Ph.D thesis, p. 1–146                                       |
| 36 | 08FW61   | 94.01 | 29.76 | Bi granite            | 75.98 | 53.8 | 1.4 | Ji, W.Q., 2010, Ph.D thesis, p. 1–146                                       |
| 37 | 08FW62   | 94.29 | 29.74 | Granodiorite          | 74.05 | 72.7 | 3.8 | Ji, W.Q., 2010, Ph.D thesis, p. 1–146                                       |
| 38 | 08FW63   | 94.19 | 29.75 | Granodiorite          | 73.05 | 53.0 | 3.8 | Ji, W.Q., 2010, Ph.D thesis, p. 1–146                                       |
| 39 | 08FW66   | 92.04 | 29.72 | Syenogranite          | 76.03 | 70.1 | 2.7 | Ji, W.Q., 2010, Ph.D thesis, p. 1–146                                       |
| 40 | 09FW10   | 93.31 | 29.62 | Gneissic granodiorite | 65.52 | 66.2 | 1.1 | Ji, W.Q., 2010, Ph.D thesis, p. 1–146                                       |
| 41 | 09FW30   | 93.20 | 29.15 | Two mica monzogranite | 72.25 | 76.7 | 1.6 | Ji, W.Q., 2010, Ph.D thesis, p. 1–146                                       |
| 42 | 09FW33   | 93.18 | 29.12 | Two mica monzogranite | 79.70 | 79.7 | 1.3 | Ji, W.Q., 2010, Ph.D thesis, p. 1–146                                       |
| 43 | 09FW41   | 92.74 | 29.42 | Monzogranite          | 70.44 | 56.1 | 1.1 | Ji, W.Q., 2010, Ph.D thesis, p. 1–146                                       |
| 44 | 09FW42   | 92.75 | 29.41 | Granitic gneiss       | 69.74 | 50.7 | 1.1 | Ji, W.Q., 2010, Ph.D thesis, p. 1–146                                       |
| 45 | 09FW43   | 92.75 | 29.41 | Monzogranite          | 70.66 | 42.0 | 0.7 | Ji, W.Q., 2010, Ph.D thesis, p. 1–146                                       |
| 46 | 09FW50   | 92.70 | 29.24 | Monzogranite          | 67.85 | 50.2 | 0.9 | Ji, W.Q., 2010, Ph.D thesis, p. 1–146                                       |
| 47 | 10CK-02  | 86.14 | 30.37 | Granodiorite          | 68.00 | 65.2 | 0.5 | Wang et al., 2012, Acta Petrologica Sinica, 28(5), 1647–1662                |
| 48 | 11LS01-1 | 90.94 | 29.50 | Gabbro                | 50.13 | 47.3 | 0.4 | Zhu et al., unpublished data                                                |
| 49 | 11LS06-1 | 90.71 | 29.36 | Gabbro                | 54.35 | 46.2 | 1.5 | Zhu et al., unpublished data                                                |
| 50 | 12AM04-2 | 86.32 | 29.63 | Gabbro                | 52.03 | 44.8 | 0.2 | Zhu et al., unpublished data                                                |
| 51 | 12AM06-2 | 86.32 | 29.58 | Monzogranite          | 73.02 | 51.2 | 0.6 | Zhu et al., unpublished data                                                |
| 52 | 12CZ15-1 | 86.75 | 29.75 | Granodiorite          | 79.14 | 60.8 | 0.6 | Zhu et al., unpublished data                                                |
| 53 | 12DJ08-1 | 87.79 | 29.44 | Gabbro                | 66.09 | 51.8 | 0.5 | Zhu et al., unpublished data                                                |
| 54 | 12DJ12-1 | 87.87 | 29.43 | Monzogranite          | 66.72 | 44.3 | 0.4 | Zhu et al., unpublished data                                                |
| 55 | 12LY00-1 | 89.24 | 29.72 | Granodiorite          | 77.02 | 51.0 | 0.5 | Zhu et al., unpublished data                                                |
| 56 | 12PC30-1 | 87.99 | 29.36 | Granodiorite          |       | 52.3 | 0.6 | Zhu et al., unpublished data                                                |
| 57 | 13WBD    | 89.55 | 29.29 | Diabase dyke          |       | 49.8 | 1.3 | Wang et al., 2013, Personal communication                                   |
| 58 | D093TW   | 92.72 | 29.63 | Granodiorite          | 68.90 | 70.4 | 2.2 | Chen et al., 2010, Journal of Mineral and Petrology 30(1), 83–92            |
| 59 | ET021D   | 91.63 | 29.69 | Monzogranite          | 71.60 | 64.6 | 2.5 | Wen, D.R., 2007, Ph.D thesis, National Taiwan University, p. 1–120          |
| 60 | GR-20    | 93.42 | 29.08 | Granite               |       | 68.0 | 4.0 | Quidelleur et al., 1997, Journal of Geophysical Research 102(B2), 2659–2679 |

|    |         |       |       |                       |       |      |     |                                                                           |
|----|---------|-------|-------|-----------------------|-------|------|-----|---------------------------------------------------------------------------|
| 61 | LS2     | 91.00 | 29.89 | Granite               | 69.59 | 51.0 | 1.2 | Huang et al., 2010, <i>Acta Petrologica Sinica</i> 26, 10, 3131–3142      |
| 62 | LS5     | 91.24 | 29.69 | Diorite               | 56.09 | 61.0 | 2.9 | Huang et al., 2010, <i>Acta Petrologica Sinica</i> 26, 10, 3131–3142      |
| 63 | LZ09-2  | 94.47 | 29.55 | Granite               | 75.22 | 51.4 | 1.4 | Ji, W.Q., 2010, Ph.D thesis, p. 1–146                                     |
| 64 | LZ11-1  | 94.46 | 29.46 | Granodiorite          | 73.11 | 44.3 | 0.8 | Ji, W.Q., 2010, Ph.D thesis, p. 1–146                                     |
| 65 | LZ15-5  | 94.35 | 29.63 | Dioritic enclave      | 55.22 | 64.0 | 1.2 | Ji, W.Q., 2010, Ph.D thesis, p. 1–146                                     |
| 66 | LZ16-2  | 94.37 | 29.60 | Granodiorite          | 61.56 | 67.4 | 1.4 | Ji, W.Q., 2010, Ph.D thesis, p. 1–146                                     |
| 67 | LZ17-1  | 94.43 | 29.46 | Two-mica monzogranite | 73.23 | 51.7 | 1.0 | Ji, W.Q., 2010, Ph.D thesis, p. 1–146                                     |
| 68 | ML06-1  | 93.37 | 29.05 | Granodiorite          | 70.58 | 79.3 | 0.4 | Zhu et al., 2011, <i>Earth and Planetary Science Letters</i> 301, 241–255 |
| 69 | ML07-1  | 93.52 | 29.17 | Granodiorite          | 69.88 | 73.5 | 1.2 | Ji, W.Q., 2010, Ph.D thesis, p. 1–146                                     |
| 70 | ML08-1  | 93.47 | 29.15 | Bt monzogranite       | 74.08 | 73.0 | 1.7 | Ji, W.Q., 2010, Ph.D thesis, p. 1–146                                     |
| 71 | ML09-1  | 93.38 | 29.06 | Bt monzogranite       | 72.48 | 78.0 | 1.3 | Ji, W.Q., 2010, Ph.D thesis, p. 1–146                                     |
| 72 | ML11-1  | 93.12 | 29.11 | Two-mica monzogranite | 72.15 | 75.0 | 1.3 | Ji, W.Q., 2010, Ph.D thesis, p. 1–146                                     |
| 73 | ML18-4  | 93.68 | 29.15 | Diorite               | 54.80 | 38.5 | 0.3 | Guan et al., 2012, <i>Gondwana Research</i> 21, 88–99                     |
| 74 | ML19-1  | 93.75 | 29.13 | Granodiorite          | 70.68 | 78.1 | 0.6 | Guan et al., 2010, <i>Acta Petrologica Sinica</i> 26, 2165–2179           |
| 75 | ML25-1  | 94.43 | 29.46 | Syenogranite          | 76.11 | 56.7 | 1.0 | Zhu et al., unpublished data                                              |
| 76 | ML26-1  | 94.35 | 29.63 | Granodiorite          | 66.17 | 64.8 | 0.5 | Zhu et al., unpublished data                                              |
| 77 | ML28-1  | 94.24 | 29.76 | Bi monzogranite       | 70.23 | 53.4 | 0.4 | Zhu et al., unpublished data                                              |
| 78 | ML30-1  | 93.78 | 29.81 | Granite               | 76.60 | 42.0 | 0.4 | Zhu et al., unpublished data                                              |
| 79 | ML37-1  | 93.30 | 29.60 | Bi monzogranite       | 70.96 | 70.1 | 0.4 | Zhu et al., unpublished data                                              |
| 80 | ML38-2  | 93.30 | 29.60 | Gabbroic enclave      | 48.23 | 69.5 | 0.7 | Zhu et al., unpublished data                                              |
| 81 | NB-159  | 94.70 | 29.75 | Diorite               | 58.61 | 66.0 | 1.9 | Booth et al., 2004, <i>American Journal of Science</i> 304, 889–929       |
| 82 | NM01    | 89.08 | 29.54 | Diorite               | 60.53 | 44.3 | 1.1 | Cong et al., 2012, <i>Journal of Jilin University</i> 42 (6), 1783–1795   |
| 83 | NM02    | 89.10 | 29.49 | Granodiorite          | 65.28 | 45.5 | 1.1 | Cong et al., 2012, <i>Journal of Jilin University</i> 42 (6), 1783–1795   |
| 84 | NML03-1 | 89.06 | 29.62 | Diorite               | 58.03 | 62.4 | 0.3 | Zhu et al., 2011, <i>Earth and Planetary Science Letters</i> 301, 241–255 |
| 85 | PD2-12  | 92.24 | 29.62 | Syenogranite          | 77.26 | 66.6 | 0.7 | Liu et al., 2012, <i>Mineral Deposits</i> 31, 4, 727–744                  |
| 86 | RB12    | 89.69 | 29.36 | Diorite               | 54.73 | 45.0 | 1.6 | Huang et al., 2010, <i>Acta Petrologica Sinica</i> 26, 10, 3131–3142      |
| 87 | SR01-1  | 92.10 | 29.29 | Granodiorite          | 62.52 | 45.4 | 0.7 | Ji et al., 2012, <i>Journal of Asian Earth Sciences</i> 53, 82–95         |
| 88 | SR02-1  | 92.12 | 29.29 | Granite               | 72.05 | 37.7 | 0.7 | Ji et al., 2012, <i>Journal of Asian Earth Sciences</i> 53, 82–95         |
| 89 | SR03-1  | 92.22 | 29.27 | Granodiorite          | 71.48 | 59.8 | 0.9 | Ji et al., 2012, <i>Journal of Asian Earth Sciences</i> 53, 82–95         |
| 90 | SR04-1  | 92.24 | 29.32 | Granodiorite          | 61.81 | 42.1 | 0.7 | Ji et al., 2012, <i>Journal of Asian Earth Sciences</i> 53, 82–95         |
| 91 | ST043A  | 88.23 | 29.45 | Granodiorite          | 63.60 | 50.4 | 1.2 | Wen et al., 2008, <i>Chemical Geology</i> 252, 191–201                    |
| 92 | ST104A  | 91.81 | 29.27 | Granodiorite          | 65.58 | 60.1 | 1.4 | Chu et al., 2006, <i>Geology</i> 34, 745–748                              |
| 93 | ST147A  | 90.18 | 29.40 | Diorite               | 53.87 | 50.6 | 0.7 | Wen et al., 2008, <i>Chemical Geology</i> 252, 191–201                    |
| 94 | ST152A  | 90.69 | 29.33 | Gabbro                | 49.75 | 52.7 | 1.4 | Wen et al., 2008, <i>Chemical Geology</i> 252, 191–201                    |

|     |           |       |       |                           |       |     |                                                                                |
|-----|-----------|-------|-------|---------------------------|-------|-----|--------------------------------------------------------------------------------|
| 95  | SWYT-1    | 91.69 | 29.87 | Monzogranite              | 61.0  | 1.9 | Luo et al., 2011, Mineral Deposits 30(2), 266–278                              |
| 96  | T024      | 93.75 | 29.14 | Tonalite                  | 69.53 | 1.1 | Wen, D.R., 2007, Ph.D thesis, National Taiwan University, p. 1–120             |
| 97  | T044E     | 89.08 | 29.49 | Gabbro                    | 52.10 | 1.2 | Wen et al., 2008, Chemical Geology 252, 191–201                                |
| 98  | T076      | 91.22 | 29.67 | Granodiorite              | 69.90 | 1.6 | Wen et al., 2008, Chemical Geology 252, 191–201                                |
| 99  | T10-123-2 | 94.41 | 29.61 | Two-mica granite          | 75.57 | 0.4 | Zhang et al., 2013, Journal of Petrology 54, 12, 2547–2580                     |
| 100 | T10-74-2  | 94.71 | 29.64 | Grt-Bt-Amp gneiss         | 55.24 | 1.2 | Zhang et al., 2013, Journal of Petrology 54, 12, 2547–2580                     |
| 101 | T10-94-10 | 93.89 | 29.21 | Gabbro                    | 51.75 | 2.5 | Zhang et al., 2014, Geochimica et Cosmochimica Acta, In press                  |
| 102 | T10-95-2  | 93.91 | 29.19 | Pegimatite                |       | 1.2 | Zhang et al., 2014, Geochimica et Cosmochimica Acta, In press                  |
| 103 | T308      | 90.93 | 29.48 | Monzogranite              | 64.95 | 0.5 | Xu, W.C., 2010. Ph.D thesis, China University of Geosciences (Wuhan), p. 1–172 |
| 104 | T315      | 90.87 | 29.38 | Granodiorite              | 59.77 | 0.5 | Xu, W.C., 2010. Ph.D thesis, China University of Geosciences (Wuhan), p. 1–172 |
| 105 | T316      | 90.87 | 29.38 | Qtz diorite               | 61.49 | 0.7 | Xu, W.C., 2010. Ph.D thesis, China University of Geosciences (Wuhan), p. 1–172 |
| 106 | T364      | 90.27 | 29.51 | Monzogranite              | 69.97 | 0.7 | Xu, W.C., 2010. Ph.D thesis, China University of Geosciences (Wuhan), p. 1–172 |
| 107 | T377      | 90.06 | 29.51 | Granodiorite              | 66.43 | 1.3 | Xu, W.C., 2010. Ph.D thesis, China University of Geosciences (Wuhan), p. 1–172 |
| 108 | T390      | 90.12 | 29.35 | Qtz diorite               | 61.02 | 0.8 | Xu, W.C., 2010. Ph.D thesis, China University of Geosciences (Wuhan), p. 1–172 |
| 109 | T392      | 88.37 | 29.95 | Monzogranite              | 70.66 | 1.1 | Xu, W.C., 2010. Ph.D thesis, China University of Geosciences (Wuhan), p. 1–172 |
| 110 | T405      | 88.32 | 29.56 | Monzogranite              | 68.88 | 1.0 | Xu, W.C., 2010. Ph.D thesis, China University of Geosciences (Wuhan), p. 1–172 |
| 111 | T420      | 87.45 | 29.38 | Granodiorite              | 63.24 | 0.6 | Xu, W.C., 2010. Ph.D thesis, China University of Geosciences (Wuhan), p. 1–172 |
| 112 | T426      | 86.21 | 29.6  | Monzogranite              | 67.72 | 0.8 | Xu, W.C., 2010. Ph.D thesis, China University of Geosciences (Wuhan), p. 1–172 |
| 113 | T439      | 89.10 | 29.46 | Granodiorite              | 65.92 | 1.0 | Xu, W.C., 2010. Ph.D thesis, China University of Geosciences (Wuhan), p. 1–172 |
| 114 | T445      | 89.06 | 29.62 | Monzogranite              | 74.36 | 0.5 | Xu, W.C., 2010. Ph.D thesis, China University of Geosciences (Wuhan), p. 1–172 |
| 115 | T446      | 89.06 | 29.63 | Granodiorite              | 64.67 | 1.1 | Xu, W.C., 2010. Ph.D thesis, China University of Geosciences (Wuhan), p. 1–172 |
| 116 | T478      | 90.93 | 29.67 | Monzogranite              | 67.58 | 0.8 | Xu, W.C., 2010. Ph.D thesis, China University of Geosciences (Wuhan), p. 1–172 |
| 117 | T479      | 90.60 | 30.04 | Two-mica granite          | 71.22 | 0.6 | Xu, W.C., 2010. Ph.D thesis, China University of Geosciences (Wuhan), p. 1–172 |
| 118 | T490      | 91.98 | 29.73 | Monzogranite              | 71.45 | 1.2 | Xu, W.C., 2010. Ph.D thesis, China University of Geosciences (Wuhan), p. 1–172 |
| 119 | T497      | 92.15 | 29.71 | Granodiorite              | 64.12 | 1.2 | Xu, W.C., 2010. Ph.D thesis, China University of Geosciences (Wuhan), p. 1–172 |
| 120 | T529      | 94.43 | 29.45 | Granitic gneiss           | 73.93 | 0.4 | Xu, W.C., 2010. Ph.D thesis, China University of Geosciences (Wuhan), p. 1–172 |
| 121 | T556      | 92.20 | 29.30 | Monzogranite              | 69.71 | 0.6 | Xu, W.C., 2010. Ph.D thesis, China University of Geosciences (Wuhan), p. 1–172 |
| 122 | T560      | 93.18 | 29.26 | Granite                   | 70.00 | 0.9 | Xu, W.C., 2010. Ph.D thesis, China University of Geosciences (Wuhan), p. 1–172 |
| 123 | T670      | 94.44 | 29.55 | Granitic gneiss           | 71.72 | 0.7 | Guo et al., 2011, Lithos 127, 54–67                                            |
| 124 | T8-15-2   | 94.01 | 29.30 | Granodiorite              | 70.46 | 0.6 | Zhang et al., 2013, Journal of Petrology 54, 12, 2547–2580                     |
| 125 | T9-33-5   | 94.44 | 29.55 | Ep granodiorite           | 68.42 | 1.3 | Zhang et al., 2013, Journal of Petrology 54, 12, 2547–2580                     |
| 126 | T9-33-7   | 94.44 | 29.55 | Grt two-mica granodiorite | 69.31 | 0.8 | Zhang et al., 2013, Journal of Petrology 54, 12, 2547–2580                     |
| 127 | T9-62-1   | 94.45 | 29.43 | Grt-Bt gneiss             | 64.27 | 1.8 | Zhang et al., 2013, Journal of Petrology 54, 12, 2547–2580                     |

## Magmatic record of India-Asia collision

Di-Cheng Zhu\*, Qing Wang, Zhi-Dan Zhao, Sun-Lin Chung, Peter A. Cawood, Yaoling Niu, Sheng-Ao Liu, Fu-Yuan Wu, and Xuan-Xue Mo

**Table S4** Geochemical data of the Linzizong volcanic rocks in Linzhou Basin\*

| Sample   | Rock type         | Latitude | Longitude | Strata    | Age | [SiO <sub>2</sub> ] | [TiO <sub>2</sub> ] | [Al <sub>2</sub> O <sub>3</sub> ] | [Fe <sub>2</sub> O <sub>3</sub> ] | [MnO] | [MgO] | [CaO] | [Na <sub>2</sub> O] | [K <sub>2</sub> O] | [P <sub>2</sub> O <sub>5</sub> ] | LOI  | Zr/Y | Zr (ppm) | Zircon saturation temperature (°C) | References                        |
|----------|-------------------|----------|-----------|-----------|-----|---------------------|---------------------|-----------------------------------|-----------------------------------|-------|-------|-------|---------------------|--------------------|----------------------------------|------|------|----------|------------------------------------|-----------------------------------|
| 12LZ02-1 | Andesite          | 29.95    | 91.20     | Dianzhong | E1d | 60.2                | 63.15               | 0.69                              | 16.89                             | 5.79  | 0.11  | 2.16  | 5.51                | 2.97               | 2.54                             | 0.19 | 4.26 | 122      | 739                                | This study                        |
| 12LZ03-1 | Andesite          | 29.95    | 91.20     | Dianzhong | E1d | 60.2                | 63.45               | 0.67                              | 16.67                             | 5.56  | 0.12  | 2.09  | 5.69                | 3.16               | 2.40                             | 0.19 | 3.87 | 122      | 734                                | This study                        |
| 12LZ04-1 | Andesite          | 29.95    | 91.20     | Dianzhong | E1d | 60.2                | 64.12               | 0.66                              | 16.81                             | 5.22  | 0.13  | 1.57  | 5.44                | 3.28               | 2.60                             | 0.19 | 4.30 | 123      | 738                                | This study                        |
| 12LZ06-1 | Dacite            | 29.95    | 91.20     | Dianzhong | E1d | 58.5                | 66.01               | 0.69                              | 16.46                             | 5.85  | 0.06  | 1.77  | 4.62                | 2.95               | 1.42                             | 0.19 | 2.59 | 103      | 747                                | This study                        |
| 12LZ07-1 | Andesite          | 29.95    | 91.20     | Dianzhong | E1d | 58.5                | 63.23               | 0.69                              | 17.00                             | 5.68  | 0.10  | 1.98  | 5.16                | 3.38               | 2.59                             | 0.19 | 2.58 | 126      | 741                                | This study                        |
| 12LZ08-1 | Andesite          | 29.95    | 91.20     | Dianzhong | E1d | 58.5                | 60.21               | 0.82                              | 17.51                             | 7.14  | 0.10  | 1.93  | 6.35                | 3.32               | 2.41                             | 0.22 | 4.73 | 133      | 731                                | This study                        |
| 12LZ09-1 | Andesite          | 29.95    | 91.20     | Dianzhong | E1d | 58.5                | 59.86               | 0.82                              | 17.52                             | 7.36  | 0.12  | 2.71  | 6.14                | 3.09               | 2.17                             | 0.22 | 3.92 | 135      | 739                                | This study                        |
| 12LZ10-1 | Andesite          | 29.96    | 91.21     | Dianzhong | E1d | 58.5                | 60.58               | 0.80                              | 17.41                             | 7.17  | 0.15  | 2.77  | 5.40                | 3.35               | 2.13                             | 0.22 | 3.38 | 138      | 747                                | This study                        |
| 12LZ11-1 | Andesite          | 29.96    | 91.21     | Dianzhong | E1d | 58.5                | 63.52               | 0.71                              | 17.11                             | 6.01  | 0.14  | 2.03  | 5.02                | 3.75               | 1.52                             | 0.19 | 6.82 | 119      | 743                                | This study                        |
| 12LZ12-1 | Andesite          | 29.97    | 91.18     | Dianzhong | E1d | 58.5                | 57.41               | 0.90                              | 18.45                             | 8.39  | 0.12  | 1.64  | 6.26                | 3.33               | 3.26                             | 0.24 | 6.30 | 105      | 709                                | This study                        |
| 13LZ01-1 | Andesite          | 29.95    | 91.20     | Dianzhong | E1d | 60.2                | 60.21               | 0.75                              | 17.99                             | 5.64  | 0.22  | 2.55  | 5.52                | 6.10               | 0.81                             | 0.20 | 6.00 | 126      | 718                                | This study                        |
| 13LZ02-1 | Andesite          | 29.95    | 91.21     | Dianzhong | E1d | 60.2                | 56.78               | 0.87                              | 19.42                             | 7.14  | 0.27  | 2.55  | 8.50                | 3.06               | 1.13                             | 0.27 | 4.66 | 122      | 717                                | This study                        |
| 13LZ08-1 | Andesite          | 29.98    | 91.19     | Dianzhong | E1d | 58.3                | 54.41               | 1.02                              | 19.38                             | 9.28  | 0.17  | 3.73  | 6.10                | 5.34               | 0.35                             | 0.23 | 7.06 |          |                                    | This study                        |
| D-2      | Andesite          | 29.95    | 91.13     | Dianzhong | E1d | 58.5                | 60.02               | 0.71                              | 16.25                             | 8.64  | 0.15  | 3.71  | 3.72                | 4.17               | 2.42                             | 0.19 | 3.62 | 136      | 746                                | Mo et al., 2008, Chemical Geology |
| D-15     | Andesite          | 29.96    | 91.19     | Dianzhong | E1d | 58.5                | 59.04               | 0.69                              | 16.19                             | 9.89  | 0.15  | 2.57  | 6.60                | 2.78               | 1.91                             | 0.17 | 4.22 | 118      | 717                                | Mo et al., 2008, Chemical Geology |
| BD-145   | Andesite          | 29.95    | 91.20     | Dianzhong | E1d | 58.5                | 62.32               | 0.63                              | 16.07                             | 7.78  | 0.11  | 1.79  | 5.69                | 3.07               | 2.38                             | 0.17 | 3.48 | 129      | 734                                | Mo et al., 2008, Chemical Geology |
| BD-151   | Andesite          | 29.97    | 91.21     | Dianzhong | E1d | 58.5                | 58.38               | 0.65                              | 18.33                             | 8.49  | 0.11  | 1.94  | 8.05                | 2.65               | 1.22                             | 0.18 | 4.56 | 156      | 742                                | Mo et al., 2008, Chemical Geology |
| BD-160   | Andesite          | 29.96    | 91.18     | Dianzhong | E1d | 58.5                | 60.20               | 0.73                              | 17.53                             | 7.88  | 0.10  | 1.81  | 3.21                | 5.77               | 2.55                             | 0.23 | 3.07 | 134      | 740                                | Mo et al., 2008, Chemical Geology |
| T240B    | Andesite          | 29.91    | 91.07     | Dianzhong | E1d | 60.2                | 61.07               | 0.86                              | 17.89                             | 6.43  | 0.11  | 2.54  | 5.69                | 1.77               | 3.45                             | 0.20 | 1.93 | 199      | 788                                | Lee et al., 2012, JAES            |
| T239     | Andesite          | 29.91    | 91.08     | Dianzhong | E1d | 60.2                | 59.49               | 0.94                              | 18.35                             | 6.81  | 0.10  | 2.97  | 7.15                | 2.44               | 1.55                             | 0.20 | 3.16 | 188      | 771                                | Lee et al., 2012, JAES            |
| T238B    | Andesite          | 29.96    | 91.15     | Dianzhong | E1d | 60.2                | 55.77               | 0.95                              | 19.02                             | 8.54  | 0.11  | 3.36  | 8.95                | 2.82               | 0.26                             | 0.22 | 5.07 | 161      | 737                                | Lee et al., 2012, JAES            |
| T233B    | Andesite          | 29.95    | 91.20     | Dianzhong | E1d | 60.2                | 61.41               | 0.77                              | 17.55                             | 6.39  | 0.14  | 2.54  | 4.17                | 4.38               | 2.47                             | 0.18 | 2.50 | 126      | 742                                | Lee et al., 2012, JAES            |
| BD-55    | Rhyolitic tuff    | 29.98    | 91.17     | Nianbo    | E2n | 54.5                | 76.32               | 0.12                              | 12.15                             | 1.91  | 0.09  | 0.44  | 2.42                | 2.49               | 4.02                             | 0.03 | 3.09 | 114      | 753                                | Mo et al., 2008, Chemical Geology |
| BD-65    | Basalt            | 29.98    | 91.17     | Nianbo    | E2n | 52.7                | 51.11               | 0.95                              | 17.57                             | 11.86 | 0.17  | 3.36  | 8.92                | 2.94               | 2.67                             | 0.45 | 5.03 | 3.8      |                                    | Mo et al., 2008, Chemical Geology |
| BD-77    | Rhyolitic tuff    | 29.98    | 91.14     | Nianbo    | E2n | 52.6                | 70.22               | 0.25                              | 18.42                             | 0.90  | 0.01  | 0.27  | 0.29                | 4.22               | 5.35                             | 0.06 | 1.68 | 234      | 843                                | Mo et al., 2008, Chemical Geology |
| LZ991    | Rhyolitic tuff    | 29.97    | 91.13     | Nianbo    | E2n | 55.4                | 76.16               | 0.13                              | 14.72                             | 2.18  | 0.02  | 1.08  | 0.98                | 0.57               | 4.12                             | 0.03 | 3.54 | 113      | 811                                | Mo et al., 2008, Chemical Geology |
| LZ9921   | Rhyolitic tuff    | 29.98    | 91.19     | Nianbo    | E2n | 54.9                | 77.32               | 0.13                              | 12.45                             | 2.20  | 0.03  | 0.47  | 2.36                | 2.39               | 2.61                             | 0.03 | 3.68 | 95.6     | 757                                | Mo et al., 2008, Chemical Geology |
| L060     | Rhyolitic tuff    | 29.98    | 91.19     | Nianbo    | E2n | 54.9                | 79.44               | 0.12                              | 11.68                             | 1.53  | 0.04  | 0.21  | 1.64                | 3.54               | 1.76                             | 0.03 | 2.12 | 112      | 769                                | Mo et al., 2008, Chemical Geology |
| 12LZ27-1 | Rhyolitic tuff    | 29.98    | 91.15     | Nianbo    | E2n | 52.6                | 73.31               | 0.63                              | 17.92                             | 1.70  | 0.01  | 0.48  | 0.22                | 0.59               | 5.02                             | 0.12 | 3.34 | 380      | 946                                | This study                        |
| 12LZ28-1 | Basalt            | 29.97    | 91.15     | Nianbo    | E2n | 52.9                | 50.77               | 0.98                              | 18.95                             | 9.23  | 0.20  | 3.27  | 7.36                | 4.17               | 4.56                             | 0.50 | 6.36 | 5.5      |                                    | This study                        |
| 12LZ29-1 | Rhyolite          | 29.97    | 91.15     | Nianbo    | E2n | 55.4                | 76.05               | 0.37                              | 13.71                             | 1.40  | 0.03  | 0.90  | 0.65                | 5.35               | 1.44                             | 0.09 | 2.16 | 165      | 804                                | This study                        |
| 13LZ10-1 | Basalt            | 29.98    | 91.19     | Nianbo    | E2n | 54.5                | 48.16               | 1.14                              | 17.35                             | 10.55 | 0.54  | 5.16  | 10.31               | 3.62               | 2.79                             | 0.38 | 8.17 | 3.7      |                                    | This study                        |
| 13LZ11-1 | Basalt            | 29.98    | 91.19     | Nianbo    | E2n | 54.5                | 51.85               | 1.09                              | 18.24                             | 10.31 | 0.13  | 5.30  | 7.41                | 3.95               | 1.27                             | 0.48 | 8.63 | 5.3      |                                    | This study                        |
| 13LZ12-1 | Andesite          | 29.98    | 91.19     | Nianbo    | E2n | 54.5                | 56.00               | 0.88                              | 15.79                             | 9.90  | 0.17  | 5.60  | 5.55                | 3.96               | 1.79                             | 0.35 | 5.35 | 114      | 702                                | This study                        |
| 13LZ14-1 | Basaltic andesite | 29.98    | 91.19     | Nianbo    | E2n | 54.5                | 53.36               | 0.87                              | 17.98                             | 9.49  | 0.17  | 2.40  | 9.24                | 3.30               | 2.72                             | 0.48 | 4.84 | 5.9      |                                    | This study                        |
| 13LZ15-1 | Basaltic andesite | 29.98    | 91.19     | Nianbo    | E2n | 54.5                | 54.50               | 0.87                              | 17.58                             | 8.85  | 0.16  | 3.38  | 8.53                | 3.15               | 2.53                             | 0.44 | 3.65 |          |                                    | This study                        |
| 13LZ16-1 | Andesite          | 29.98    | 91.19     | Nianbo    | E2n | 52.7                | 57.01               | 0.76                              | 18.43                             | 7.57  | 0.15  | 3.01  | 6.58                | 3.40               | 2.66                             | 0.43 | 6.93 | 157      | 737                                | This study                        |
| T235B    | Rhyolitic tuff    | 29.98    | 91.17     | Nianbo    | E2n | 54.9                | 78.21               | 0.12                              | 12.89                             | 1.10  | 0.04  | 0.33  | 1.58                | 2.82               | 2.90                             | 0.01 | 2.67 | 106      | 771                                | Lee et al., 2012, JAES            |
| T235A    | Rhyolitic tuff    | 29.98    | 91.17     | Nianbo    | E2n | 54.9                | 78.24               | 0.12                              | 13.24                             | 1.34  | 0.02  | 0.39  | 0.70                | 2.71               | 3.23                             | 0.01 | 2.23 | 141      | 810                                | Lee et al., 2012, JAES            |
| T234C    | Dacite            | 29.98    | 91.18     | Nianbo    | E2n | 54.5                | 68.36               | 0.57                              | 15.12                             | 5.20  | 0.07  | 1.13  | 2.97                | 4.31               | 1.99                             | 0.27 | 2.35 | 174      | 786                                | Lee et al., 2012, JAES            |
| T234B    | Basaltic andesite | 29.98    | 91.18     | Nianbo    | E2n | 54.5                | 53.07               | 0.88                              | 18.54                             | 9.39  | 0.16  | 3.20  | 8.78                | 3.02               | 2.50                             | 0.44 | 3.91 | 6.2      |                                    | Lee et al., 2012, JAES            |
| T234A    | Andesite          | 29.98    | 91.18     | Nianbo    | E2n | 54.5                | 56.72               | 0.71                              | 18.26                             | 7.53  | 0.15  | 2.98  | 6.78                | 3.25               | 3.28                             | 0.37 | 2.89 | 168      | 735                                | Lee et al., 2012, JAES            |



|          |                      |       |       |       |     |      |       |      |       |       |      |      |       |      |      |      |      |     |     |     |                                   |
|----------|----------------------|-------|-------|-------|-----|------|-------|------|-------|-------|------|------|-------|------|------|------|------|-----|-----|-----|-----------------------------------|
| 12LZ16-1 | Basalt               | 29.98 | 91.19 | Pa'na | E2p | 52.7 | 52.80 | 0.91 | 18.74 | 9.52  | 0.13 | 2.93 | 8.66  | 3.34 | 2.49 | 0.49 | 4.66 | 6.7 |     |     | This study                        |
| 12LZ17-1 | Basalt               | 29.98 | 91.19 | Pa'na | E2p | 52.7 | 52.73 | 0.89 | 18.20 | 9.33  | 0.14 | 3.82 | 8.54  | 3.41 | 2.46 | 0.48 | 2.93 | 6.0 |     |     | This study                        |
| 12LZ18-1 | Rhyolite             | 29.98 | 91.19 | Pa'na | E2p | 52.7 | 70.65 | 0.47 | 14.46 | 3.74  | 0.15 | 0.98 | 2.14  | 3.14 | 4.15 | 0.12 | 4.05 |     | 152 | 781 | This study                        |
| 12LZ23-1 | Rhyolitic ignimbrite | 29.99 | 91.14 | Pa'na | E2p | 52.2 | 75.45 | 0.21 | 14.41 | 1.22  | 0.05 | 0.11 | 0.22  | 2.95 | 5.32 | 0.07 | 1.29 |     | 136 | 796 | This study                        |
| 12LZ24-1 | Rhyolitic ignimbrite | 29.99 | 91.14 | Pa'na | E2p | 52.2 | 74.74 | 0.19 | 14.23 | 1.23  | 0.07 | 0.25 | 0.37  | 3.31 | 5.55 | 0.06 | 0.89 |     | 135 | 785 | This study                        |
| 12LZ25-1 | Rhyolite             | 29.99 | 91.14 | Pa'na | E2p | 52.2 | 71.11 | 0.35 | 15.32 | 2.27  | 0.05 | 0.33 | 1.49  | 3.11 | 5.86 | 0.12 | 2.50 |     | 270 | 835 | This study                        |
| 12LZ26-1 | Rhyolitic ignimbrite | 29.98 | 91.14 | Pa'na | E2p | 52.2 | 77.52 | 0.34 | 15.72 | 0.34  | 0.01 | 0.39 | 0.14  | 0.31 | 5.17 | 0.06 | 2.74 |     | 252 | 900 | This study                        |
| 13LZ06-1 | Rhyolite             | 30.00 | 91.15 | Pa'na | E2p | 52.2 | 71.34 | 0.31 | 14.07 | 2.62  | 0.11 | 0.77 | 2.60  | 2.89 | 5.18 | 0.09 | 3.08 |     | 140 | 761 | This study                        |
| 13LZ07-1 | Rhyolitic ignimbrite | 29.99 | 91.14 | Pa'na | E2p | 52.2 | 76.15 | 0.19 | 13.49 | 1.34  | 0.02 | 0.16 | 0.21  | 2.82 | 5.57 | 0.05 | 0.89 |     | 119 | 780 | This study                        |
| LZ9917   | Rhyolitic ignimbrite | 30.01 | 91.15 | Pa'na | E2p | 52.5 | 76.65 | 0.30 | 11.37 | 3.06  | 0.03 | 0.49 | 0.60  | 1.73 | 5.63 | 0.14 | 1.77 |     | 113 | 771 | Mo et al., 2008, Chemical Geology |
| LZ9916   | Rhyolitic ignimbrite | 30.01 | 91.15 | Pa'na | E2p | 52.5 | 80.26 | 0.31 | 9.83  | 2.76  | 0.02 | 0.23 | 0.39  | 2.32 | 3.71 | 0.16 | 1.12 |     | 101 | 767 | Mo et al., 2008, Chemical Geology |
| BD-103   | Rhyolitic ignimbrite | 30.01 | 91.14 | Pa'na | E2p | 52.5 | 70.22 | 0.37 | 14.02 | 3.72  | 0.10 | 0.87 | 2.87  | 2.93 | 4.76 | 0.14 | 3.39 |     | 150 | 764 | Mo et al., 2008, Chemical Geology |
| BD-106   | Rhyolitic ignimbrite | 30.01 | 91.14 | Pa'na | E2p | 52.5 | 69.35 | 0.37 | 14.68 | 4.05  | 0.11 | 0.73 | 3.21  | 2.54 | 4.80 | 0.16 | 3.93 |     | 176 | 781 | Mo et al., 2008, Chemical Geology |
| P-1      | Rhyolitic ignimbrite | 29.99 | 91.15 | Pa'na | E2p | 52.2 | 74.41 | 0.17 | 13.39 | 1.76  | 0.08 | 0.28 | 1.07  | 3.35 | 5.46 | 0.04 | 0.80 |     | 142 | 774 | Mo et al., 2008, Chemical Geology |
| 11LZ01-1 | Diabase dyke         | 29.97 | 91.15 |       |     | 52.9 | 51.35 | 0.94 | 18.94 | 9.20  | 0.15 | 3.44 | 8.07  | 3.15 | 4.28 | 0.48 | 6.15 | 5.2 |     |     | Jia et al., 2013                  |
| 11LZ01-2 | Diabase dyke         | 29.97 | 91.15 |       |     | 52.9 | 50.65 | 0.93 | 18.25 | 9.41  | 0.23 | 3.21 | 8.76  | 4.76 | 3.34 | 0.46 | 7.08 | 4.6 |     |     | Jia et al., 2013                  |
| 11LZ02-1 | Diabase dyke         | 29.97 | 91.15 |       |     | 52.9 | 51.92 | 0.95 | 18.58 | 9.55  | 0.15 | 4.75 | 7.41  | 2.87 | 3.36 | 0.47 | 5.58 | 5.1 |     |     | Jia et al., 2013                  |
| 11LZ02-2 | Diabase dyke         | 29.97 | 91.15 |       |     | 52.9 | 49.52 | 0.95 | 18.55 | 10.32 | 0.28 | 3.57 | 9.09  | 5.46 | 1.91 | 0.36 | 7.77 | 4.3 |     |     | Jia et al., 2013                  |
| 11LZ02-3 | Diabase dyke         | 29.97 | 91.15 |       |     | 52.9 | 52.41 | 0.84 | 18.91 | 9.52  | 0.17 | 3.34 | 6.95  | 3.63 | 3.77 | 0.46 | 5.72 | 4.9 |     |     | Jia et al., 2013                  |
| 11LZ03-1 | Diabase dyke         | 29.97 | 91.15 |       |     | 52.9 | 51.16 | 0.85 | 19.21 | 9.81  | 0.13 | 3.09 | 7.05  | 4.84 | 3.40 | 0.47 | 6.71 | 4.9 |     |     | Jia et al., 2013                  |
| 11LZ03-2 | Diabase dyke         | 29.97 | 91.15 |       |     | 52.9 | 51.91 | 0.87 | 19.18 | 9.51  | 0.17 | 3.91 | 7.13  | 3.69 | 3.17 | 0.46 | 5.99 | 4.9 |     |     | Jia et al., 2013                  |
| 11LZ04-1 | Diabase dyke         | 29.97 | 91.15 |       |     | 52.9 | 51.97 | 0.93 | 19.22 | 9.43  | 0.14 | 3.89 | 5.85  | 4.81 | 3.36 | 0.40 | 5.83 | 4.8 |     |     | Jia et al., 2013                  |
| 2003T320 | Diabase dyke         |       |       |       |     | 52.9 | 50.94 | 1.02 | 17.82 | 10.18 | 0.16 | 5.29 | 7.78  | 2.91 | 3.44 | 0.46 | 4.75 | 5.2 |     |     | Yue et al., 2006                  |
| 2003T324 | Diabase dyke         |       |       |       |     | 52.9 | 47.29 | 0.90 | 17.21 | 11.86 | 0.20 | 5.42 | 10.32 | 3.70 | 2.61 | 0.49 | 0.86 | 4.1 |     |     | Yue et al., 2006                  |
| 2003T348 | Diabase dyke         |       |       |       |     | 52.9 | 49.60 | 1.01 | 17.86 | 11.15 | 0.17 | 4.39 | 10.45 | 2.39 | 2.56 | 0.42 | 7.08 | 4.6 |     |     | Yue et al., 2006                  |
| 2003T350 | Diabase dyke         |       |       |       |     | 52.9 | 48.62 | 1.10 | 17.32 | 11.59 | 0.18 | 5.51 | 10.16 | 2.56 | 2.45 | 0.50 | 6.90 | 5.1 |     |     | Yue et al., 2006                  |
| 2003T353 | Diabase dyke         |       |       |       |     | 52.9 | 49.78 | 1.07 | 18.62 | 10.85 | 0.19 | 3.04 | 10.67 | 2.94 | 2.37 | 0.46 | 6.23 | 4.8 |     |     | Yue et al., 2006                  |
| 2003T363 | Diabase dyke         |       |       |       |     | 52.9 | 50.40 | 1.21 | 17.32 | 10.29 | 0.12 | 5.23 | 9.64  | 3.03 | 2.31 | 0.45 | 5.08 | 5.3 |     |     | Yue et al., 2006                  |

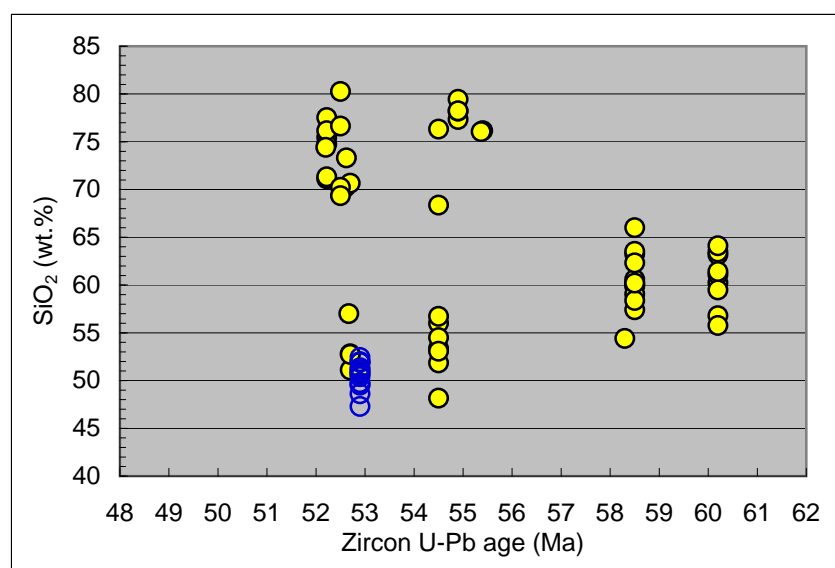

**Fig. 3a** Plot of SiO<sub>2</sub> content versus age (Ma) for the Linzong volcanic rocks in Linzhou Basin (see Table S4 for data)

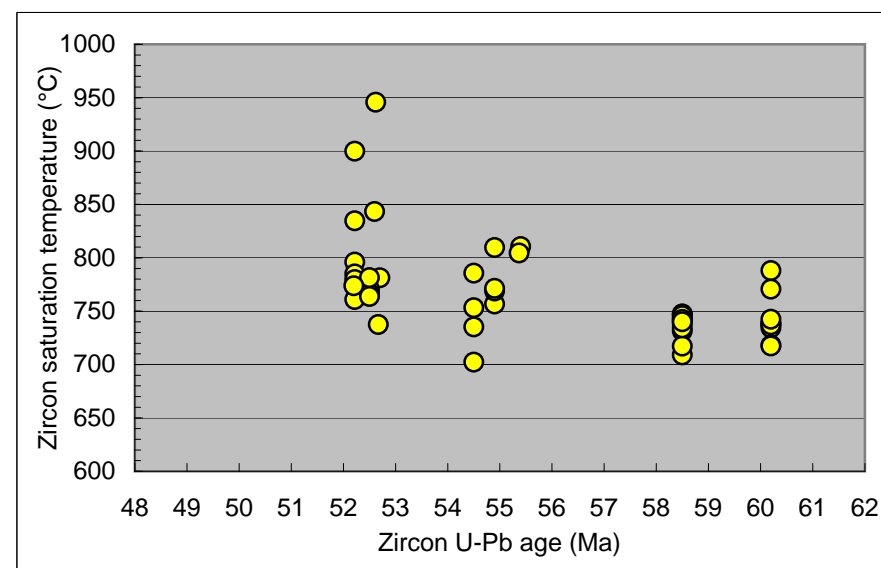

**Fig. 3b** Plot of zircon saturation temperature (°C) versus age (Ma) for the Linzong volcanic rocks (see Table S4 for data)

See captions of the **Figures 2a and 2b** in the text for details

**\*Note:** 1) Age data used for this table are from Table 1 and Yue and Ding (2006); 2) Major element contents are recalculated on an anhydrous basis. Zircon saturation temperatures were calculated from whole-rock compositions with SiO<sub>2</sub> > 56 wt.% following the method of Watson and Harrison (1983)

## Magmatic record of India-Asia collision

Di-Cheng Zhu\*, Qing Wang, Zhi-Dan Zhao, Sun-Lin Chung, Peter A. Cawood, Yaoling Niu, Sheng-Ao Liu, Fu-Yuan Wu, and Xuan-Xue Mo

**Table S5** SiO<sub>2</sub> contents of the 80-40 Ma intrusive rocks from the Gangdese Batholith (85–95°E) in southern Tibet

| No. | Sample  | Longitude | Latitude | Rock Type          | Age (Ma) | SiO <sub>2</sub> | References                                                 |
|-----|---------|-----------|----------|--------------------|----------|------------------|------------------------------------------------------------|
| 1   | 06FW101 | 91.11     | 29.69    | Monzogranite       | 64.7     | 72.29            | Ji et al., 2012, Journal of Asian Earth Sciences 53, 82–95 |
| 2   | 06FW104 | 91.08     | 29.68    | Monzogranite       | 64.4     | 71.71            | Ji et al., 2012, Journal of Asian Earth Sciences 53, 82–95 |
| 3   | 06FW105 | 90.93     | 29.68    | Monzogranite       | 55.2     | 67.62            | Ji et al., 2012, Journal of Asian Earth Sciences 53, 82–95 |
| 4   | 06FW108 | 90.78     | 29.76    | Granodiorite       | 56.8     | 62.25            | Ji et al., 2012, Journal of Asian Earth Sciences 53, 82–95 |
| 5   | 06FW110 | 90.83     | 29.74    | Monzogranite       | 54.3     | 73.45            | Ji et al., 2012, Journal of Asian Earth Sciences 53, 82–95 |
| 6   | 06FW111 | 90.96     | 29.44    | Monzogranite       | 50.6     | 66.49            | Ji et al., 2012, Journal of Asian Earth Sciences 53, 82–95 |
| 7   | 06FW112 | 90.96     | 29.49    | Granodiorite       | 53.4     | 60.23            | Ji et al., 2012, Journal of Asian Earth Sciences 53, 82–95 |
| 8   | 06FW118 | 90.94     | 29.50    | Monzogranite       | 51.0     | 73.27            | Ji et al., 2012, Journal of Asian Earth Sciences 53, 82–95 |
| 9   | 06FW119 | 90.94     | 29.50    | Granodiorite       | 51.2     | 63.91            | Ji et al., 2012, Journal of Asian Earth Sciences 53, 82–95 |
| 10  | 06FW120 | 90.94     | 29.50    | Dioritic enclave   | 50.3     | 51.94            | Ji et al., 2012, Journal of Asian Earth Sciences 53, 82–95 |
| 11  | 06FW121 | 90.94     | 29.50    | Graniticdike       | 51.1     | 75.29            | Ji et al., 2012, Journal of Asian Earth Sciences 53, 82–95 |
| 12  | 06FW126 | 90.87     | 29.48    | Granodiorite       | 55.3     | 56.62            | Ji et al., 2012, Journal of Asian Earth Sciences 53, 82–95 |
| 13  | 06FW127 | 90.87     | 29.48    | Graniticdike       | 49.5     | 77.16            | Ji et al., 2012, Journal of Asian Earth Sciences 53, 82–95 |
| 14  | 06FW128 | 90.87     | 29.48    | Doleriticdike      | 49.9     | 54.99            | Ji et al., 2012, Journal of Asian Earth Sciences 53, 82–95 |
| 15  | 06FW129 | 90.90     | 29.46    | Granodiorite       | 52.9     | 57.43            | Ji et al., 2012, Journal of Asian Earth Sciences 53, 82–95 |
| 16  | 06FW131 | 90.91     | 29.41    | Tonalitic gneiss   | 44.0     | 69.90            | Ji et al., 2012, Journal of Asian Earth Sciences 53, 82–95 |
| 17  | 06FW133 | 90.87     | 29.33    | Monzonite          | 47.1     | 67.45            | Ji et al., 2012, Journal of Asian Earth Sciences 53, 82–95 |
| 18  | 06FW134 | 90.88     | 29.36    | Monzogranite       | 41.9     | 70.57            | Ji et al., 2012, Journal of Asian Earth Sciences 53, 82–95 |
| 19  | 06FW139 | 90.88     | 29.38    | Monzonite          | 41.5     | 61.01            | Ji et al., 2012, Journal of Asian Earth Sciences 53, 82–95 |
| 20  | 06FW140 | 90.72     | 29.47    | Monzogranite       | 43.7     | 70.99            | Ji et al., 2012, Journal of Asian Earth Sciences 53, 82–95 |
| 21  | 06FW146 | 90.72     | 29.40    | Monzodiorite       | 56.9     | 52.88            | Ji et al., 2012, Journal of Asian Earth Sciences 53, 82–95 |
| 22  | 06FW147 | 90.72     | 29.37    | Granodiorite       | 51.5     | 61.42            | Ji et al., 2012, Journal of Asian Earth Sciences 53, 82–95 |
| 23  | 06FW148 | 90.72     | 29.37    | Syenogranitic dyke | 51.3     | 71.69            | Ji et al., 2012, Journal of Asian Earth Sciences 53, 82–95 |
| 24  | 06FW151 | 90.72     | 29.36    | Diorite            | 55.5     | 56.09            | Ji et al., 2012, Journal of Asian Earth Sciences 53, 82–95 |

|    |           |       |       |                       |      |       |                                                                    |
|----|-----------|-------|-------|-----------------------|------|-------|--------------------------------------------------------------------|
| 25 | 06FW152-2 | 90.18 | 29.40 | Diorite               | 57.3 | 53.49 | Ji et al., 2012, Journal of Asian Earth Sciences 53, 82–95         |
| 26 | 06FW154   | 90.27 | 29.58 | Syenogranite          | 51.3 | 75.43 | Ji et al., 2012, Journal of Asian Earth Sciences 53, 82–95         |
| 27 | 06FW155   | 90.27 | 29.54 | Monzodiorite          | 61.1 | 70.33 | Ji et al., 2012, Journal of Asian Earth Sciences 53, 82–95         |
| 28 | 06FW156   | 90.27 | 29.50 | Monzodiorite          | 55.4 | 67.99 | Ji et al., 2012, Journal of Asian Earth Sciences 53, 82–95         |
| 29 | 06FW162   | 89.62 | 29.54 | Granodiorite          | 48.2 | 60.29 | Ji et al., 2012, Journal of Asian Earth Sciences 53, 82–95         |
| 30 | 06FW163   | 89.62 | 29.54 | Monzogranite          | 50.9 | 71.58 | Ji et al., 2012, Journal of Asian Earth Sciences 53, 82–95         |
| 31 | 06FW174   | 90.10 | 29.35 | Diorite               | 50.2 | 56.45 | Ji et al., 2012, Journal of Asian Earth Sciences 53, 82–95         |
| 32 | 06FW175   | 90.07 | 29.35 | Diorite               | 52.6 | 57.57 | Ji et al., 2012, Journal of Asian Earth Sciences 53, 82–95         |
| 33 | 06FW176   | 90.25 | 29.34 | Diorite               | 53.6 | 54.48 | Ji et al., 2012, Journal of Asian Earth Sciences 53, 82–95         |
| 34 | 08CQ01    | 85.74 | 29.63 | Syenogranite          | 43.9 | 76.87 | Wang and Zhu et al., 2014, To be submitted                         |
| 35 | 08CQ02    | 85.74 | 29.63 | Syenogranite          | 43.9 | 78.07 | Zhu et al., 2011, Earth and Planetary Science Letters 301, 241–255 |
| 36 | 08CQ03    | 85.76 | 29.78 | Monzogranite          | 51.9 | 67.92 | Zhu et al., 2011, Earth and Planetary Science Letters 301, 241–255 |
| 37 | 08CQ09    | 85.74 | 29.90 | Granodiorite porphyry | 50.0 | 68.52 | Zhu et al., 2011, Earth and Planetary Science Letters 301, 241–255 |
| 38 | 08CQ13    | 85.41 | 30.14 | Diorite               | 51.5 | 54.04 | Zhu et al., 2011, Earth and Planetary Science Letters 301, 241–255 |
| 39 | 08DX01    | 90.57 | 30.01 | Diorite               | 69.8 | 55.57 | Zhu et al., unpublished data                                       |
| 40 | 08FW50    | 91.18 | 29.64 | Granodiorite          | 67.1 | 68.13 | Ji, W.Q., 2010, Ph.D thesis, p. 1–146                              |
| 41 | 08FW51    | 91.16 | 29.64 | Granodiorite          | 64.5 | 66.35 | Ji et al., 2012, Journal of Asian Earth Sciences 53, 82–95         |
| 42 | 08FW54    | 91.99 | 29.73 | Diorite               | 65.6 | 54.83 | Ji, W.Q., 2010, Ph.D thesis, p. 1–146                              |
| 43 | 08FW56    | 92.20 | 29.71 | Monzogranite          | 70.5 | 65.58 | Ji, W.Q., 2010, Ph.D thesis, p. 1–146                              |
| 44 | 08FW60    | 93.78 | 29.81 | Monzogranite          | 47.6 | 77.24 | Ji, W.Q., 2010, Ph.D thesis, p. 1–146                              |
| 45 | 08FW61    | 94.01 | 29.76 | Syenogranite          | 53.8 | 75.98 | Ji, W.Q., 2010, Ph.D thesis, p. 1–146                              |
| 46 | 08FW62    | 94.29 | 29.74 | Monzogranite          | 72.7 | 74.05 | Ji, W.Q., 2010, Ph.D thesis, p. 1–146                              |
| 47 | 08FW63    | 94.19 | 29.75 | Monzogranite          | 53.0 | 73.05 | Ji, W.Q., 2010, Ph.D thesis, p. 1–146                              |
| 48 | 08FW66    | 92.04 | 29.72 | Syenogranite          | 70.1 | 76.03 | Ji, W.Q., 2010, Ph.D thesis, p. 1–146                              |
| 49 | 09FW08    | 93.31 | 29.62 | Gabbro                | 66.0 | 47.34 | Ji, W.Q., 2010, Ph.D thesis, p. 1–146                              |
| 50 | 09FW09    | 93.31 | 29.62 | Diorite               | 66.6 | 54.38 | Ji, W.Q., 2010, Ph.D thesis, p. 1–146                              |
| 51 | 09FW10    | 93.31 | 29.62 | Gneissic granodiorite | 66.2 | 65.52 | Ji, W.Q., 2010, Ph.D thesis, p. 1–146                              |
| 52 | 09FW30    | 93.20 | 29.15 | Two-mica Monzogranite | 76.7 | 72.25 | Ji, W.Q., 2010, Ph.D thesis, p. 1–146                              |
| 53 | 09FW33    | 93.18 | 29.12 | Two-mica Monzogranite | 79.7 | 72.76 | Ji, W.Q., 2010, Ph.D thesis, p. 1–146                              |
| 54 | 09FW41    | 92.74 | 29.42 | Monzogranite          | 56.1 | 70.44 | Ji et al., 2012, Journal of Asian Earth Sciences 53, 82–95         |

|    |           |       |       |                       |      |       |                                                               |
|----|-----------|-------|-------|-----------------------|------|-------|---------------------------------------------------------------|
| 55 | 09FW42    | 92.75 | 29.41 | Monzogranite          | 50.7 | 69.74 | Ji et al., 2012, Journal of Asian Earth Sciences 53, 82–95    |
| 56 | 09FW43    | 92.75 | 29.41 | Monzogranite          | 42.0 | 70.66 | Ji et al., 2012, Journal of Asian Earth Sciences 53, 82–95    |
| 57 | 09FW50    | 92.70 | 29.24 | Granodiorite          | 50.2 | 67.85 | Ji et al., 2012, Journal of Asian Earth Sciences 53, 82–95    |
| 58 | 10CK-02   | 86.14 | 30.37 | Granitic porphyry     | 65.2 | 68.00 | Wang et al., 2012, Acta Petrologica Sinica, 28(5), 1647–1662  |
| 59 | 10CK-03   | 86.14 | 30.37 | Granitic porphyry     | 65.2 | 76.89 | Wang et al., 2012, Acta Petrologica Sinica, 28(5), 1647–1662  |
| 60 | 10CK-04   | 86.14 | 30.37 | Granitic porphyry     | 65.2 | 75.49 | Wang et al., 2012, Acta Petrologica Sinica, 28(5), 1647–1662  |
| 61 | 10CK-07   | 86.14 | 30.37 | Granitic porphyry     | 64.4 | 75.66 | Wang et al., 2012, Acta Petrologica Sinica, 28(5), 1647–1662  |
| 62 | 10CK-08   | 86.14 | 30.37 | Granitic porphyry     | 64.4 | 76.18 | Wang et al., 2012, Acta Petrologica Sinica, 28(5), 1647–1662  |
| 63 | 10CK-10   | 86.14 | 30.37 | Granitic porphyry     | 64.4 | 75.98 | Wang et al., 2012, Acta Petrologica Sinica, 28(5), 1647–1662  |
| 64 | 10CK-11   | 86.14 | 30.37 | Granitic porphyry     | 64.4 | 77.01 | Wang et al., 2012, Acta Petrologica Sinica, 28(5), 1647–1662  |
| 65 | 10CK-14   | 86.14 | 30.37 | Granitic porphyry     | 64.4 | 68.86 | Wang et al., 2012, Acta Petrologica Sinica, 28(5), 1647–1662  |
| 66 | 12DJC12-1 | 85.72 | 29.63 | Syenogranite          | 42.6 | 69.79 | Wang and Zhu et al., 2014, To be submitted                    |
| 67 | 12DJC13-1 | 85.74 | 29.63 | Syenogranite          | 42.6 | 68.66 | Wang and Zhu et al., 2014, To be submitted                    |
| 68 | 12DJC13-2 | 85.74 | 29.63 | Syenogranite          | 42.7 | 71.49 | Wang and Zhu et al., 2014, To be submitted                    |
| 69 | 12DJC14-1 | 85.74 | 29.63 | Syenogranite          | 43.6 | 71.59 | Wang and Zhu et al., 2014, To be submitted                    |
| 70 | 12DJC14-2 | 85.74 | 29.63 | Monzogranite          | 43.6 | 71.62 | Wang and Zhu et al., 2014, To be submitted                    |
| 71 | 12DJC14-3 | 85.74 | 29.63 | Syenogranite          | 43.6 | 75.59 | Wang and Zhu et al., 2014, To be submitted                    |
| 72 | 12DJC15-1 | 85.74 | 29.63 | Monzogranite          | 43.6 | 76.85 | Wang and Zhu et al., 2014, To be submitted                    |
| 73 | 12DJC15-2 | 85.74 | 29.63 | Syenogranite          | 43.6 | 70.08 | Wang and Zhu et al., 2014, To be submitted                    |
| 74 | 12DJC15-3 | 85.74 | 29.63 | Syenogranite          | 43.6 | 74.72 | Wang and Zhu et al., 2014, To be submitted                    |
| 75 | 12DJC16-1 | 85.74 | 29.62 | Syenogranite          | 43.6 | 77.01 | Wang and Zhu et al., 2014, To be submitted                    |
| 76 | 12DJC16-2 | 85.74 | 29.62 | Monzogranite          | 43.6 | 77.25 | Wang and Zhu et al., 2014, To be submitted                    |
| 77 | 12DJC16-3 | 85.74 | 29.62 | Monzogranite          | 43.9 | 76.33 | Wang and Zhu et al., 2014, To be submitted                    |
| 78 | LS2       | 91.00 | 29.89 | Granodiorite          | 51.0 | 69.59 | Huang et al., 2010. Acta Petrologica Sinica 26, 10, 3131–3142 |
| 79 | LS3       | 91.00 | 29.89 | Dioritic enclave      | 61.0 | 54.14 | Huang et al., 2010. Acta Petrologica Sinica 26, 10, 3131–3142 |
| 80 | LS4       | 91.27 | 29.68 | Diorite               | 61.0 | 54.15 | Huang et al., 2010. Acta Petrologica Sinica 26, 10, 3131–3142 |
| 81 | LS5       | 91.24 | 29.69 | Diorite               | 61.0 | 56.09 | Huang et al., 2010. Acta Petrologica Sinica 26, 10, 3131–3142 |
| 82 | LZ09-2    | 94.47 | 29.55 | Granitic gneiss       | 51.4 | 75.22 | Ji, W.Q., 2010, Ph.D thesis, p. 1–146                         |
| 83 | LZ11-1    | 94.46 | 29.46 | Gneissic granodiorite | 44.3 | 73.11 | Ji, W.Q., 2010, Ph.D thesis, p. 1–146                         |
| 84 | LZ13-1    | 94.38 | 29.64 | Granodiorite          | 67.1 | 68.23 | Ji, W.Q., 2010, Ph.D thesis, p. 1–146                         |

|     |         |       |       |                       |      |       |                                                                    |
|-----|---------|-------|-------|-----------------------|------|-------|--------------------------------------------------------------------|
| 85  | LZ15-5  | 94.35 | 29.63 | Dioritic enclave      | 64.0 | 55.22 | Ji, W.Q., 2010, Ph.D thesis, p. 1–146                              |
| 86  | LZ16-2  | 94.37 | 29.60 | Granodiorite          | 67.4 | 61.56 | Ji, W.Q., 2010, Ph.D thesis, p. 1–146                              |
| 87  | LZ17-1  | 94.43 | 29.46 | Two-mica monzogranite | 51.7 | 73.23 | Ji, W.Q., 2010, Ph.D thesis, p. 1–146                              |
| 88  | ML05-1  | 93.77 | 29.14 | Monzogranite          | 78.4 | 70.93 | Ji, W.Q., 2010, Ph.D thesis, p. 1–146                              |
| 89  | ML05-1  | 93.35 | 29.04 | Granodiorite          | 79.3 | 67.17 | Guan et al., 2010, Acta Petrologica Sinica 26, 2165–2179           |
| 90  | ML06-1  | 93.37 | 29.05 | Granodiorite          | 79.3 | 70.58 | Zhu et al., 2011, Earth and Planetary Science Letters 301, 241–255 |
| 91  | ML07-1  | 93.52 | 29.17 | Granodiorite          | 73.5 | 69.88 | Ji, W.Q., 2010, Ph.D thesis, p. 1–146                              |
| 92  | ML08-1  | 93.47 | 29.15 | Monzogranite          | 73.0 | 74.08 | Ji, W.Q., 2010, Ph.D thesis, p. 1–146                              |
| 93  | ML08-1  | 93.39 | 29.09 | Monzogranite          | 79.3 | 70.67 | Guan et al., 2010, Acta Petrologica Sinica 26, 2165–2179           |
| 94  | ML09-1  | 93.38 | 29.06 | Monzogranite          | 78.0 | 72.48 | Ji, W.Q., 2010, Ph.D thesis, p. 1–146                              |
| 95  | ML11-1  | 93.12 | 29.11 | Two-mica granite      | 75.0 | 72.15 | Ji, W.Q., 2010, Ph.D thesis, p. 1–146                              |
| 96  | ML18-1  | 93.68 | 29.15 | Gabbroic enclave      | 38.5 | 51.08 | Guan et al., 2012, Gondwana Research 21, 88–99                     |
| 97  | ML18-10 | 93.68 | 29.15 | Granodiorite          | 37.4 | 65.91 | Guan et al., 2012, Gondwana Research 21, 88–99                     |
| 98  | ML18-2  | 93.68 | 29.15 | Granodiorite          | 37.4 | 71.03 | Guan et al., 2012, Gondwana Research 21, 88–99                     |
| 99  | ML18-3  | 93.68 | 29.15 | Granodiorite          | 37.4 | 66.59 | Guan et al., 2012, Gondwana Research 21, 88–99                     |
| 100 | ML18-4  | 93.68 | 29.15 | Dioritic enclave      | 38.5 | 54.80 | Guan et al., 2012, Gondwana Research 21, 88–99                     |
| 101 | ML18-5  | 93.68 | 29.15 | Dioritic enclave      | 38.5 | 56.29 | Guan et al., 2012, Gondwana Research 21, 88–99                     |
| 102 | ML18-6  | 93.68 | 29.15 | Dioritic enclave      | 38.5 | 55.97 | Guan et al., 2012, Gondwana Research 21, 88–99                     |
| 103 | ML18-7  | 93.68 | 29.15 | Granodiorite          | 37.4 | 66.35 | Guan et al., 2012, Gondwana Research 21, 88–99                     |
| 104 | ML18-8  | 93.68 | 29.15 | Granodiorite          | 37.4 | 65.26 | Guan et al., 2012, Gondwana Research 21, 88–99                     |
| 105 | ML18-9  | 93.68 | 29.15 | Granodiorite          | 37.4 | 68.07 | Guan et al., 2012, Gondwana Research 21, 88–99                     |
| 106 | ML19-1  | 93.75 | 29.13 | Monzogranite          | 78.1 | 70.68 | Guan et al., 2010, Acta Petrologica Sinica 26, 2165–2179           |
| 107 | ML25-1  | 94.43 | 29.46 | Monzogranite          | 56.7 | 76.11 | Zhu et al., unpublished data                                       |
| 108 | ML26-1  | 94.35 | 29.63 | Granodiorite          | 64.8 | 66.17 | Zhu et al., unpublished data                                       |
| 109 | ML26-2  | 94.35 | 29.63 | Monzogranite          | 64.8 | 73.82 | Zhu et al., unpublished data                                       |
| 110 | ML28-1  | 94.24 | 29.76 | Monzogranite          | 54.5 | 70.23 | Zhu et al., unpublished data                                       |
| 111 | ML37-1  | 93.30 | 29.60 | Monzogranite          | 70.1 | 70.96 | Zhu et al., unpublished data                                       |
| 112 | ML37-2  | 93.30 | 29.60 | Dioritic enclave      | 69.8 | 55.62 | Zhu et al., unpublished data                                       |
| 113 | ML37-3  | 93.30 | 29.60 | Dioritic enclave      | 70.1 | 55.79 | Zhu et al., unpublished data                                       |
| 114 | ML37-5  | 93.30 | 29.60 | Gabbroic enclave      | 69.8 | 50.46 | Zhu et al., unpublished data                                       |

|     |           |       |       |                           |      |       |                                                                                |
|-----|-----------|-------|-------|---------------------------|------|-------|--------------------------------------------------------------------------------|
| 115 | ML38-2    | 93.30 | 29.60 | Gabbroic enclave          | 69.5 | 48.23 | Zhu et al., unpublished data                                                   |
| 116 | ML38-3    | 93.30 | 29.60 | Gabbroic enclave          | 69.5 | 49.57 | Zhu et al., unpublished data                                                   |
| 117 | ML38-6    | 93.30 | 29.60 | Gabbroic enclave          | 69.5 | 47.97 | Zhu et al., unpublished data                                                   |
| 118 | NML03-1   | 89.06 | 29.62 | Diorite                   | 62.4 | 58.03 | Zhu et al., 2011, Earth and Planetary Science Letters 301, 241–255             |
| 119 | RB10      | 89.69 | 29.36 | Gabbro                    | 45.0 | 50.84 | Huang et al., 2010. Acta Petrologica Sinica 26, 10, 3131–3142                  |
| 120 | RB12      | 89.69 | 29.36 | Diorite                   | 45.0 | 54.73 | Huang et al., 2010. Acta Petrologica Sinica 26, 10, 3131–3142                  |
| 121 | RB15      | 89.69 | 29.36 | Gabbroic enclave          | 45.0 | 49.80 | Huang et al., 2010. Acta Petrologica Sinica 26, 10, 3131–3142                  |
| 122 | SR01-1    | 92.10 | 29.29 | Granodiorite              | 45.4 | 62.52 | Ji et al., 2012, Journal of Asian Earth Sciences 53, 82–95                     |
| 123 | SR02-1    | 92.12 | 29.29 | Granite                   | 37.7 | 72.05 | Ji et al., 2012, Journal of Asian Earth Sciences 53, 82–95                     |
| 124 | SR03-1    | 92.22 | 29.27 | Granodiorite              | 59.8 | 71.48 | Ji et al., 2012, Journal of Asian Earth Sciences 53, 82–95                     |
| 125 | SR04-1    | 92.24 | 29.32 | Granodiorite              | 42.1 | 61.81 | Ji et al., 2012, Journal of Asian Earth Sciences 53, 82–95                     |
| 126 | T024      | 93.75 | 29.14 | Granodiorite              | 80.4 | 69.53 | Wen et al., 2008, Lithos 105, 1–11                                             |
| 127 | T026      | 93.44 | 29.12 | Granodiorite              | 80.4 | 70.11 | Wen et al., 2008, Lithos 105, 1–11                                             |
| 128 | T10-113-8 | 94.44 | 29.55 | Grt two-mica granite      | 63.3 | 72.21 | Zhang et al., 2013, Journal of Petrology 54, 12, 2547–2580                     |
| 129 | T10-123-2 | 94.41 | 29.61 | Two-mica granite          | 61.9 | 75.57 | Zhang et al., 2013, Journal of Petrology 54, 12, 2547–2580                     |
| 130 | T10-72-2  | 94.79 | 29.96 | Grt two-mica granodiorite | 65.9 | 68.34 | Zhang et al., 2013, Journal of Petrology 54, 12, 2547–2580                     |
| 131 | T215      | 93.41 | 29.10 | Tonalite                  | 80.4 | 68.28 | Wen et al., 2008, Lithos 105, 1–11                                             |
| 132 | T216A     | 93.61 | 29.17 | Tonalite                  | 80.4 | 67.89 | Wen et al., 2008, Lithos 105, 1–11                                             |
| 133 | T217      | 93.64 | 29.14 | Tonalite                  | 80.4 | 68.78 | Wen et al., 2008, Lithos 105, 1–11                                             |
| 134 | T218B     | 93.75 | 29.14 | Tonalite                  | 80.4 | 67.79 | Wen et al., 2008, Lithos 105, 1–11                                             |
| 135 | T300      | 90.95 | 29.54 | Granodiorite              | 50.3 | 65.58 | Xu, W.C., 2010. Ph.D thesis, China University of Geosciences (Wuhan), p. 1–172 |
| 136 | T308      | 90.93 | 29.48 | Granodiorite              | 50.7 | 64.95 | Xu, W.C., 2010. Ph.D thesis, China University of Geosciences (Wuhan), p. 1–172 |
| 137 | T315      | 90.87 | 29.38 | Qtz diorite               | 40.5 | 59.77 | Xu, W.C., 2010. Ph.D thesis, China University of Geosciences (Wuhan), p. 1–172 |
| 138 | T316      | 90.87 | 29.38 | Qtz diorite               | 47.1 | 61.49 | Xu, W.C., 2010. Ph.D thesis, China University of Geosciences (Wuhan), p. 1–172 |
| 139 | T318      | 90.87 | 29.38 | Qtz diorite               | 47.1 | 60.91 | Xu, W.C., 2010. Ph.D thesis, China University of Geosciences (Wuhan), p. 1–172 |
| 140 | T319      | 90.73 | 29.35 | Qtz diorite               | 47.1 | 63.72 | Xu, W.C., 2010. Ph.D thesis, China University of Geosciences (Wuhan), p. 1–172 |
| 141 | T364      | 90.27 | 29.51 | Granodiorite              | 46.7 | 69.97 | Xu, W.C., 2010. Ph.D thesis, China University of Geosciences (Wuhan), p. 1–172 |
| 142 | T365      | 90.27 | 29.51 | Granodiorite              | 46.7 | 66.80 | Xu, W.C., 2010. Ph.D thesis, China University of Geosciences (Wuhan), p. 1–172 |
| 143 | T366      | 90.27 | 29.51 | Granodiorite              | 46.7 | 62.78 | Xu, W.C., 2010. Ph.D thesis, China University of Geosciences (Wuhan), p. 1–172 |
| 144 | T375      | 90.06 | 29.51 | Qtz diorite               | 54.1 | 61.85 | Xu, W.C., 2010. Ph.D thesis, China University of Geosciences (Wuhan), p. 1–172 |

|     |      |       |       |              |      |       |                                                                                |
|-----|------|-------|-------|--------------|------|-------|--------------------------------------------------------------------------------|
| 145 | T376 | 90.06 | 29.51 | Granodiorite | 54.1 | 66.31 | Xu, W.C., 2010. Ph.D thesis, China University of Geosciences (Wuhan), p. 1–172 |
| 146 | T377 | 90.06 | 29.51 | Granodiorite | 54.1 | 66.43 | Xu, W.C., 2010. Ph.D thesis, China University of Geosciences (Wuhan), p. 1–172 |
| 147 | T378 | 90.05 | 29.52 | Granodiorite | 54.1 | 67.46 | Xu, W.C., 2010. Ph.D thesis, China University of Geosciences (Wuhan), p. 1–172 |
| 148 | T390 | 90.12 | 29.35 | Qtz diorite  | 48.5 | 61.02 | Xu, W.C., 2010. Ph.D thesis, China University of Geosciences (Wuhan), p. 1–172 |
| 149 | T391 | 90.02 | 29.34 | Diorite      | 48.5 | 54.18 | Xu, W.C., 2010. Ph.D thesis, China University of Geosciences (Wuhan), p. 1–172 |
| 150 | T392 | 88.37 | 29.95 | Monzogranite | 47.9 | 70.66 | Xu, W.C., 2010. Ph.D thesis, China University of Geosciences (Wuhan), p. 1–172 |
| 151 | T393 | 88.37 | 29.95 | Monzogranite | 47.9 | 70.32 | Xu, W.C., 2010. Ph.D thesis, China University of Geosciences (Wuhan), p. 1–172 |
| 152 | T395 | 88.37 | 29.95 | Monzogranite | 47.9 | 71.35 | Xu, W.C., 2010. Ph.D thesis, China University of Geosciences (Wuhan), p. 1–172 |
| 153 | T396 | 88.39 | 29.87 | Monzogranite | 47.9 | 76.28 | Xu, W.C., 2010. Ph.D thesis, China University of Geosciences (Wuhan), p. 1–172 |
| 154 | T398 | 88.39 | 29.83 | Monzogranite | 47.9 | 75.32 | Xu, W.C., 2010. Ph.D thesis, China University of Geosciences (Wuhan), p. 1–172 |
| 155 | T405 | 88.32 | 29.56 | Monzogranite | 49.0 | 68.88 | Xu, W.C., 2010. Ph.D thesis, China University of Geosciences (Wuhan), p. 1–172 |
| 156 | T406 | 88.32 | 29.56 | Monzogranite | 49.0 | 66.31 | Xu, W.C., 2010. Ph.D thesis, China University of Geosciences (Wuhan), p. 1–172 |
| 157 | T410 | 88.32 | 29.51 | Monzogranite | 49.0 | 66.86 | Xu, W.C., 2010. Ph.D thesis, China University of Geosciences (Wuhan), p. 1–172 |
| 158 | T411 | 88.32 | 29.48 | Monzogranite | 49.0 | 69.13 | Xu, W.C., 2010. Ph.D thesis, China University of Geosciences (Wuhan), p. 1–172 |
| 159 | T420 | 87.45 | 29.38 | Granodiorite | 48.1 | 63.24 | Xu, W.C., 2010. Ph.D thesis, China University of Geosciences (Wuhan), p. 1–172 |
| 160 | T426 | 86.21 | 29.6  | Monzogranite | 50.5 | 67.72 | Xu, W.C., 2010. Ph.D thesis, China University of Geosciences (Wuhan), p. 1–172 |
| 161 | T427 | 86.21 | 29.58 | Monzogranite | 50.5 | 69.93 | Xu, W.C., 2010. Ph.D thesis, China University of Geosciences (Wuhan), p. 1–172 |
| 162 | T430 | 86.21 | 29.58 | Monzogranite | 48.2 | 68.12 | Xu, W.C., 2010. Ph.D thesis, China University of Geosciences (Wuhan), p. 1–172 |
| 163 | T432 | 86.22 | 29.57 | Monzogranite | 48.2 | 70.32 | Xu, W.C., 2010. Ph.D thesis, China University of Geosciences (Wuhan), p. 1–172 |
| 164 | T439 | 89.10 | 29.46 | Granodiorite | 49.4 | 65.92 | Xu, W.C., 2010. Ph.D thesis, China University of Geosciences (Wuhan), p. 1–172 |
| 165 | T440 | 89.10 | 29.47 | Qtz diorite  | 49.4 | 60.28 | Xu, W.C., 2010. Ph.D thesis, China University of Geosciences (Wuhan), p. 1–172 |
| 166 | T442 | 89.09 | 29.53 | Qtz diorite  | 49.4 | 61.65 | Xu, W.C., 2010. Ph.D thesis, China University of Geosciences (Wuhan), p. 1–172 |
| 167 | T443 | 89.08 | 29.55 | Qtz diorite  | 49.4 | 61.10 | Xu, W.C., 2010. Ph.D thesis, China University of Geosciences (Wuhan), p. 1–172 |
| 168 | T445 | 89.06 | 29.62 | Monzogranite | 40.7 | 74.36 | Xu, W.C., 2010. Ph.D thesis, China University of Geosciences (Wuhan), p. 1–172 |
| 169 | T446 | 89.06 | 29.63 | Granodiorite | 50.9 | 64.67 | Xu, W.C., 2010. Ph.D thesis, China University of Geosciences (Wuhan), p. 1–172 |
| 170 | T447 | 89.06 | 29.63 | Granodiorite | 50.9 | 64.88 | Xu, W.C., 2010. Ph.D thesis, China University of Geosciences (Wuhan), p. 1–172 |
| 171 | T477 | 90.93 | 29.67 | Granodiorite | 49.9 | 68.54 | Xu, W.C., 2010. Ph.D thesis, China University of Geosciences (Wuhan), p. 1–172 |
| 172 | T478 | 90.93 | 29.67 | Monzogranite | 46.4 | 67.58 | Xu, W.C., 2010. Ph.D thesis, China University of Geosciences (Wuhan), p. 1–172 |
| 173 | T479 | 90.60 | 30.04 | Monzogranite | 49.6 | 71.22 | Xu, W.C., 2010. Ph.D thesis, China University of Geosciences (Wuhan), p. 1–172 |
| 174 | T490 | 91.98 | 29.73 | Monzogranite | 65.3 | 71.45 | Xu, W.C., 2010. Ph.D thesis, China University of Geosciences (Wuhan), p. 1–172 |

|     |          |       |       |                           |      |       |                                                                                |
|-----|----------|-------|-------|---------------------------|------|-------|--------------------------------------------------------------------------------|
| 175 | T491     | 92.02 | 29.72 | Monzogranite              | 65.3 | 72.81 | Xu, W.C., 2010. Ph.D thesis, China University of Geosciences (Wuhan), p. 1–172 |
| 176 | T493     | 92.02 | 29.72 | Monzogranite              | 65.3 | 73.13 | Xu, W.C., 2010. Ph.D thesis, China University of Geosciences (Wuhan), p. 1–172 |
| 177 | T497     | 92.15 | 29.71 | Granodiorite              | 67.7 | 64.12 | Xu, W.C., 2010. Ph.D thesis, China University of Geosciences (Wuhan), p. 1–172 |
| 178 | T498     | 92.15 | 29.71 | Granodiorite              | 67.7 | 64.12 | Xu, W.C., 2010. Ph.D thesis, China University of Geosciences (Wuhan), p. 1–172 |
| 179 | T500     | 92.15 | 29.71 | Granodiorite              | 67.7 | 69.31 | Xu, W.C., 2010. Ph.D thesis, China University of Geosciences (Wuhan), p. 1–172 |
| 180 | T529     | 94.43 | 29.45 | Granitic gneiss           | 49.1 | 73.93 | Xu, W.C., 2010. Ph.D thesis, China University of Geosciences (Wuhan), p. 1–172 |
| 181 | T554     | 92.20 | 29.30 | Monzogranite              | 59.7 | 68.71 | Xu, W.C., 2010. Ph.D thesis, China University of Geosciences (Wuhan), p. 1–172 |
| 182 | T555     | 92.20 | 29.30 | Monzogranite              | 59.7 | 70.02 | Xu, W.C., 2010. Ph.D thesis, China University of Geosciences (Wuhan), p. 1–172 |
| 183 | T556     | 92.20 | 29.30 | Monzogranite              | 59.7 | 69.71 | Xu, W.C., 2010. Ph.D thesis, China University of Geosciences (Wuhan), p. 1–172 |
| 184 | T557     | 92.20 | 29.30 | Monzogranite              | 59.7 | 67.69 | Xu, W.C., 2010. Ph.D thesis, China University of Geosciences (Wuhan), p. 1–172 |
| 185 | T560     | 93.18 | 29.26 | Fine-grained granite      | 60.9 | 70.00 | Xu, W.C., 2010. Ph.D thesis, China University of Geosciences (Wuhan), p. 1–172 |
| 186 | T562     | 93.18 | 29.26 | Fine-grained granite      | 60.9 | 70.05 | Xu, W.C., 2010. Ph.D thesis, China University of Geosciences (Wuhan), p. 1–172 |
| 187 | T672     | 94.47 | 29.55 | Leucosome                 | 50.3 | 79.89 | Guo et al., 2011, <i>Lithos</i> 127, 54–67                                     |
| 188 | T8-15-2  | 94.01 | 29.30 | Ep granodiorite           | 63.0 | 70.46 | Zhang et al., 2013, <i>Journal of Petrology</i> 54, 12, 2547–2580              |
| 189 | T9-30-2  | 94.35 | 29.63 | Ep granodiorite           | 63.2 | 64.41 | Zhang et al., 2013, <i>Journal of Petrology</i> 54, 12, 2547–2580              |
| 190 | T9-33-5  | 94.44 | 29.55 | Ep granodiorite           | 64.8 | 68.42 | Zhang et al., 2013, <i>Journal of Petrology</i> 54, 12, 2547–2580              |
| 191 | T9-33-7  | 94.44 | 29.55 | Grt two-mica granodiorite | 54.9 | 69.31 | Zhang et al., 2013, <i>Journal of Petrology</i> 54, 12, 2547–2580              |
| 192 | 11LS01-1 | 90.94 | 29.50 | Gabbro                    | 47.3 | 50.13 | Zhu et al., unpublished data                                                   |
| 193 | 11LS06-1 | 90.71 | 29.36 | Gabbroic diorite          | 46.2 | 54.35 | Zhu et al., unpublished data                                                   |
| 194 | 11NM01-1 | 90.27 | 29.34 | Gabbro                    | 46.5 | 46.90 | Zhu et al., unpublished data                                                   |
| 195 | 12AM03-1 | 86.31 | 29.64 | Granodiorite              | 53.1 | 66.45 | Zhu et al., unpublished data                                                   |
| 196 | 12AM04-2 | 86.32 | 29.63 | Gabbro                    | 44.8 | 52.03 | Zhu et al., unpublished data                                                   |
| 197 | 12AM06-2 | 86.32 | 29.58 | Monzogranite              | 51.2 | 73.02 | Zhu et al., unpublished data                                                   |
| 198 | 12CZ15-1 | 86.75 | 29.75 | Monzogranite              | 60.8 | 79.14 | Zhu et al., unpublished data                                                   |
| 199 | 12DJ01-1 | 87.71 | 29.42 | Granodiorite              | 55.1 | 71.99 | Zhu et al., unpublished data                                                   |
| 200 | 12DJ04-1 | 87.73 | 29.42 | Monzogranite              | 44.4 | 74.42 | Zhu et al., unpublished data                                                   |
| 201 | 12DJ08-1 | 87.79 | 29.44 | Granodiorite              | 51.8 | 66.09 | Zhu et al., unpublished data                                                   |
| 202 | 12DJ11-1 | 87.87 | 29.43 | Monzogranite              | 44.5 | 71.28 | Zhu et al., unpublished data                                                   |
| 203 | 12DJ12-1 | 87.87 | 29.43 | Granodiorite              | 44.3 | 66.72 | Zhu et al., unpublished data                                                   |
| 204 | 12DJ13-2 | 87.88 | 29.43 | Gabbro                    | 50.9 | 50.73 | Zhu et al., unpublished data                                                   |



|     |           |       |       |                           |      |       |                                                   |
|-----|-----------|-------|-------|---------------------------|------|-------|---------------------------------------------------|
| 205 | 12DJ15-1  | 87.90 | 29.43 | Granodiorite              | 51.9 | 66.54 | Zhu et al., unpublished data                      |
| 206 | 12DJ17-1  | 87.99 | 29.39 | Granodiorite              | 52.1 | 65.23 | Zhu et al., unpublished data                      |
| 207 | 12DJC09-3 | 85.79 | 29.78 | Granodiorite              | 51.5 | 67.07 | Zhu et al., unpublished data                      |
| 208 | 12LY00-1  | 89.24 | 29.72 | Monzogranite              | 51.0 | 77.02 | Zhu et al., unpublished data                      |
| 209 | 12LY01-1  | 89.24 | 29.76 | Granodiorite              | 50.4 | 67.98 | Zhu et al., unpublished data                      |
| 210 | 12PC02-2  | 87.97 | 29.56 | Gabbro                    | 55.0 | 49.26 | Zhu et al., unpublished data                      |
| 211 | 12PC12-1  | 87.99 | 29.38 | Diorite                   | 51.8 | 56.49 | Zhu et al., unpublished data                      |
| 212 | 12PC12-2  | 87.99 | 29.38 | Diorite                   | 51.1 | 58.60 | Zhu et al., unpublished data                      |
| 213 | ST104A    | 91.81 | 29.27 | Granodiorite              | 60.1 | 65.58 | Chu et al., 2006, <i>Geology</i> 34, 745–748      |
| 214 | P111-17   | 90.57 | 29.57 |                           | 46.1 | 70.29 | Ma et al., 2014, <i>Lithos</i> 196–197, 321–338   |
| 215 | D0175     | 90.57 | 29.57 |                           | 46.1 | 73.87 | Ma et al., 2014, <i>Lithos</i> 196–197, 321–338   |
| 216 | P111-03   | 90.55 | 29.52 |                           | 48.2 | 72.40 | Ma et al., 2014, <i>Lithos</i> 196–197, 321–338   |
| 217 | P111-04   | 90.55 | 29.52 |                           | 48.2 | 70.69 | Ma et al., 2014, <i>Lithos</i> 196–197, 321–338   |
| 218 | P111-05   | 90.55 | 29.52 |                           | 48.2 | 71.26 | Ma et al., 2014, <i>Lithos</i> 196–197, 321–338   |
| 219 | P111-06   | 90.55 | 29.52 |                           | 48.2 | 71.80 | Ma et al., 2014, <i>Lithos</i> 196–197, 321–338   |
| 220 | P111-07   | 90.55 | 29.52 |                           | 48.2 | 72.32 | Ma et al., 2014, <i>Lithos</i> 196–197, 321–338   |
| 221 | P111-08   | 90.55 | 29.52 |                           | 48.2 | 69.95 | Ma et al., 2014, <i>Lithos</i> 196–197, 321–338   |
| 222 | P111-16   | 90.55 | 29.52 |                           | 48.2 | 68.58 | Ma et al., 2014, <i>Lithos</i> 196–197, 321–338   |
| 223 | D0182     | 90.55 | 29.52 |                           | 48.2 | 66.37 | Ma et al., 2014, <i>Lithos</i> 196–197, 321–338   |
| 224 | P111-01   | 90.60 | 29.58 |                           | 48.6 | 75.95 | Ma et al., 2014, <i>Lithos</i> 196–197, 321–338   |
| 225 | P111-02   | 90.60 | 29.58 |                           | 48.6 | 74.51 | Ma et al., 2014, <i>Lithos</i> 196–197, 321–338   |
| 226 |           | 91.81 | 29.33 | Quartz diorite (northern) | 56.3 | 64.55 | Chen et al., 2015, <i>Lithos</i> 212–215, 379–396 |
| 227 |           | 91.81 | 29.33 | Quartz diorite (northern) | 56.3 | 64.09 | Chen et al., 2015, <i>Lithos</i> 212–215, 379–396 |
| 228 |           | 91.80 | 29.30 | Monzogranite              | 52.4 | 66.01 | Chen et al., 2015, <i>Lithos</i> 212–215, 379–396 |

---

# Magmatic record of India-Asia collision

Di-Cheng Zhu<sup>\*</sup>, Qing Wang, Zhi-Dan Zhao, Sun-Lin Chung, Peter A. Cawood, Yaoling Niu, Sheng-Ao Liu, Fu-Yuan Wu, and Xuan-Xue Mo

## Table S6: Calculation for the timing of collision

The timing of collision is calculated using the following equation similar to the ideas of Leech et al. (2005) and Donaldson et al. (2013), giving the timing as a function of depth of slab breakoff, age of slab breakoff, convergence rate, and slab dip.

$$\text{Timing of Collision} = \frac{\text{Depth of Slab Breakoff}}{(\text{Convergence Rate} \times \sin(\text{Slab Dip}))} + \text{Age of Slab Breakoff}$$

where, (1) the depth of slab breakoff is assumed to be occurred at 110, 120, 130, 140, and 150 km, given that the exhumed ultrahigh-pressure rocks at ca. 46 Ma (100 km in depth) may not represent the materials from the leading edge of subducted Indian continental margin, (2) the age of slab breakoff is the favored age in this study (ca. 53 Ma), (3) the convergence rates used here are changed from 170 to 150 mm/yr between 67 Ma and 51 Ma (van Hinsbergen et al., 2011), and (4) the slab dip is assumed to be changed from 30°, 45°, and 60° assuming that it increases with depth.

Calculated results indicate that the initial India-Asia collision was just 1–2 Ma before the slab breakoff, corresponding to a collision age of ca. 55 Ma.

## Table S6 Calculation for the timing of collision

| Depth of crust subducted | Convergence rate | Slab dip | Timing of slab breakoff | Initial collision age |
|--------------------------|------------------|----------|-------------------------|-----------------------|
| 100                      | 90               | 30       | 53                      | 55.2                  |
| 110                      | 150              | 30       | 53                      | 54.5                  |
| 110                      | 160              | 45       | 53                      | 54.0                  |
| 110                      | 170              | 60       | 53                      | 53.7                  |
| 120                      | 150              | 30       | 53                      | 54.6                  |
| 120                      | 160              | 45       | 53                      | 54.1                  |
| 120                      | 170              | 60       | 53                      | 53.8                  |
| 130                      | 150              | 30       | 53                      | 54.7                  |

|     |     |    |    |             |
|-----|-----|----|----|-------------|
| 130 | 160 | 45 | 53 | <b>54.1</b> |
| 130 | 170 | 60 | 53 | <b>53.9</b> |
| 140 | 150 | 30 | 53 | <b>54.9</b> |
| 140 | 160 | 45 | 53 | <b>54.2</b> |
| 140 | 170 | 60 | 53 | <b>54.0</b> |
| 150 | 150 | 30 | 53 | <b>55.0</b> |
| 150 | 160 | 45 | 53 | <b>54.3</b> |
| 150 | 170 | 60 | 53 | <b>54.0</b> |

## References:

Donaldson, D.G., Webb, A.A.G., Menold, C.A., Kylander-Clark, A.R.C., Hacker, B.R., 2013.

Petrochronology of Himalayan ultrahigh-pressure eclogite. *Geology* 41, 835–838.

Leech, M.L., Singh, S., Jain, A.K., Klempner, S.L., Manichavasgam, R.M., 2005. The onset of India-Asia continental collision: Early, steep subduction required by the timing of UHP metamorphism in the western Himalaya. *Earth and Planetary Science Letters* 234, 83–97.

van Hinsbergen, D.J.J., Steinberger, B., Doubrovine, P., Gassmüller, R., 2011. Acceleration and deceleration of India-Asia convergence since the Cretaceous: Roles of mantle plumes and continental collision. *Journal of Geophysical Research* 116, B06101, doi: 10.1029/2010JB008051.#

### 3. References Cited in **Tables S3, S4, and S5**

- Booth, A.L., Zeitler, P.K., Kidd, W.S.F., Wooden, J., Liu, Y.P., Idleman, B., Hren, M., Chamberlain, C.P., 2004. U-Pb zircon constraints on the tectonic evolution of Southeastern Tibet, Namche Barwa area. *American Journal of Science* 304, 889–929.
- Chen, L., Qin, K.Z., Li, G.M., Li, J.X., Xiao, B., Zhao, J.X., Fan, X., 2014. Zircon U–Pb ages, geochemistry and Sr-Nd-Pb-Hf isotopes of Nuri intrusive rocks in Gangdese area, southern Tibet: Constraints on timing, petrogenesis and tectonic transformation. *Lithos* 212–215, 379–396.
- Chen, W., Ma, C.Q., Bian, Q.J., Zhou, R.J., Long, T.C., Yu, S.L., Chen, D.M., Tu, J.H., 2010. Subduction-related late Cretaceous granitoids in Demingding area, east of middle Gangdese, Tibet: Evidences from zircon U-Pb geochronology and geochemistry. *Journal of Mineral and Petrology* 30, 83–92.
- Chu, M.F., Chung, S.L., O’Reilly, S.Y., Pearson, N.J., Wu, F.Y., Li, X.H., Liu, D.Y., Ji, J.Q., Chu, C.H., Lee, H.Y., 2011. India’s hidden inputs to Tibetan orogeny revealed by Hf isotopes of Transhimalayan zircons and host rocks. *Earth and Planetary Science Letters* 307, 479–486.
- Chu, M.F., Chung, S.L., Song, B., Liu, D.Y., O’Reilly, S.Y., Pearson, N.J., Ji, J.Q., Wen, D.J., 2006. Zircon U-Pb and Hf isotope constraints on the Mesozoic tectonics and crustal evolution of southern Tibet. *Geology* 34, 745–748.
- Cong, Y., Xiao, K.Y., Zhai, Q.G., Dong, Q.J., 2012. LA-ICP-MS dating and Hf isotopic analysis of zircon from the Puluogang granite in Namulin County, Tibet, and its geological significance. *Journal of Jilin University* 42, 1783–1795.
- Guan, Q., Zhu, D.C., Zhao, Z.D., Dong, G.C., Mo, X.X., Liu, Y.S., Hu, Z.C., Yuan, H.L., 2011. Zircon U-Pb chronology, geochemistry of the Late Cretaceous mafic magmatism in the southern Lhasa terrane and its implications. *Acta Petrologica Sinica* 27, 2083–2094 (in Chinese with English abstract).
- Guan, Q., Zhu, D.C., Zhao, Z.D., Dong, G.C., Zhang, L.L., Li, X.W., Liu, M., Liu, M.H., Mo, X.X., Liu, Y.S., Yuan, H.L., 2012. Crustal thickening prior to 38 Ma in southern Tibet: evidence from lower crust-derived adakitic magmatism in the Gangdese Batholith. *Gondwana Research* 21, 88–99.
- Guan, Q., Zhu, D.C., Zhao, Z.D., Zhang, L.L., Liu, M., Li, X.W., Yu, F., Mo, X.X., 2010. Late Cretaceous adakites in the eastern segment of the Gangdese Belt, southern Tibet: Products

- of Neo-Tethyan ridge subduction? *Acta Petrologica Sinica* 26, 2165–2179 (in Chinese with English abstract).
- Guo, L., 2012. The tectono-magma events in the western margin of the eastern Himalayan syntaxis and their geodynamic implications. Ph.D thesis, China University of Geosciences (Wuhan), p. 1–139.
- Guo, L., Zhang, H.F., Harris, N., Pan, F.B., Xu, W.C., 2011. Origin and evolution of multi-stage felsic melts in eastern Gangdese belt: Constraints from U-Pb zircon dating and Hf isotopic composition. *Lithos* 127, 54–67.
- Huang, Y., Zhao, Z.D., Zhang, F.Q., Zhu, D.C., Dong, G.C., Mo, X.X., 2010. Geochemistry and implication of the Gangdese batholiths from Renbu and Lhasa areas in southern Gangdese, Tibet. *Acta Petrologica Sinica* 26, 3131–3142 (in Chinese with English abstract).
- Ji, W. Q., Wu, F. Y., Liu, C. Z., Chung, S. L., 2012. Early Eocene crustal thickening in southern Tibet: New age and geochemical constraints from the Gangdese batholith. *Journal of Asian Earth Sciences* 53, 82–95.
- Ji, W.Q., 2010. Geochronology and petrogenesis of granitic rocks from east segment of the Gangdese Batholith, southern Tibet. Ph.D thesis, Chinese Academy of Sciences, p. 1–146.
- Ji, W.Q., Wu, F.Y., Chung, S.L., Li, J.X., Liu, C.Z., 2009. Zircon U-Pb chronology and Hf isotopic constraints on the petrogenesis of Gangdese batholiths, southern Tibet. *Chemical Geology* 262, 229–245.
- Jia, L.L., Wang, Q., Zhu, D.C., Chen, Y., Wu, X.Y., Liu, S.A., Zheng, J.P., Zhao, T.P., 2013. Rethinking the geodynamical implications of the basic rocks from Linzhou basin, Tibet. *Acta Petrologica Sinica* 29, 3671–3680 (in Chinese with English abstract).
- Jiang, Z.Q., Wang, Q., Li, Z.X., Wyman, D.A., Tang, G.J., Jia, X.H., Yang, Y.H., 2012. Late Cretaceous (ca. 90 Ma) adakitic intrusive rocks in the Kelu area, Gangdese belt (southern Tibet): Slab melting and implications for Cu–Au mineralization. *Journal of Asian Earth Sciences* 53, 67–81.
- Lee, H.Y., Chung, S.L., Ji, J.Q., Qian, Q., Gallet, S., Lo, C.H., Lee, T.Y., Zhang, Q., 2012. Geochemical and Sr-Nd isotopic constraints on the genesis of the Cenozoic Linzizong volcanic successions, southern Tibet. *Journal of Asian Earth Sciences* 53, 96–114.
- Liu, Y.F., Yang, Z.M., Xie, Y.L., Zhou, P., Du, D.H., Li, Y.X., Li, Q.Y., Qu, H.C., Xu, B., 2012. Zircon SHRIMP U-Pb age and geochemistry of intrusive rocks from Nongruri gold deposit, Gangdese, Tibet. *Mineral Deposits* 31, 727–744 (in Chinese with English abstract).

- Luo, M.C., Wang, L.Q., Leng, Q.F., Chen, W., 2011. Zircon Hf isotope and  $Ce^{4+}/Ce^{3+}$  ratio of the monzogranite porphyry and biotite monzonitic granite in Bangpu Mo(Cu) deposit, Tibet. *Mineral Deposits* 30, 266–278 (in Chinese with English abstract).
- Ma, L., Wang, B.D., Jiang, Z.Q., Wang, Q., Li, Z.X., Wyman, D.A., Zhao, S.R., Yang, J.H., Gou, G.N., Guo, H.F., 2014. Petrogenesis of the Early Eocene adakitic rocks in the Napuri area, southern Lhasa: Partial melting of thickened lower crust during slab break-off and implications for crustal thickening in southern Tibet. *Lithos* 196–197, 321–338.
- Ma, L., Wang, Q., Li, Z.X., Wyman, D.A., Jiang, Z.Q., Yang, J.H., Gou, G.N., Guo, H.F., 2013. Early Late Cretaceous (ca. 93 Ma) norites and hornblendites in the Milin area, eastern Gangdese: Lithosphere–asthenosphere interaction during slab roll-back and an insight into early Late Cretaceous (ca. 100–80 Ma) magmatic “flare-up” in southern Lhasa (Tibet). *Lithos* 172–173, 17–30.
- Ma, L., Wang, Q., Wyman, D.A., Jiang, Z.Q., Yang, J.H., Li, Q.L., Gou, G.N., Guo, H.F., 2013. Late Cretaceous crustal growth in the Gangdese area, southern Tibet: Petrological and Sr–Nd–Hf–O isotopic evidence from Zhengga diorite–gabbro. *Chemical Geology* 349–350, 54–70.
- Ma, L., Wang, Q., Wyman, D.A., Li, Z.X., Jiang, Z.Q., Yang, J.H., Gou, G.N., Guo, H.F., 2013. Late Cretaceous (100–89 Ma) magnesian charnockites with adakitic affinities in the Milin area, eastern Gangdese: Partial melting of subducted oceanic crust and implications for crustal growth in southern Tibet. *Lithos* 175–176, 315–332.
- Mo, X.X., Niu, Y.L., Dong, G.C., Zhao, Z.D., Hou, Z.Q., Zhou, S., Ke, S., 2008. Contribution of syncollisional felsic magmatism to continental crust growth: A case study of the Paleocene Linzizong Volcanic Succession in southern Tibet. *Chemical Geology* 250, 49–67.
- Quidelleur, X., Grove, M., Lovera, O.M., Harrison, T.M., Yin, A., Ryerson, F.J., 1997. Thermal evolution and slip history of the Renbu Zedong Thrust, southeastern Tibet. *Journal of Geophysical Research* 102(B2): 2659–2679.
- Wang, B.D., Wang, L.Q., Li, B., Huang, H.X., Chen, F.Q., Duan, Z.M., Zeng, Q.G., 2012. Geochronology and petrogenesis of the ore-bearing pluton in Chagele deposit in middle of the Gangdese metallogenic belt. *Acta Petrologica Sinica* 28, 1647–1662.
- Wang, L., Zeng, L.S., Gao, L.E., Chen, Z.Y. 2013. Early Cretaceous high Mg# and high Sr/Y clinopyroxene-bearing diorite in the southeast Gangdese batholith, southern Tibet. *Acta Petrologica Sinica* 29, 1977–1994.

- Watson, E.B., Harrison, T.M., 1983. Zircon saturation revisited: temperature and composition effects in a variety of crustal magma types. *Earth and Planetary Science Letters* 64, 295–304.
- Wen, D.R., Chung, S.L., Song, B., Iizuka, Y., Yang, H.J., Ji, J., Liu, D., Gallet, S., 2008b. Late Cretaceous Gangdese intrusions of adakitic geochemical characteristics, SE Tibet: Petrogenesis and tectonic implications. *Lithos* 105, 1–11.
- Wen, D.R., Liu, D.Y., Chung, S.L., Chu, M.F., Ji, J.Q., Zhang, Q., Song, B., Lee, T.Y., Yeh, M.W., Lo, C.H., 2008. Zircon SHRIMP U–Pb ages of the Gangdese batholith and implications for Neotethyan subduction in southern Tibet. *Chemical Geology* 252, 191–201.
- Wen, D.W., 2007. The Gangdese Batholith, southern Tibet: Ages, geochemical characteristics and petrogenesis. Ph.D thesis, National Taiwan University, p. 1–120.
- Xu, W.C., 2010. Spatial variation of zircon U–Pb ages and Hf isotopic compositions of the Gangdese granitoids and its geologic implications. Ph.D thesis, China University of Geosciences (Wuhan), p. 1–172.
- Yue, Y.H., Ding, L., 2006.  $^{40}\text{Ar}/^{39}\text{Ar}$  Geochronology, geochemical characteristics and genesis of the Linzhou basic dikes, Tibet. *Acta Petrologica Sinica*, 22(4): 855–866 (in Chinese with English abstract).
- Zhang, Z.M., Dong, X., Xiang, H., He, Z.Y., Liou, J.G., 2014. Metagabbros of the Gangdese arc root, south Tibet: Implications for the growth of continental crust. *Geochimica et Cosmochimica Acta*, doi: 10.1016/j.gca.2014.01.045.
- Zhang, Z.M., Dong, X., Xiang, H., Liou, J.G., Santosh, M., 2013. Building of the Deep Gangdese Arc, South Tibet: Paleocene Plutonism and Granulite-Facies Metamorphism. *Journal of Petrology* 54, 2547–2580.
- Zhang, Z.M., Zhao, G.C., Santosh, M., Wang, J.L., Dong, X., Shen, K., 2010. Late Cretaceous charnockite with adakitic affinities from the Gangdese batholith, southeastern Tibet: Evidence for Neo-Tethyan mid-ocean ridge subduction? *Gondwana Research* 17, 615–631.
- Zhu, D.C., Zhao, Z.D., Niu, Y.L., Dilek, Y., Hou, Z.Q., Mo, X.X., 2013. The origin and pre-Cenozoic evolution of the Tibetan Plateau. *Gondwana Research* 23, 1429–1454.
- Zhu, D.C., Zhao, Z.D., Niu, Y.L., Mo, X.X., Chung, S.L., Hou, Z.Q., Wang, L.Q., Wu, F.Y., 2011. The Lhasa Terrane: Record of a microcontinent and its histories of drift and growth. *Earth and Planetary Science Letters* 301, 241–255.
